# Supplementary material for: Pan-cancer analysis of NUP155 and validation of its role in breast cancer cell proliferation, migration, and apoptosis
Source: Springer Nature journal article supplement (doi:10.1186/s12885-024-12039-6), 2024-03-19

# Figure 11C

NUP155  
155Kd

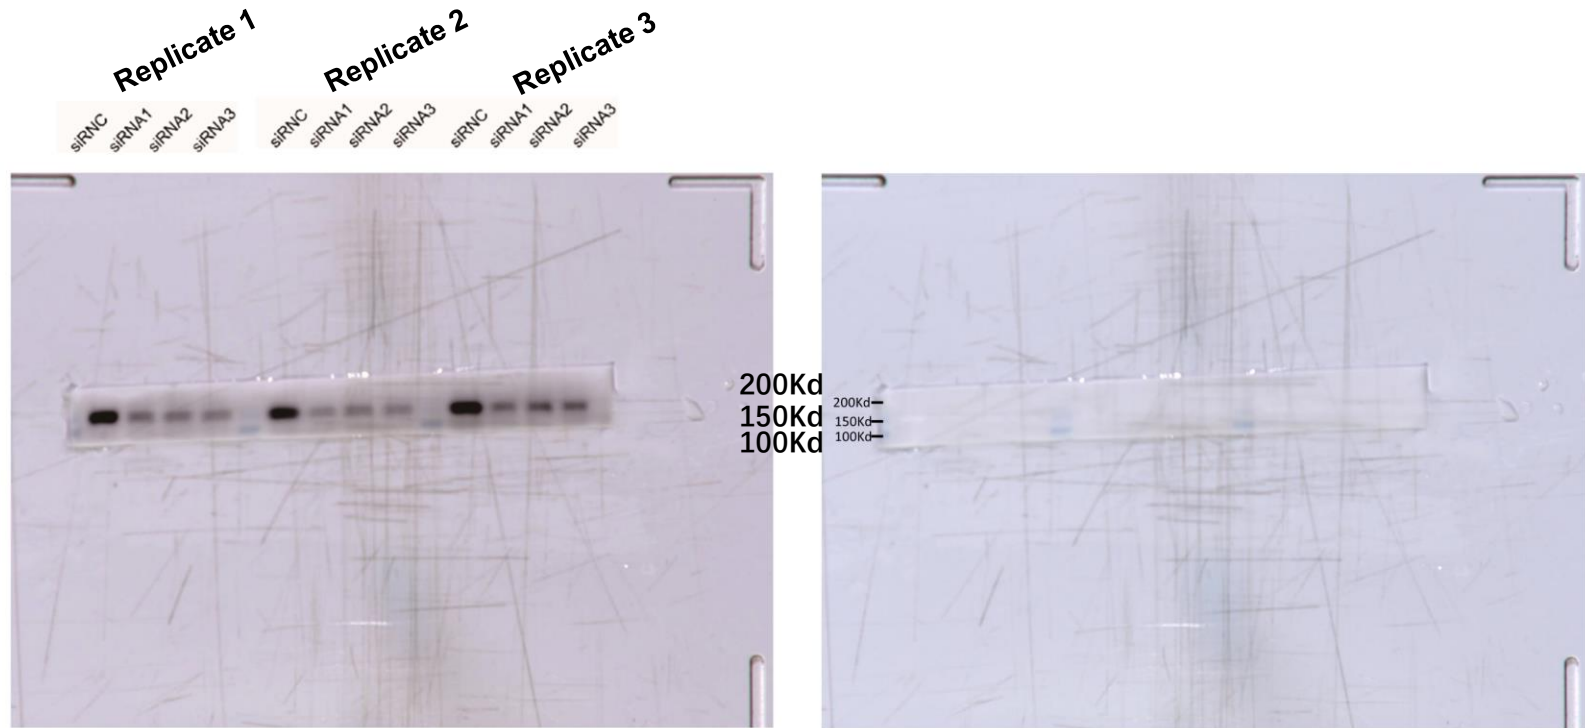

$\beta$ -actin  
42Kd

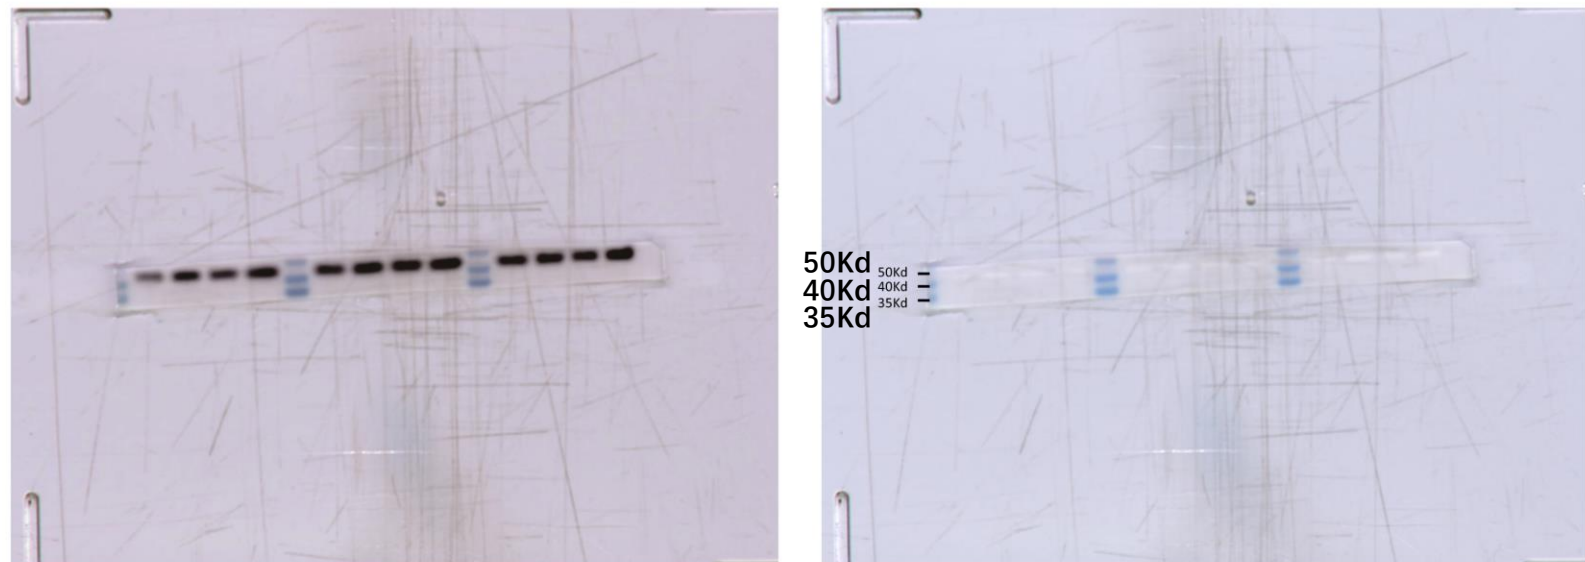

Figure 11E

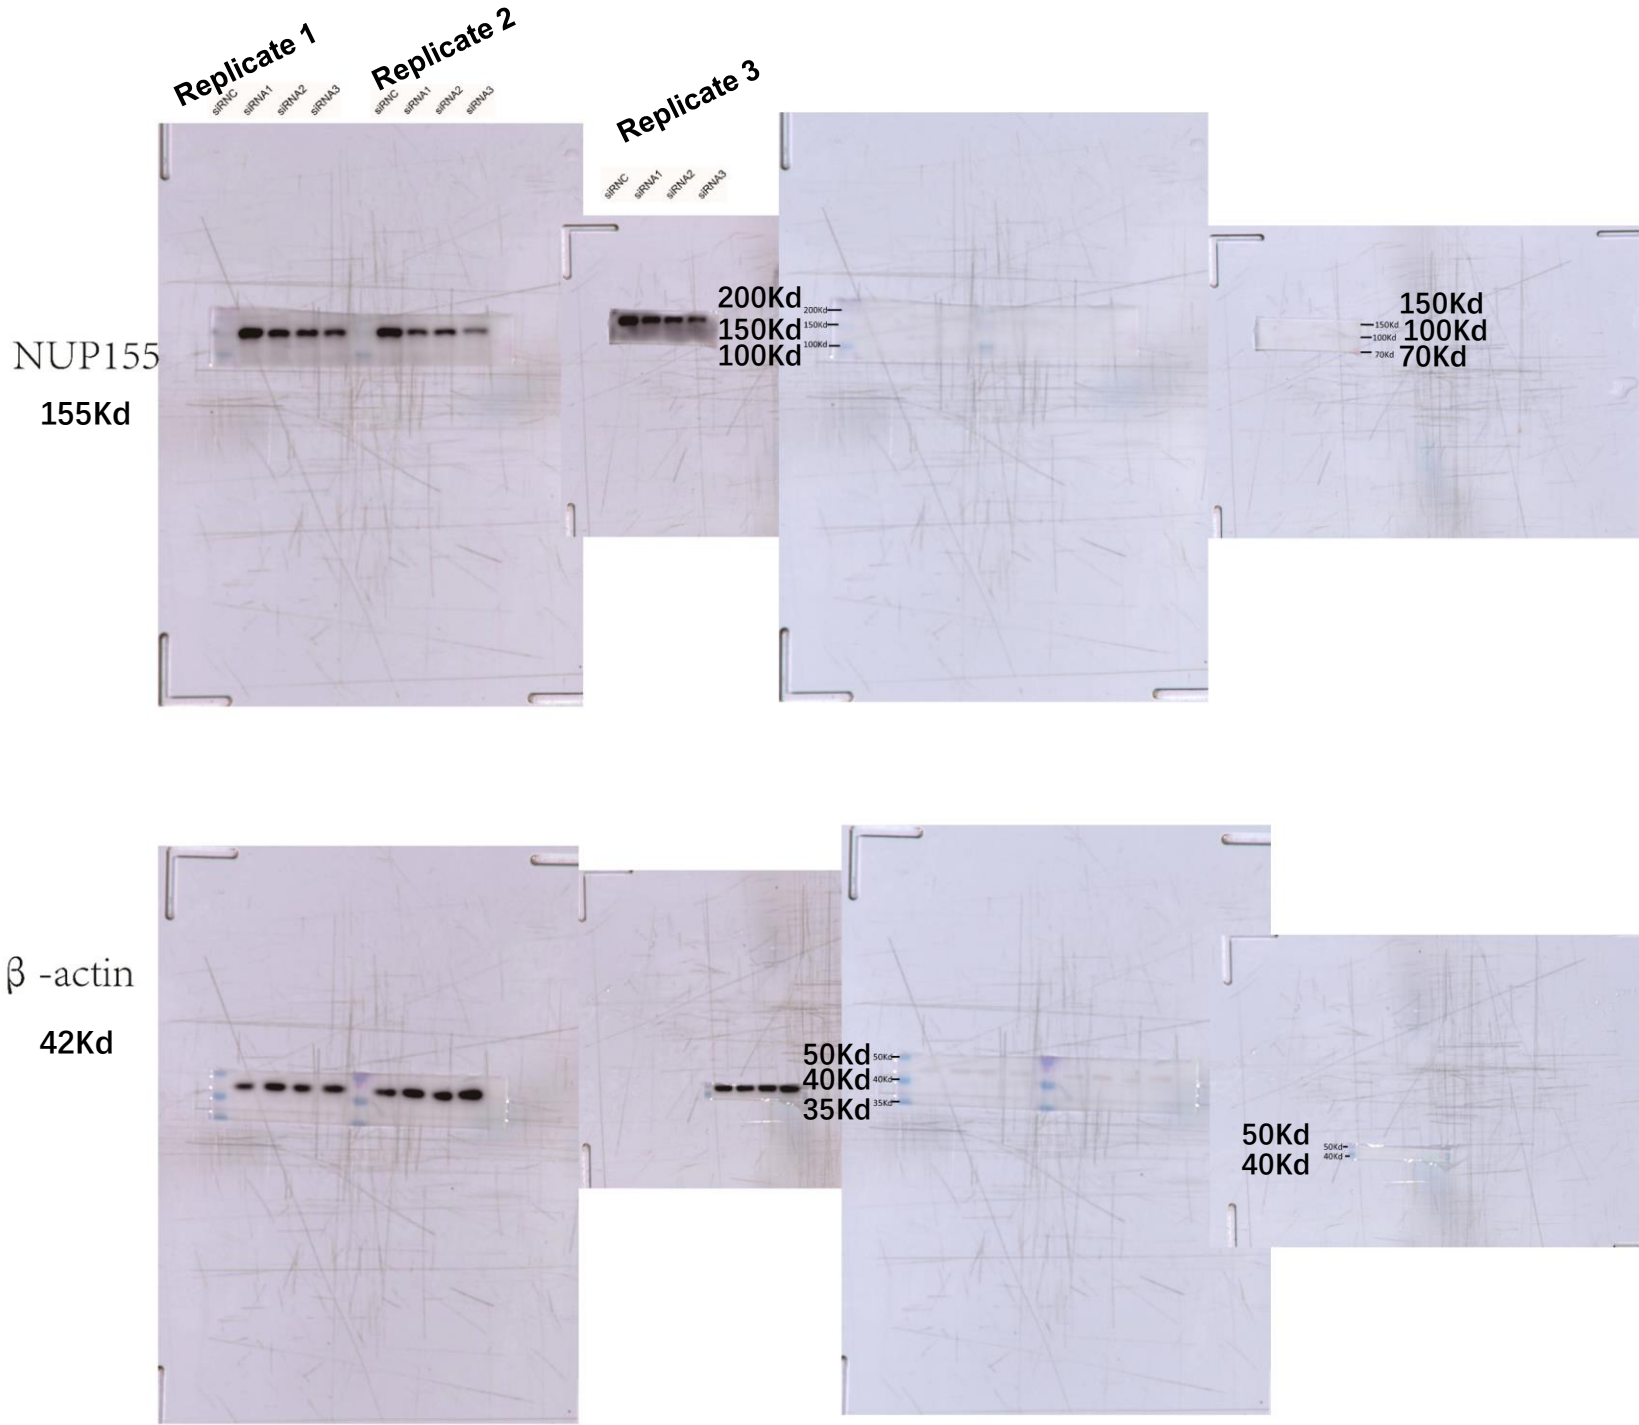

# Figure 11J

Replicate 1  
Replicate 2  
Replicate 3

siRNC siRNA1 siRNA2 siRNA3 siRNC siRNA1 siRNA2 siRNA3 siRNC siRNA1 siRNA2 siRNA3

$\beta$ -actin  
42Kd

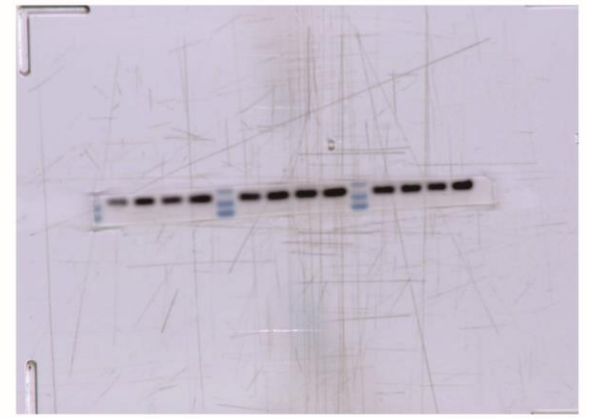

50Kd  
40Kd  
35Kd

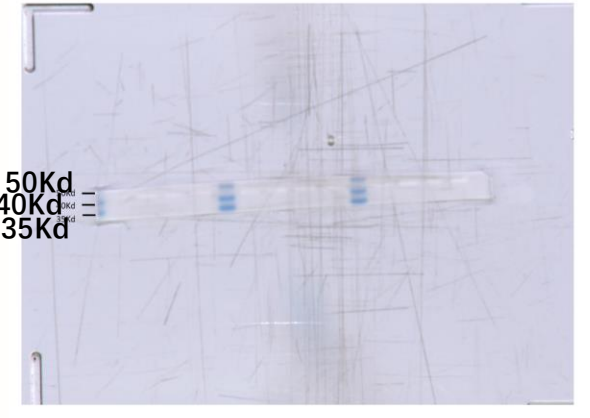

Bcl2  
26Kd

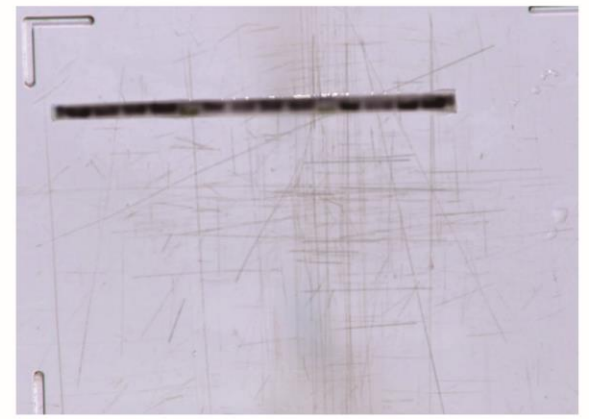

25Kd

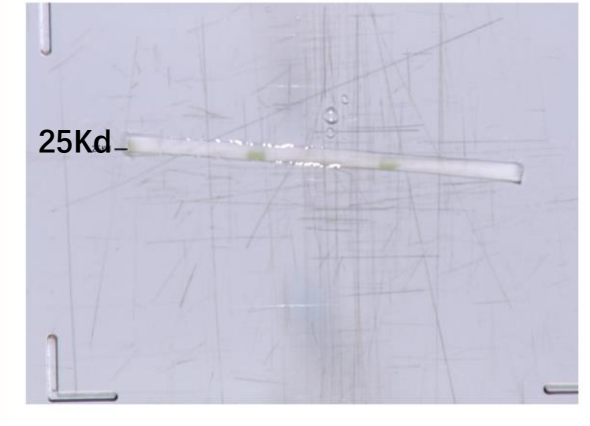

Bax  
21Kd

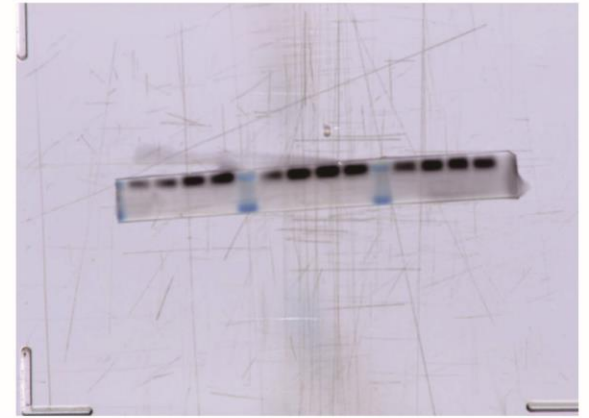

20Kd  
15Kd

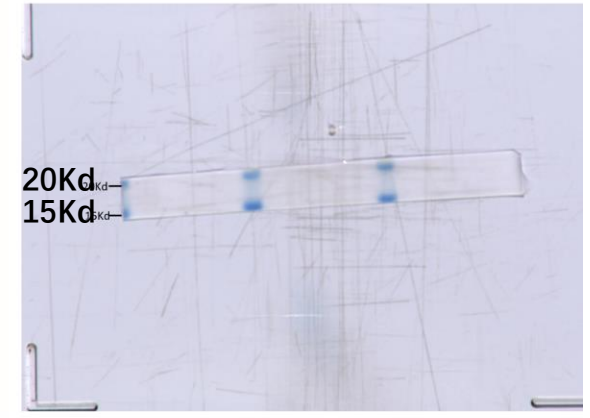

# Figure 11L

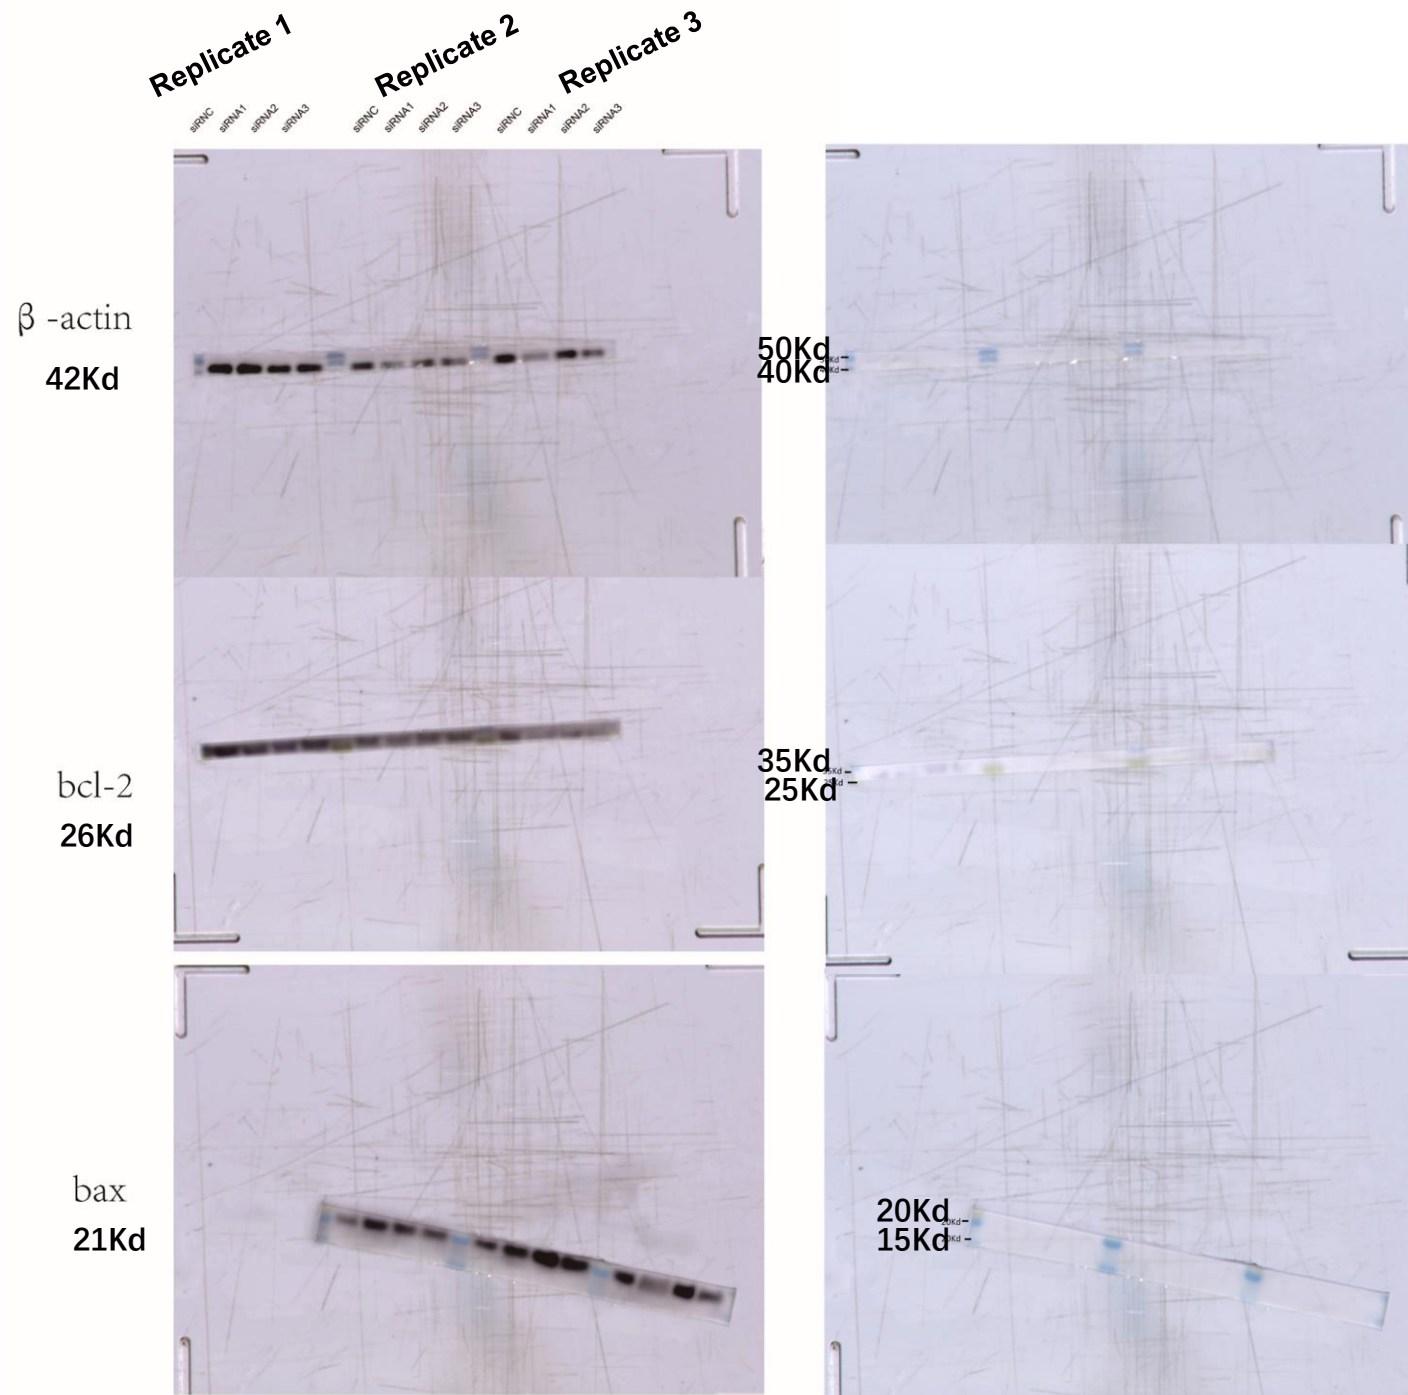

Supplement: MOESM1 [file 12885_2024_12039_MOESM1_ESM-1.pdf]
