# Supplementary material for: Pan-cancer analysis of NUP155 and validation of its role in breast cancer cell proliferation, migration, and apoptosis
Source: BMC Cancer. 2024 Mar 19;24:353. doi: 10.1186/s12885-024-12039-6 (PMC10953186; doi:10.1186/s12885-024-12039-6)
Supplement: Supplementary file 3 — Additional file 3: Supplementary figure 2. (A) Association between NUP155 CNV and mRNA in pan-cancer. (B) The top six with the highest correlation scores between NUP155 CNV and mRNA. [file 12885_2024_12039_MOESM3_ESM.xlsx]

## Sheet: Sheet1
Supplementary Table S1. The R-Scripts and online tools in this study.
Content	R package or Online tool (Website)	Citations
DNA methylation and protein levels between normal and tumors	UALCAN (https://ualcan.path.uab.edu/)	PMID: 35078134, 28732212
NUP155 expression profiles in the microenvironment from the single cell level	TISCH (http://tisch.comp-genomics.org/)	PMID: 33179754
NUP155 expression at different pathological stages of pan-cancer	GEPIA2 (http://gepia2.cancer-pku.cn/#index)	PMID: 31114875
Kaplan-Meier survival analysis with the best cut-off; Cox regression	"survival"	Borgan, Ø. (2001), Modeling Survival Data: Extending the Cox Model. Terry M. Therneau and Patricia M. Grambsch, Springer-Verlag, New York, 2000. No. of pages: xiii + 350. Price: $69.95. ISBN 0-387-98784-3. Statist. Med., 20: 2053-2054. https://doi.org/10.1002/sim.956
Kaplan-Meier survival analysis with the best cut-off; Cox regression	"survminer"	Kassambara A, Kosinski M, Biecek P, et al. Survminer: Drawing Survival Curves Using “Ggplot2”. 2020[J]. URL https://CRAN. R-project. org/package= survminer. R package version 0.4, 2020, 8: 556.
Tumor mutation burden (TMB) analysis	"maftools"	Mayakonda A, Lin DC, Assenov Y, Plass C, Koeffler HP. 2018. Maftools: efficient and comprehensive analysis of somatic variants in cancer. Genome Research. http://dx.doi.org/10.1101/gr.239244.118
Microsatellite instability (MSI) analysis	MANTIS software (https://www.mantisbi.io/)	PMID: 29850653
NUP155 expression and somatic mutations among pan-cancer	cBioPortal (http://www.cbioportal.org/)	PMID: 22588877
Immune cell infiltration analysis——ESTIMATE	"ESTIMATE"	PMID: 24113773
Immune cell infiltration analysis——CIBERSORT	"CIBERSORT"	PMID: 25822800
Immune cell infiltration analysis——xCell	xCell (http://xCell.ucsf.edu/ .)	PMID: 29141660
Comparative analysis between groups.	"limma"	PMID: 25605792
Correlation analysis	"corrplot"	Taiyun Wei and Viliam Simko (2017). R package "corrplot": Visualization of a Correlation Matrix (Version 0.84). Available from https://github.com/taiyun/corrplot
Protein-protein interaction (PPI) network	GeneMANIA (http://genemania.org/)	PMID: 29912392
Gene Ontology (GO) and Kyoto Encyclopedia of Genes and Genomes (KEGG)	"clusterProfiler"	PMID: 34557778
