# Supplementary material for: Pan-cancer analysis of NUP155 and validation of its role in breast cancer cell proliferation, migration, and apoptosis
Source: BMC Cancer. 2024 Mar 19;24:353. doi: 10.1186/s12885-024-12039-6 (PMC10953186; doi:10.1186/s12885-024-12039-6)
Supplement: Supplementary file 4 — Additional file 4: Supplementary figure 3. Association between NUP155 expression levels and Disease-free survival (DSS) in TCGA pan-cancer. (A) Forest plot of association of NUP155 expression and DSS. (B–J) Kaplan-Meier analysis of the association between NUP155 expression and DSS. [file 12885_2024_12039_MOESM4_ESM.xlsx]

## Sheet: Ark1
Supplementary Table S2. The detail results of the methylation levels of NUP155 in pan-cancer
Promoter methylation level of NUP155 in BRCA						Statistical significance
TCGA samples	Series 1					0.0043551
	low	q1	median	q3	high
Normal	0.021	0.027	0.031	0.034	0.043
(n=97)
Primary tumor	0.02	0.03	0.034	0.041	0.068
(n=793)
Promoter methylation level of NUP155 in COAD
TCGA samples	Series 1					1.9716e-05
	low	q1	median	q3	high
Normal	0.034	0.04	0.047	0.052	0.06
(n=37)
Primary tumor	0.027	0.035	0.046	0.093	0.16
(n=313)
Promoter methylation level of NUP155 in CESC
TCGA samples	Series 1					1.2543e-07
	low	q1	median	q3	high
Normal	0.032	0.034	0.036	0.037	0.038
(n=3)
Primary tumor	0.024	0.039	0.057	0.095	0.17
(n=307)
Promoter methylation level of NUP155 in ESCA
TCGA samples	Series 1					0.00072496
	low	q1	median	q3	high
Normal	0.027	0.028	0.031	0.034	0.036
(n=16)
Primary tumor	0.022	0.03	0.036	0.059	0.122
(n=185)
Promoter methylation level of NUP155 in HNSC
TCGA samples	Series 1					1.62514e-12
	low	q1	median	q3	high
Normal	0.03	0.033	0.039	0.043	0.056
(n=50)
Primary tumor	0.022	0.035	0.043	0.057	0.099
(n=528)
Promoter methylation level of NUP155 in LUAD
TCGA samples	Series 1					2.1543e-05
	low	q1	median	q3	high
Normal	0.05	0.056	0.06	0.068	0.079
(n=32)
Primary tumor	0.041	0.056	0.062	0.072	0.11
(n=473)
Promoter methylation level of NUP155 in LIHC
TCGA samples	Series 1					6.2026e-09
	low	q1	median	q3	high
Normal	0.037	0.042	0.044	0.046	0.049
(n=50)
Primary tumor	0.024	0.038	0.052	0.067	0.115
(n=377)
Promoter methylation level of NUP155 in KIRC
TCGA samples	Series 1					2.22045e-16
	low	q1	median	q3	high
Normal	0.022	0.028	0.031	0.033	0.039
(n=160)
Primary tumor	0.023	0.031	0.034	0.038	0.051
(n=324)
Promoter methylation level of NUP155 in LUSC
TCGA samples	Series 1					3.96094e-12
	low	q1	median	q3	high
Normal	0.027	0.031	0.034	0.036	0.04
(n=42)
Primary tumor	0.022	0.032	0.035	0.039	0.058
(n=370)
Promoter methylation level of NUP155 in PAAD
TCGA samples	Series 1
	low	q1	median	q3	high	0.00029581
Normal	0.024	0.026	0.029	0.033	0.037
(n=10)
Primary tumor	0.025	0.03	0.033	0.037	0.053
(n=184)
Promoter methylation level of NUP155 in PRAD
TCGA samples	Series 1
	low	q1	median	q3	high	6.5371e-09
Normal	0.029	0.034	0.035	0.037	0.043
(n=50)
Primary tumor	0.02	0.028	0.031	0.034	0.044
(n=502)
Promoter methylation level of NUP155 in READ
TCGA samples	Series 1
	low	q1	median	q3	high	0.0094153
Normal	0.042	0.043	0.046	0.047	0.049
(n=7)
Primary tumor	0.023	0.034	0.04	0.078	0.149
(n=98)
Promoter methylation level of NUP155 in SARC
TCGA samples	Series 1					0.00133728
	low	q1	median	q3	high
Normal	0.025	0.025	0.026	0.028	0.03
(n=4)
Primary tumor	0.021	0.028	0.031	0.034	0.049
(n=261)
Promoter methylation level of NUP155 in UCEC
TCGA samples	Series 1					1.62448e-12
	low	q1	median	q3	high
Normal	0.026	0.034	0.041	0.047	0.062
(n=46)
Primary tumor	0.023	0.038	0.065	0.105	0.167
(n=438)
Promoter methylation level of NUP155 in TGCT
TCGA samples	Series 1					0.028799
	low	q1	median	q3	high
Seminoma	0.025	0.029	0.031	0.033	0.039
(n=63)
Non-seminoma	0.024	0.028	0.03	0.033	0.039
(n=69)
