# Supplementary material for: Pan-cancer analysis of NUP155 and validation of its role in breast cancer cell proliferation, migration, and apoptosis
Source: BMC Cancer. 2024 Mar 19;24:353. doi: 10.1186/s12885-024-12039-6 (PMC10953186; doi:10.1186/s12885-024-12039-6)
Supplement: Supplementary file 5 — Additional file 5: Supplementary figure 4. Association between NUP155 expression levels and Progression-free survival (PFS) in TCGA pan-cancer. (A) Forest plot of association of NUP155 expression and PFS. (B–K) Kaplan-Meier analysis of the association between NUP155 expression and PFS. [file 12885_2024_12039_MOESM5_ESM.xlsx]

## Sheet: SheetName
Supplementary Table S3. The landscape of NUP155 copy number variation (CNV) in different cancer types.
cancertype	symbol	spm	fdr	entrez
ACC	NUP155	0.251099	0.111553	9631
BLCA	NUP155	0.470608	4.59494e-22	9631
BRCA	NUP155	0.332346	2.95049e-28	9631
CESC	NUP155	0.449906	2.30711e-14	9631
CHOL	NUP155	0.42927	0.161205	9631
COAD	NUP155	0.299485	2.5294e-06	9631
DLBC	NUP155	0.311377	1	9631
ESCA	NUP155	0.563689	8.06389e-15	9631
GBM	NUP155	0.114826	0.42607	9631
HNSC	NUP155	0.453886	9.16133e-26	9631
KICH	NUP155	0.534936	0.000722913	9631
KIRC	NUP155	0.272597	7.4758e-09	9631
KIRP	NUP155	0.213314	0.00212851	9631
LAML	NUP155	0.0740049	0.999933	9631
LGG	NUP155	0.126448	0.0176707	9631
LIHC	NUP155	0.264993	2.28644e-06	9631
LUAD	NUP155	0.565285	3.96137e-42	9631
LUSC	NUP155	0.714928	2.80039e-75	9631
MESO	NUP155	0.256743	0.107446	9631
OV	NUP155	0.508572	3.21644e-20	9631
PAAD	NUP155	0.174688	0.0771681	9631
PCPG	NUP155	0.260135	0.015021	9631
PRAD	NUP155	0.103003	0.1119	9631
READ	NUP155	0.280868	0.0324486	9631
SARC	NUP155	0.552578	1.61913e-19	9631
SKCM	NUP155	0.350437	5.58143e-11	9631
STAD	NUP155	0.397412	1.57931e-15	9631
TGCT	NUP155	0.139943	0.225315	9631
THCA	NUP155	0.08491	0.579159	9631
THYM	NUP155	0.148962	0.572753	9631
UCEC	NUP155	0.330376	9.0905e-05	9631
UCS	NUP155	0.664343	5.33114e-06	9631
UVM	NUP155	0.137018	0.801921	9631
