# Supplementary material for: Pan-cancer analysis of NUP155 and validation of its role in breast cancer cell proliferation, migration, and apoptosis
Source: BMC Cancer. 2024 Mar 19;24:353. doi: 10.1186/s12885-024-12039-6 (PMC10953186; doi:10.1186/s12885-024-12039-6)
Supplement: Supplementary file 6 — Additional file 6: Supplementary figure 5. Eight tumors with the highest correlation coefficients between NUP155 expression and the tumor microenvironment. (A) Correlation between NUP155 and stromal scores in GBM, STES, TGCT, SKCM, SARC, KIPAN, STAD, KIRC. (B) Correlation between NUP155 and immune scores in GBM, STES, UCEC, THYM, ESCA, STAD, LUSC, SKCM. [file 12885_2024_12039_MOESM6_ESM.xlsx]

## Sheet: SheetName
Supplementary Table S4. The correlation between NUP155 expression levels and drug sensitivity in the CTRP database
symbol	drug	cor	fdr	entrez
NUP155	16-beta-bromoandrosterone	-0.0317553	0.547499	9631
NUP155	1S,3R-RSL-3	-0.00146809	0.977327	9631
NUP155	3-Cl-AHPC	-0.0471526	0.246112	9631
NUP155	968	-0.0301925	0.994522	9631
NUP155	A-804598	-0.0743283	0.601738	9631
NUP155	AA-COCF3	0.0068821	0.887676	9631
NUP155	ABT-199	-0.0321129	0.604302	9631
NUP155	ABT-737	0.0447748	0.346396	9631
NUP155	AC55649	-0.0690698	0.54156	9631
NUP155	AGK-2	-0.0400167	0.910276	9631
NUP155	AM-580	0.023226	0.703115	9631
NUP155	AT-406	-0.103979	0.260507	9631
NUP155	AT13387	-0.026221	0.686527	9631
NUP155	AT7867	0.0173496	0.713083	9631
NUP155	AZ-3146	0.0241833	0.605106	9631
NUP155	AZD1480	5.4139e-05	0.999376	9631
NUP155	AZD4547	0.049745	0.3072	9631
NUP155	AZD6482	0.00508095	0.948667	9631
NUP155	AZD7545	-0.129599	0.00172166	9631
NUP155	AZD7762	-0.0666914	0.0917999	9631
NUP155	AZD8055	0.0103633	0.822633	9631
NUP155	B02	0.0140621	0.761352	9631
NUP155	BCL-LZH-4	-0.0120279	0.967052	9631
NUP155	BEC	0.0644234	0.999979	9631
NUP155	BI-2536	-0.0957405	0.0108419	9631
NUP155	BIBR-1532	-0.0463944	0.341505	9631
NUP155	BIRB-796	0.0141904	0.790526	9631
NUP155	BIX-01294	0.0304139	0.467541	9631
NUP155	BMS-195614	-0.0459253	0.472273	9631
NUP155	BMS-270394	0.0153327	0.77991	9631
NUP155	BMS-345541	-0.0192191	0.653321	9631
NUP155	BMS-536924	0.0209664	0.741666	9631
NUP155	BMS-754807	0.0107639	0.848437	9631
NUP155	BRD-A02303741	0.00964632	0.88993	9631
NUP155	BRD-A05715709	-0.00317514	0.986946	9631
NUP155	BRD-A71883111	-0.0439587	0.339261	9631
NUP155	BRD-A86708339	-0.00621321	0.930462	9631
NUP155	BRD-A94377914	0.0540193	0.3652	9631
NUP155	BRD-K01737880	-0.277538	0.115175	9631
NUP155	BRD-K02251932	0.0601471	0.238734	9631
NUP155	BRD-K02492147	-0.00269331	0.972796	9631
NUP155	BRD-K04800985	0.0281375	0.99881	9631
NUP155	BRD-K09344309	0.0402432	0.956505	9631
NUP155	BRD-K09587429	0.0254949	0.727038	9631
NUP155	BRD-K11533227	0.011347	0.825067	9631
NUP155	BRD-K13999467	-0.0475018	0.293529	9631
NUP155	BRD-K14844214	0.0722676	0.26775	9631
NUP155	BRD-K16147474	-0.0594413	0.89019	9631
NUP155	BRD-K17060750	-0.00799274	0.900495	9631
NUP155	BRD-K19103580	-0.00659508	0.916349	9631
NUP155	BRD-K24690302	0.033566	0.469856	9631
NUP155	BRD-K26531177	0.0106753	0.822368	9631
NUP155	BRD-K27224038	0.178514	0.347153	9631
NUP155	BRD-K27986637	0.0490563	0.783772	9631
NUP155	BRD-K28456706	-0.0364953	0.416953	9631
NUP155	BRD-K29086754	-0.104097	0.574761	9631
NUP155	BRD-K29313308	-0.0386362	0.396536	9631
NUP155	BRD-K30019337	0.0631653	0.83325	9631
NUP155	BRD-K30748066	-0.269439	0.106316	9631
NUP155	BRD-K33199242	-0.00270894	0.994959	9631
NUP155	BRD-K33514849	-0.121697	0.999288	9631
NUP155	BRD-K34099515	-0.0561827	0.946742	9631
NUP155	BRD-K34222889	-0.00170458	0.969881	9631
NUP155	BRD-K34485477	-0.0066576	0.998562	9631
NUP155	BRD-K35604418	-0.0666078	0.0998739	9631
NUP155	BRD-K37390332	-0.0360038	0.879678	9631
NUP155	BRD-K41334119	0.083864	0.888119	9631
NUP155	BRD-K41597374	-0.0555008	0.183787	9631
NUP155	BRD-K42260513	0.118013	0.967625	9631
NUP155	BRD-K44224150	-0.0188485	0.996933	9631
NUP155	BRD-K45681478	0.00116468	0.982883	9631
NUP155	BRD-K48334597	0.071857	0.552654	9631
NUP155	BRD-K48477130	-0.0137915	0.953531	9631
NUP155	BRD-K49290616	0.0877401	0.80538	9631
NUP155	BRD-K50799972	-0.0785179	0.222449	9631
NUP155	BRD-K51490254	0.0325274	0.472077	9631
NUP155	BRD-K51831558	-0.0261324	0.747508	9631
NUP155	BRD-K52037352	0.0130681	0.874031	9631
NUP155	BRD-K55116708	-0.094532	0.0305142	9631
NUP155	BRD-K61166597	-0.0334014	0.434472	9631
NUP155	BRD-K63431240	0.0448113	0.325036	9631
NUP155	BRD-K64610608	0.0713334	0.504003	9631
NUP155	BRD-K66453893	-0.107046	0.00517691	9631
NUP155	BRD-K66532283	0.0052899	0.908937	9631
NUP155	BRD-K70511574	-0.0945822	0.0143556	9631
NUP155	BRD-K71781559	0.0238298	0.993922	9631
NUP155	BRD-K75293299	-0.0197964	0.955606	9631
NUP155	BRD-K78574327	0.0459645	0.972049	9631
NUP155	BRD-K80183349	0.00867952	0.84967	9631
NUP155	BRD-K84807411	0.0825864	0.75534	9631
NUP155	BRD-K85133207	-0.0180905	0.716544	9631
NUP155	BRD-K86535717	0.0280066	0.952423	9631
NUP155	BRD-K88742110	-0.0386146	0.383852	9631
NUP155	BRD-K90370028	-0.0727206	0.854954	9631
NUP155	BRD-K92856060	-0.049941	0.251131	9631
NUP155	BRD-K96431673	0.116963	0.985799	9631
NUP155	BRD-K96970199	0.0976425	0.998764	9631
NUP155	BRD-K97651142	-0.0550529	0.202195	9631
NUP155	BRD-K99006945	0.0192022	0.816807	9631
NUP155	BRD-M00053801	0.0433568	0.697301	9631
NUP155	BRD1378	0.103539	0.164452	9631
NUP155	BRD1812	-0.0656883	0.110935	9631
NUP155	BRD1835	-0.0472401	0.341992	9631
NUP155	BRD4132	0.0161026	0.833659	9631
NUP155	BRD5468	0.0894362	0.19714	9631
NUP155	BRD6340	-0.0687341	0.08923	9631
NUP155	BRD8899	-0.0185363	0.884519	9631
NUP155	BRD8958	0.111623	0.949897	9631
NUP155	BRD9647	-0.000466584	0.995551	9631
NUP155	BRD9876	0.0332923	0.61978	9631
NUP155	BYL-719	-0.0237724	0.776253	9631
NUP155	Bax channel blocker	-0.0167008	0.746277	9631
NUP155	C6-ceramide	-0.0944849	0.332754	9631
NUP155	CAL-101	-0.00585056	0.947576	9631
NUP155	CAY10576	0.0494904	0.497432	9631
NUP155	CAY10594	0.0829511	0.132145	9631
NUP155	CAY10618	-0.083906	0.0358243	9631
NUP155	CBB-1007	-0.014227	0.957819	9631
NUP155	CCT036477	0.0376184	0.368193	9631
NUP155	CD-1530	-0.0426495	0.457684	9631
NUP155	CD-437	-0.092745	0.0170019	9631
NUP155	CHIR-99021	0.0407478	0.365855	9631
NUP155	CHM-1	-0.0342211	0.395947	9631
NUP155	CI-976	0.00849862	0.96581	9631
NUP155	CID-5951923	0.117519	0.114845	9631
NUP155	CIL41	-0.0837623	0.227064	9631
NUP155	CIL55	0.012002	0.965143	9631
NUP155	CIL55A	-0.0319991	0.636516	9631
NUP155	CIL56	-0.00337199	0.964203	9631
NUP155	CIL70	0.0204648	0.762425	9631
NUP155	COL-3	-0.100292	0.0292761	9631
NUP155	CR-1-31B	-0.0739174	0.0520772	9631
NUP155	Ch-55	-0.0099424	0.873557	9631
NUP155	Compound 1541A	0.0512472	0.41617	9631
NUP155	Compound 23 citrate	-0.00533023	0.906034	9631
NUP155	Compound 7d-cis	-0.0270041	0.572165	9631
NUP155	DBeQ	0.058715	0.185209	9631
NUP155	DNMDP	0.0526449	0.456788	9631
NUP155	ELCPK	-0.0233087	0.739385	9631
NUP155	ETP-46464	-0.0379397	0.518758	9631
NUP155	EX-527	0.0387321	0.762455	9631
NUP155	FGIN-1-27	0.0421208	0.771506	9631
NUP155	FQI-1	-0.0470138	0.431801	9631
NUP155	FQI-2	-0.0728865	0.0602074	9631
NUP155	FSC231	0.0650693	0.99945	9631
NUP155	GANT-61	0.0419218	0.500613	9631
NUP155	GDC-0879	-0.00116447	0.988751	9631
NUP155	GDC-0941	0.020449	0.697803	9631
NUP155	GMX-1778	0.0147108	0.759975	9631
NUP155	GSK-3 inhibitor IX	0.0496	0.263301	9631
NUP155	GSK-J4	-0.26789	0.0745714	9631
NUP155	GSK1059615	-0.0678689	0.802116	9631
NUP155	GSK2636771	-0.0250906	0.832573	9631
NUP155	GSK4112	0.0716111	0.135301	9631
NUP155	GSK461364	-0.100871	0.00878301	9631
NUP155	GSK525762A	0.0154218	0.71592	9631
NUP155	GW-405833	-0.0362791	0.3775	9631
NUP155	GW-843682X	-0.1155	0.00425582	9631
NUP155	HBX-41108	-0.0746029	0.180252	9631
NUP155	HC-067047	-0.0156203	0.839467	9631
NUP155	HLI 373	0.064769	0.129001	9631
NUP155	I-BET151	0.0322732	0.420883	9631
NUP155	IC-87114	0.0497509	0.45802	9631
NUP155	IPR-456	0.0533919	0.693187	9631
NUP155	ISOX	-0.0470652	0.243064	9631
NUP155	IU1	-0.0443795	0.636355	9631
NUP155	JQ-1	-0.0125646	0.769298	9631
NUP155	JW-480	0.00260624	0.993227	9631
NUP155	JW-55	-0.218537	0.074167	9631
NUP155	JW-74	-0.0371877	0.702015	9631
NUP155	KH-CB19	-0.0245961	0.84439	9631
NUP155	KHS101	-0.0203602	0.667905	9631
NUP155	KPT185	-0.122355	0.00680587	9631
NUP155	KU 0060648	0.0112323	0.811605	9631
NUP155	KU-0063794	-0.00536516	0.909969	9631
NUP155	KU-55933	-0.0840474	0.0494179	9631
NUP155	KU-60019	-0.0869739	0.0282667	9631
NUP155	KW-2449	-0.0167045	0.695891	9631
NUP155	KX2-391	-0.0951645	0.0140107	9631
NUP155	Ki8751	0.0512215	0.265286	9631
NUP155	Ko-143	-0.000667175	0.98883	9631
NUP155	L-685458	0.0158669	0.835534	9631
NUP155	LE-135	-0.0176167	0.725564	9631
NUP155	LRRK2-IN-1	-0.045381	0.34798	9631
NUP155	LY-2157299	0.00287813	0.995227	9631
NUP155	LY-2183240	-0.0133133	0.750751	9631
NUP155	MG-132	-0.0271409	0.787648	9631
NUP155	MGCD-265	0.0245453	0.56583	9631
NUP155	MI-1	-0.0731705	0.333642	9631
NUP155	MI-2	-0.111455	0.0901204	9631
NUP155	MK-0752	0.0173188	0.843676	9631
NUP155	MK-1775	-0.123613	0.00147193	9631
NUP155	MK-2206	0.0311043	0.510144	9631
NUP155	ML006	0.00208307	0.975839	9631
NUP155	ML029	-0.0589378	0.194872	9631
NUP155	ML031	0.0311272	0.505865	9631
NUP155	ML050	-0.0381622	0.404012	9631
NUP155	ML083	0.0665253	0.544837	9631
NUP155	ML162	0.00963686	0.847083	9631
NUP155	ML203	0.0286459	0.615407	9631
NUP155	ML210	0.0443619	0.304751	9631
NUP155	ML239	-0.0661028	0.126183	9631
NUP155	ML258	0.0319209	0.779576	9631
NUP155	ML311	-0.0862799	0.0242651	9631
NUP155	ML312	-0.00456657	0.997938	9631
NUP155	ML320	0.00247333	0.966742	9631
NUP155	ML334 diastereomer	0.0822883	0.220313	9631
NUP155	MLN2238	0.026287	0.539468	9631
NUP155	MLN2480	0.0907838	0.324441	9631
NUP155	MST-312	-0.101635	0.00869572	9631
NUP155	Mdivi-1	-0.131058	0.00124637	9631
NUP155	Merck60	-0.0235255	0.571893	9631
NUP155	N9-isopropylolomoucine	-0.0460958	0.279482	9631
NUP155	NPC-26	0.0137089	0.9289	9631
NUP155	NSC 74859	-0.0590829	0.25356	9631
NUP155	NSC19630	-0.0346247	0.513137	9631
NUP155	NSC23766	-0.0361426	0.407134	9631
NUP155	NSC30930	0.00793822	0.937901	9631
NUP155	NSC48300	-0.0661179	0.0977178	9631
NUP155	NSC632839	-0.045659	0.255804	9631
NUP155	NSC95397	-0.0346209	0.429281	9631
NUP155	NVP-231	-0.0856081	0.0292156	9631
NUP155	NVP-ADW742	0.0518074	0.263551	9631
NUP155	NVP-BEZ235	-0.0394119	0.463036	9631
NUP155	NVP-BSK805	0.0228703	0.605932	9631
NUP155	NVP-TAE684	0.0383229	0.453656	9631
NUP155	O-6-benzylguanine	0.0563534	0.669045	9631
NUP155	OSI-027	-0.0620705	0.153953	9631
NUP155	OSI-930	-0.144623	0.000768953	9631
NUP155	PAC-1	-0.0213627	0.624951	9631
NUP155	PD 153035	-0.0123479	0.865618	9631
NUP155	PD318088	0.0555389	0.252696	9631
NUP155	PDMP	0.0219537	0.647371	9631
NUP155	PF-184	-0.0235817	0.58401	9631
NUP155	PF-3758309	-0.118895	0.0350277	9631
NUP155	PF-4800567 hydrochloride	0.0596047	0.999586	9631
NUP155	PF-543	0.0115837	0.835228	9631
NUP155	PF-573228	-0.0164518	0.71649	9631
NUP155	PF-750	-0.0459621	0.354147	9631
NUP155	PHA-793887	-0.0913238	0.0164464	9631
NUP155	PI-103	-0.0243386	0.598219	9631
NUP155	PIK-93	-0.000280852	0.99554	9631
NUP155	PL-DI	-0.0067196	0.878491	9631
NUP155	PLX-4720	-0.0520551	0.469733	9631
NUP155	PRIMA-1	0.0440892	0.287415	9631
NUP155	PRIMA-1-Met	0.108586	0.106696	9631
NUP155	PRL-3 inhibitor I	-0.0152892	0.928765	9631
NUP155	PX-12	-0.00437401	0.918403	9631
NUP155	PYR-41	0.0521019	0.333577	9631
NUP155	QS-11	-0.020288	0.954061	9631
NUP155	QW-BI-011	0.022582	0.839127	9631
NUP155	R428	-0.0102224	0.868278	9631
NUP155	RAF265	0.0321585	0.607533	9631
NUP155	RG-108	0.00205329	0.970982	9631
NUP155	RITA	0.103352	0.0117933	9631
NUP155	RO4929097	0.0203406	0.818998	9631
NUP155	Repligen 136	-0.105831	0.0122706	9631
NUP155	SB-225002	-0.0935622	0.013608	9631
NUP155	SB-431542	0.0331803	0.768516	9631
NUP155	SB-525334	0.0444399	0.408121	9631
NUP155	SB-743921	-0.0733989	0.054471	9631
NUP155	SCH-529074	-0.0186136	0.732669	9631
NUP155	SCH-79797	-0.117545	0.00241659	9631
NUP155	SGX-523	0.0211364	0.770371	9631
NUP155	SID 26681509	-0.0807481	0.0739939	9631
NUP155	SJ-172550	-0.00919682	0.955658	9631
NUP155	SKI-II	0.0324575	0.508716	9631
NUP155	SMER-3	0.0261854	0.60552	9631
NUP155	SN-38	-0.0414688	0.387701	9631
NUP155	SNS-032	-0.0802865	0.0534575	9631
NUP155	SNX-2112	-0.00915229	0.827551	9631
NUP155	SR-II-138A	-0.0836769	0.0259362	9631
NUP155	SR1001	-0.0435072	0.551895	9631
NUP155	SR8278	-0.150111	0.648224	9631
NUP155	SRT-1720	0.0181222	0.725702	9631
NUP155	STF-31	-0.0733799	0.0758045	9631
NUP155	SU11274	0.0552413	0.186805	9631
NUP155	SZ4TA2	-0.0158208	0.918902	9631
NUP155	StemRegenin 1	-0.118962	0.00273691	9631
NUP155	TG-100-115	-0.0265015	0.655453	9631
NUP155	TG-101348	0.00782522	0.87398	9631
NUP155	TGX-221	0.00748295	0.947572	9631
NUP155	TPCA-1	-0.0294164	0.495852	9631
NUP155	TW-37	-0.0336644	0.440336	9631
NUP155	UNC0321	0.0458383	0.679132	9631
NUP155	UNC0638	0.10445	0.0120595	9631
NUP155	VAF-347	0.0384684	0.580518	9631
NUP155	VER-155008	-0.0581951	0.176004	9631
NUP155	VU0155056	0.0605074	0.811428	9631
NUP155	WAY-362450	-0.0186539	0.998521	9631
NUP155	WP1130	-0.040579	0.345737	9631
NUP155	WZ4002	0.0221617	0.797635	9631
NUP155	WZ8040	-0.0141321	0.821876	9631
NUP155	XL765	-0.0467971	0.437736	9631
NUP155	YK 4-279	-0.0995349	0.0093419	9631
NUP155	YM-155	-0.121345	0.0073124	9631
NUP155	ZSTK474	0.0210709	0.736802	9631
NUP155	abiraterone	-0.0531601	0.729138	9631
NUP155	afatinib	-0.0398619	0.431337	9631
NUP155	alisertib	-0.0220293	0.609175	9631
NUP155	alvocidib	-0.146773	0.0103113	9631
NUP155	apicidin	-0.015642	0.709807	9631
NUP155	austocystin D	-0.0171274	0.754838	9631
NUP155	avicin D	0.0127341	0.916317	9631
NUP155	avrainvillamide	-0.0378946	0.475007	9631
NUP155	axitinib	0.00702391	0.877308	9631
NUP155	azacitidine	0.0302252	0.560646	9631
NUP155	bafilomycin A1	-0.132742	0.794345	9631
NUP155	barasertib	-0.0692556	0.0867044	9631
NUP155	bardoxolone methyl	-0.0363126	0.417353	9631
NUP155	belinostat	-0.130221	0.0195698	9631
NUP155	bendamustine	0.0499167	0.260955	9631
NUP155	betulinic acid	0.0253161	0.896695	9631
NUP155	bexarotene	-0.0442395	0.329944	9631
NUP155	birinapant	0.00914615	0.918711	9631
NUP155	blebbistatin	-0.0231016	0.982044	9631
NUP155	bleomycin A2	0.0371512	0.535726	9631
NUP155	bortezomib	0.0480168	0.248863	9631
NUP155	bosutinib	-0.07022	0.0907383	9631
NUP155	brefeldin A	0.0326017	0.50086	9631
NUP155	brivanib	-0.0141102	0.757656	9631
NUP155	cabozantinib	-0.00162361	0.980103	9631
NUP155	canertinib	-0.0067695	0.90822	9631
NUP155	cediranib	0.11071	0.27649	9631
NUP155	ceranib-2	-0.13396	0.000360858	9631
NUP155	cerulenin	-0.059172	0.138145	9631
NUP155	chlorambucil	-0.00209874	0.962552	9631
NUP155	ciclopirox	-0.0184693	0.649413	9631
NUP155	ciclosporin	0.0556846	0.311013	9631
NUP155	cimetidine	0.0322788	0.986313	9631
NUP155	clofarabine	-0.0411906	0.297195	9631
NUP155	crizotinib	0.0215717	0.618574	9631
NUP155	cucurbitacin I	-0.00366853	0.94058	9631
NUP155	curcumin	-0.0418356	0.306056	9631
NUP155	cyanoquinoline 11	-0.0787685	0.357432	9631
NUP155	cyclophosphamide	0.102058	0.993392	9631
NUP155	cytarabine hydrochloride	0.00476979	0.908914	9631
NUP155	cytochalasin B	-0.0058174	0.932761	9631
NUP155	dabrafenib	-0.0246217	0.782295	9631
NUP155	dacarbazine	0.00295938	0.948364	9631
NUP155	daporinad	-0.0903372	0.0425762	9631
NUP155	darinaparsin	-0.000503156	0.99472	9631
NUP155	dasatinib	-0.0279578	0.604928	9631
NUP155	decitabine	-0.0286851	0.478336	9631
NUP155	dexamethasone	0.0197727	0.674683	9631
NUP155	dinaciclib	-0.16683	0.00275207	9631
NUP155	docetaxel	-0.154811	0.00836246	9631
NUP155	doxorubicin	-0.0661786	0.0845075	9631
NUP155	elocalcitol	-1.4234e-05	0.999806	9631
NUP155	entinostat	-0.021675	0.608997	9631
NUP155	epigallocatechin-3-monogallate	-0.0590111	0.20587	9631
NUP155	erastin	-0.00809215	0.875609	9631
NUP155	erismodegib	-0.0486029	0.540743	9631
NUP155	erlotinib	-0.0236776	0.651064	9631
NUP155	etomoxir	-0.0308114	0.962836	9631
NUP155	etoposide	-0.036427	0.367219	9631
NUP155	fingolimod	-0.0014906	0.974984	9631
NUP155	fluorouracil	0.0289081	0.485446	9631
NUP155	fluvastatin	-0.0389443	0.493954	9631
NUP155	foretinib	-0.00305947	0.956862	9631
NUP155	fulvestrant	0.152738	0.590097	9631
NUP155	fumonisin B1	0.097516	0.0565607	9631
NUP155	gefitinib	0.0194476	0.75762	9631
NUP155	gemcitabine	-0.0361367	0.395786	9631
NUP155	gossypol	-0.0576476	0.165433	9631
NUP155	hyperforin	-0.0110106	0.935	9631
NUP155	ibrutinib	-0.0631167	0.285264	9631
NUP155	ifosfamide	-0.00168145	0.996523	9631
NUP155	imatinib	0.0548848	0.210598	9631
NUP155	importazole	0.0500382	0.430583	9631
NUP155	indisulam	-0.0126665	0.779973	9631
NUP155	isoevodiamine	-0.129435	0.000620008	9631
NUP155	isoliquiritigenin	0.17245	0.039628	9631
NUP155	isonicotinohydroxamic acid	0.043248	0.98619	9631
NUP155	istradefylline	-0.104655	0.446772	9631
NUP155	itraconazole	0.0104559	0.913084	9631
NUP155	lapatinib	-0.0195213	0.705533	9631
NUP155	lenvatinib	0.0508762	0.277329	9631
NUP155	leptomycin B	-0.099075	0.00846716	9631
NUP155	linifanib	-0.094368	0.0154395	9631
NUP155	linsitinib	-0.0169545	0.733511	9631
NUP155	lomeguatrib	-0.0564593	0.307155	9631
NUP155	lovastatin	0.0141628	0.822119	9631
NUP155	manumycin A	-0.0983598	0.0104149	9631
NUP155	marinopyrrole A	-0.113549	0.0244265	9631
NUP155	masitinib	0.00252148	0.960129	9631
NUP155	methotrexate	-0.0951946	0.0208362	9631
NUP155	methylstat	-0.044583	0.387885	9631
NUP155	mitomycin	-0.0710579	0.0723384	9631
NUP155	momelotinib	-0.0464624	0.277352	9631
NUP155	myricetin	0.059991	0.564274	9631
NUP155	myriocin	0.0612419	0.899811	9631
NUP155	nakiterpiosin	-0.10361	0.00733095	9631
NUP155	narciclasine	-0.0655796	0.0965333	9631
NUP155	navitoclax	0.0510026	0.25125	9631
NUP155	necrostatin-1	-0.0300321	0.559398	9631
NUP155	necrostatin-7	-0.0154133	0.772318	9631
NUP155	necrosulfonamide	-0.0328192	0.523017	9631
NUP155	nelarabine	0.0177375	0.961848	9631
NUP155	neopeltolide	-0.0610607	0.549609	9631
NUP155	neratinib	-0.00228226	0.968158	9631
NUP155	neuronal differentiation inducer III	0.0156949	0.712569	9631
NUP155	niclosamide	-0.185039	4.07445e-06	9631
NUP155	nilotinib	-0.0045239	0.968227	9631
NUP155	nintedanib	0.0565363	0.296363	9631
NUP155	nutlin-3	0.0978918	0.0150852	9631
NUP155	obatoclax	-0.0637629	0.107799	9631
NUP155	olaparib	-0.0161817	0.725963	9631
NUP155	oligomycin A	0.00911625	0.843372	9631
NUP155	omacetaxine mepesuccinate	-0.107364	0.0187934	9631
NUP155	ouabain	-0.02013	0.632822	9631
NUP155	paclitaxel	-0.100358	0.00995291	9631
NUP155	palmostatin B	0.0344385	0.788905	9631
NUP155	pandacostat	0.0297373	0.550998	9631
NUP155	panobinostat	-0.0155025	0.709885	9631
NUP155	parbendazole	-0.0523524	0.176551	9631
NUP155	parthenolide	0.105452	0.0433455	9631
NUP155	pazopanib	-0.046171	0.269162	9631
NUP155	pevonedistat	-0.090596	0.024156	9631
NUP155	phloretin	-0.107052	0.00629873	9631
NUP155	pifithrin-alpha	-0.0796277	0.150118	9631
NUP155	pifithrin-mu	-0.0363916	0.392785	9631
NUP155	piperlongumine	0.0298751	0.460876	9631
NUP155	pitstop2	0.0152379	0.9517	9631
NUP155	pluripotin	0.00255058	0.970369	9631
NUP155	procarbazine	0.0127569	0.959809	9631
NUP155	prochlorperazine	-0.0257835	0.623963	9631
NUP155	purmorphamine	0.0621816	0.190443	9631
NUP155	pyrazolanthrone	0.00500713	0.944066	9631
NUP155	quizartinib	0.0311265	0.638525	9631
NUP155	regorafenib	0.0321254	0.553469	9631
NUP155	rigosertib	-0.1112	0.00443206	9631
NUP155	ruxolitinib	-0.0679818	0.11016	9631
NUP155	salermide	-0.0594498	0.534168	9631
NUP155	saracatinib	0.0350474	0.506119	9631
NUP155	selumetinib	0.0888724	0.0536358	9631
NUP155	semagacestat	-0.0462525	0.730248	9631
NUP155	serdemetan	0.0670935	0.104096	9631
NUP155	sildenafil	0.0687414	0.550627	9631
NUP155	silmitasertib	-0.0391552	0.662772	9631
NUP155	simvastatin	-0.0485442	0.415591	9631
NUP155	sirolimus	0.00640298	0.89062	9631
NUP155	sitagliptin	-0.0171377	0.997718	9631
NUP155	skepinone-L	-0.117867	0.0555739	9631
NUP155	sorafenib	0.0231949	0.632326	9631
NUP155	sotrastaurin	0.00693225	0.898645	9631
NUP155	spautin-1	-0.0862038	0.0673776	9631
NUP155	staurosporine	-0.0563693	0.694553	9631
NUP155	sunitinib	0.0319808	0.462366	9631
NUP155	tacedinaline	-0.049252	0.315327	9631
NUP155	tacrolimus	0.010983	0.83284	9631
NUP155	tamatinib	0.0227661	0.812596	9631
NUP155	tamoxifen	0.0440627	0.522014	9631
NUP155	tandutinib	0.130833	0.00187955	9631
NUP155	tanespimycin	-0.0172482	0.778591	9631
NUP155	temozolomide	0.0302532	0.678796	9631
NUP155	temsirolimus	0.0598144	0.362748	9631
NUP155	teniposide	-0.0321576	0.585499	9631
NUP155	thalidomide	-0.0425161	0.849581	9631
NUP155	tigecycline	0.0131705	0.854363	9631
NUP155	tipifarnib-P1	0.0836986	0.0351261	9631
NUP155	tipifarnib-P2	0.0908195	0.10772	9631
NUP155	tivantinib	-0.182353	0.00106005	9631
NUP155	tivozanib	-0.00140097	0.983134	9631
NUP155	topotecan	-0.0375472	0.349314	9631
NUP155	tosedostat	-0.0189049	0.699256	9631
NUP155	tozasertib	-0.164133	0.332666	9631
NUP155	trametinib	0.174641	0.00784951	9631
NUP155	tretinoin	0.00386208	0.937696	9631
NUP155	triazolothiadiazine	-0.0907548	0.0162657	9631
NUP155	trifluoperazine	0.0129042	0.841393	9631
NUP155	triptolide	-0.00597231	0.894908	9631
NUP155	tubastatin A	0.110117	0.0690986	9631
NUP155	valdecoxib	-0.0559338	0.176369	9631
NUP155	vandetanib	0.0429682	0.423241	9631
NUP155	veliparib	0.000758228	0.993982	9631
NUP155	vemurafenib	0.0366928	0.543575	9631
NUP155	vincristine	-0.0684474	0.0697866	9631
NUP155	vorapaxar	0.035906	0.480173	9631
NUP155	vorinostat	-0.0372965	0.358986	9631
NUP155	zebularine	-0.0633096	0.11893	9631
