# Supplementary material for: Pan-cancer analysis of NUP155 and validation of its role in breast cancer cell proliferation, migration, and apoptosis
Source: BMC Cancer. 2024 Mar 19;24:353. doi: 10.1186/s12885-024-12039-6 (PMC10953186; doi:10.1186/s12885-024-12039-6)
Supplement: Supplementary file 7 — Additional file 7: Supplementary figure 6. Association between NUP155 gene and the TIME in pan-cancer tissues, using the TISCH database. [file 12885_2024_12039_MOESM7_ESM.xlsx]

## Sheet: SheetName
Supplementary Table S5. The correlation between NUP155 expression levels and drug sensitivity in the GDSC database.
symbol	drug	cor	fdr	entrez
NUP155	(5Z)-7-Oxozeaenol	0.0993057	0.00961599	9631
NUP155	17-AAG	-0.0658911	0.0816659	9631
NUP155	5-Fluorouracil	0.135113	0.000142182	9631
NUP155	681640	-0.046743	0.440283	9631
NUP155	A-443654	-0.0232375	0.92251	9631
NUP155	A-770041	0.0686271	0.393358	9631
NUP155	AC220	0.0681282	0.125097	9631
NUP155	AG-014699	0.0470139	0.277779	9631
NUP155	AICAR	0.0663708	0.097566	9631
NUP155	AKT inhibitor VIII	-0.048574	0.287816	9631
NUP155	AMG-706	-0.0172344	0.813466	9631
NUP155	AP-24534	0.100482	0.0101537	9631
NUP155	AR-42	0.09343	0.0089894	9631
NUP155	AS601245	-0.0181666	0.779824	9631
NUP155	AS605240	0.110327	0.00499308	9631
NUP155	AT-7519	0.0425344	0.254598	9631
NUP155	ATRA	0.074158	0.103879	9631
NUP155	AUY922	-0.0075392	0.915441	9631
NUP155	AZ628	0.127937	0.0566271	9631
NUP155	AZD6482	0.0469149	0.312108	9631
NUP155	AZD7762	0.0680131	0.0914526	9631
NUP155	AZD8055	0.11409	0.00290421	9631
NUP155	Afatinib	-0.0258041	0.520481	9631
NUP155	Axitinib	0.00900585	0.898479	9631
NUP155	BAY 61-3606	0.0779894	0.0520486	9631
NUP155	BEZ235	0.0530427	0.270919	9631
NUP155	BHG712	0.164034	2.56939e-06	9631
NUP155	BI-2536	-0.0950951	0.307247	9631
NUP155	BIRB 0796	-0.0548436	0.278602	9631
NUP155	BIX02189	0.151662	1.6478e-05	9631
NUP155	BMS-509744	0.0563254	0.552372	9631
NUP155	BMS-536924	0.110938	0.0240233	9631
NUP155	BMS-708163	0.0622195	0.120511	9631
NUP155	BMS-754807	0.0550053	0.301	9631
NUP155	BMS345541	0.0753893	0.0372044	9631
NUP155	BX-795	0.079631	0.0638689	9631
NUP155	BX-912	0.11093	0.00162696	9631
NUP155	Belinostat	0.0684426	0.0682266	9631
NUP155	Bexarotene	0.0240361	0.781379	9631
NUP155	Bicalutamide	0.011058	0.837587	9631
NUP155	Bleomycin	-0.00553556	0.941506	9631
NUP155	Bleomycin (50 uM)	-0.0718533	0.0489087	9631
NUP155	Bortezomib	-0.040278	0.650683	9631
NUP155	Bosutinib	-0.00326333	0.964473	9631
NUP155	Bryostatin 1	0.0112	0.864613	9631
NUP155	CAL-101	0.110849	0.00237209	9631
NUP155	CAY10603	0.090563	0.0113655	9631
NUP155	CCT007093	0.0479351	0.27839	9631
NUP155	CCT018159	-0.000109654	0.998689	9631
NUP155	CEP-701	0.120728	0.00173695	9631
NUP155	CGP-082996	-0.00367819	0.979897	9631
NUP155	CGP-60474	0.013022	0.909663	9631
NUP155	CH5424802	0.00735157	0.928298	9631
NUP155	CHIR-99021	0.104078	0.00465175	9631
NUP155	CI-1040	0.125533	0.00154655	9631
NUP155	CMK	0.0206014	0.886953	9631
NUP155	CP466722	0.0836567	0.0198593	9631
NUP155	CP724714	0.0357642	0.529251	9631
NUP155	CUDC-101	0.0788557	0.0320787	9631
NUP155	CX-5461	0.096359	0.00784213	9631
NUP155	Camptothecin	0.0309157	0.520484	9631
NUP155	Cetuximab	0.0271403	0.538748	9631
NUP155	Cisplatin	-0.0566164	0.242861	9631
NUP155	Crizotinib	0.0742508	0.563407	9631
NUP155	Cyclopamine	0.100953	0.269594	9631
NUP155	Cytarabine	0.00860451	0.893622	9631
NUP155	DMOG	0.0346871	0.473103	9631
NUP155	Dabrafenib	0.132917	0.000584176	9631
NUP155	Dasatinib	0.0608601	0.377991	9631
NUP155	Docetaxel	-0.153102	2.9139e-05	9631
NUP155	Doxorubicin	-0.0346744	0.607144	9631
NUP155	EHT 1864	0.0467343	0.465964	9631
NUP155	EKB-569	0.076533	0.0510198	9631
NUP155	EX-527	0.0408755	0.700105	9631
NUP155	Elesclomol	-0.0821653	0.0528934	9631
NUP155	Embelin	-0.0366644	0.553496	9631
NUP155	Epothilone B	-0.0875403	0.0604196	9631
NUP155	Erlotinib	-0.0240514	0.767736	9631
NUP155	Etoposide	-0.0764067	0.0824784	9631
NUP155	FH535	-0.0316088	0.545259	9631
NUP155	FK866	0.0450551	0.233215	9631
NUP155	FMK	0.0993427	0.0667383	9631
NUP155	FR-180204	0.0774012	0.0980232	9631
NUP155	FTI-277	0.0486061	0.252574	9631
NUP155	Foretinib	0.106401	0.00521292	9631
NUP155	GDC0449	0.0181995	0.885376	9631
NUP155	GDC0941	0.0608517	0.238294	9631
NUP155	GNF-2	-0.043766	0.864369	9631
NUP155	GSK-650394	-0.0501935	0.466475	9631
NUP155	GSK1070916	0.0635176	0.0899716	9631
NUP155	GSK1904529A	-0.0203149	0.696531	9631
NUP155	GSK2126458	0.0942097	0.0104935	9631
NUP155	GSK269962A	0.0377159	0.485196	9631
NUP155	GSK429286A	0.0944031	0.0152696	9631
NUP155	GSK690693	0.052979	0.163305	9631
NUP155	GW 441756	-0.0471097	0.782511	9631
NUP155	GW-2580	0.0612889	0.71837	9631
NUP155	GW843682X	-0.118218	0.124109	9631
NUP155	Gefitinib	-0.0142746	0.757417	9631
NUP155	Gemcitabine	-0.0420041	0.406882	9631
NUP155	Genentech Cpd 10	0.0676824	0.0692792	9631
NUP155	HG-5-113-01	0.0210889	0.806117	9631
NUP155	HG-5-88-01	0.135887	0.111217	9631
NUP155	HG-6-64-1	0.0881618	0.0407331	9631
NUP155	I-BET-762	0.138686	5.8258e-05	9631
NUP155	IOX2	0.0214135	0.749679	9631
NUP155	IPA-3	0.0493923	0.222948	9631
NUP155	Imatinib	0.0442271	0.795766	9631
NUP155	Ispinesib Mesylate	0.0326709	0.402818	9631
NUP155	JNJ-26854165	0.0618098	0.200926	9631
NUP155	JNK Inhibitor VIII	-0.108052	0.00746099	9631
NUP155	JNK-9L	0.00917046	0.902956	9631
NUP155	JQ1	0.076232	0.0631716	9631
NUP155	JQ12	0.0451234	0.409941	9631
NUP155	JW-7-24-1	0.103836	0.00340875	9631
NUP155	JW-7-52-1	0.00139782	0.993423	9631
NUP155	KIN001-055	0.0175335	0.832066	9631
NUP155	KIN001-102	0.0902885	0.0109596	9631
NUP155	KIN001-135	0.0292349	0.812528	9631
NUP155	KIN001-236	0.150978	2.0778e-05	9631
NUP155	KIN001-244	0.0944441	0.00934192	9631
NUP155	KIN001-260	0.115502	0.00118873	9631
NUP155	KIN001-266	0.0892539	0.0418551	9631
NUP155	KIN001-270	0.0485792	0.228888	9631
NUP155	KU-55933	0.00304951	0.974855	9631
NUP155	LAQ824	0.0511174	0.208218	9631
NUP155	LFM-A13	0.0617116	0.203118	9631
NUP155	LY317615	0.104826	0.00893256	9631
NUP155	Lapatinib	-0.0300099	0.663673	9631
NUP155	Lenalidomide	-0.00459741	0.969873	9631
NUP155	Linifanib	0.10858	0.0101277	9631
NUP155	Lisitinib	0.054135	0.372896	9631
NUP155	MG-132	-0.0452019	0.640177	9631
NUP155	MK-2206	0.0528456	0.298266	9631
NUP155	MLN4924	-0.0548942	0.325181	9631
NUP155	MP470	0.0233985	0.619543	9631
NUP155	MPS-1-IN-1	0.0825563	0.0271138	9631
NUP155	MS-275	-0.0111389	0.918943	9631
NUP155	Masitinib	0.0905024	0.0142794	9631
NUP155	Methotrexate	0.146427	5.164e-05	9631
NUP155	Midostaurin	0.0589943	0.179144	9631
NUP155	Mitomycin C	-0.0393453	0.460018	9631
NUP155	NG-25	0.130449	0.000207151	9631
NUP155	NPK76-II-72-1	0.0446202	0.223254	9631
NUP155	NSC-207895	-0.0231343	0.647162	9631
NUP155	NSC-87877	-0.00265804	0.974045	9631
NUP155	NU-7441	0.0441128	0.540989	9631
NUP155	Navitoclax	0.138994	0.000135875	9631
NUP155	Nilotinib	0.0466637	0.367041	9631
NUP155	Nutlin-3a (-)	0.261306	5.51377e-12	9631
NUP155	OSI-027	0.0892808	0.0132121	9631
NUP155	OSI-930	0.112656	0.00243225	9631
NUP155	OSU-03012	-0.00283175	0.969335	9631
NUP155	Obatoclax Mesylate	-0.0129655	0.823082	9631
NUP155	Olaparib	0.0102	0.845705	9631
NUP155	PAC-1	0.105336	0.00788729	9631
NUP155	PD-0325901	0.104145	0.00719133	9631
NUP155	PD-0332991	0.137621	0.00190867	9631
NUP155	PD-173074	0.0439476	0.765264	9631
NUP155	PF-4708671	0.0481994	0.602679	9631
NUP155	PF-562271	0.0644791	0.222289	9631
NUP155	PFI-1	0.128266	0.00196598	9631
NUP155	PHA-665752	0.0999481	0.431258	9631
NUP155	PHA-793887	0.0766023	0.0311686	9631
NUP155	PI-103	0.0499006	0.181216	9631
NUP155	PIK-93	0.107982	0.00211407	9631
NUP155	PLX4720	0.0588609	0.15273	9631
NUP155	Paclitaxel	-0.0619893	0.574269	9631
NUP155	Parthenolide	0.0430529	0.700272	9631
NUP155	Pazopanib	0.0313641	0.597615	9631
NUP155	Phenformin	0.0783006	0.0346226	9631
NUP155	Pyrimethamine	0.0420893	0.732715	9631
NUP155	QL-VIII-58	-0.0412696	0.619752	9631
NUP155	QL-X-138	0.076397	0.0379378	9631
NUP155	QL-XI-92	0.0929941	0.00966403	9631
NUP155	QL-XII-47	0.0474792	0.246222	9631
NUP155	QL-XII-61	0.0773268	0.227142	9631
NUP155	QS11	-0.00704377	0.935242	9631
NUP155	RDEA119	0.159536	4.38381e-06	9631
NUP155	RO-3306	-0.0857094	0.0370052	9631
NUP155	Rapamycin	0.0449426	0.727548	9631
NUP155	Roscovitine	0.0559637	0.742485	9631
NUP155	Ruxolitinib	0.0603227	0.209475	9631
NUP155	S-Trityl-L-cysteine	-0.00978251	0.929889	9631
NUP155	SB 216763	0.0490763	0.32791	9631
NUP155	SB 505124	0.0166992	0.862227	9631
NUP155	SB52334	0.058778	0.193091	9631
NUP155	SB590885	0.0928989	0.0397548	9631
NUP155	SGC0946	0.0340249	0.546176	9631
NUP155	SL 0101-1	0.0645937	0.375378	9631
NUP155	SN-38	0.040813	0.37419	9631
NUP155	SNX-2112	0.107567	0.00269164	9631
NUP155	STF-62247	0.103028	0.00769768	9631
NUP155	Salubrinal	0.0839796	0.301877	9631
NUP155	Saracatinib	0.0195894	0.841381	9631
NUP155	Shikonin	0.01221	0.851254	9631
NUP155	Sorafenib	0.108745	0.214139	9631
NUP155	Sunitinib	0.140604	0.0314139	9631
NUP155	T0901317	0.0685877	0.0877855	9631
NUP155	TAE684	0.0508848	0.664172	9631
NUP155	TAK-715	0.0781768	0.031695	9631
NUP155	TG101348	0.156592	6.60964e-06	9631
NUP155	TGX221	0.064333	0.332771	9631
NUP155	THZ-2-102-1	0.0693825	0.0581602	9631
NUP155	THZ-2-49	0.068066	0.0671845	9631
NUP155	TL-1-85	0.129008	0.000255215	9631
NUP155	TL-2-105	0.061194	0.104744	9631
NUP155	TPCA-1	0.139762	5.7114e-05	9631
NUP155	TW 37	-0.0646053	0.140406	9631
NUP155	Talazoparib	0.0169557	0.745171	9631
NUP155	Tamoxifen	0.0572499	0.577816	9631
NUP155	Temozolomide	0.0127311	0.892386	9631
NUP155	Temsirolimus	0.0704661	0.12536	9631
NUP155	Thapsigargin	-0.0978736	0.0547363	9631
NUP155	Tipifarnib	-0.00598615	0.949736	9631
NUP155	Tivozanib	0.0695093	0.170466	9631
NUP155	Trametinib	0.140529	8.5276e-05	9631
NUP155	Tubastatin A	0.140881	5.6297e-05	9631
NUP155	UNC0638	0.138701	5.2435e-05	9631
NUP155	UNC1215	0.0996639	0.0260913	9631
NUP155	VNLG/124	0.102485	0.00812846	9631
NUP155	VX-11e	0.144681	0.000327494	9631
NUP155	VX-680	0.058866	0.537715	9631
NUP155	VX-702	0.0590596	0.733498	9631
NUP155	Veliparib	0.0327639	0.647871	9631
NUP155	Vinblastine	-0.0181821	0.723861	9631
NUP155	Vinorelbine	-0.0785978	0.110006	9631
NUP155	Vorinostat	0.0938438	0.0105872	9631
NUP155	WH-4-023	0.115331	0.101992	9631
NUP155	WZ-1-84	0.0386893	0.654134	9631
NUP155	WZ3105	0.0541173	0.140264	9631
NUP155	XAV939	-0.0420629	0.296981	9631
NUP155	XL-184	0.150414	0.000109499	9631
NUP155	XMD11-85h	0.129149	0.231591	9631
NUP155	XMD13-2	0.105597	0.00297629	9631
NUP155	XMD14-99	0.156705	1.2875e-05	9631
NUP155	XMD15-27	0.0842562	0.0511304	9631
NUP155	XMD8-85	0.183526	0.00575014	9631
NUP155	XMD8-92	0.0944166	0.293551	9631
NUP155	Y-39983	0.0980806	0.00743866	9631
NUP155	YK 4-279	-0.0399777	0.47404	9631
NUP155	YM155	-0.0729176	0.121473	9631
NUP155	YM201636	0.0725488	0.0493395	9631
NUP155	Z-LLNle-CHO	0.0507736	0.521899	9631
NUP155	ZG-10	0.0490225	0.481106	9631
NUP155	ZM-447439	0.0398822	0.411687	9631
NUP155	ZSTK474	0.095615	0.00794596	9631
NUP155	Zibotentan	0.0405932	0.861058	9631
NUP155	piperlongumine	-0.0151468	0.768781	9631
NUP155	rTRAIL	-0.0397618	0.59343	9631
NUP155	selumetinib	0.148182	2.3714e-05	9631
