# Supplementary material for: Pan-cancer analysis of NUP155 and validation of its role in breast cancer cell proliferation, migration, and apoptosis
Source: BMC Cancer. 2024 Mar 19;24:353. doi: 10.1186/s12885-024-12039-6 (PMC10953186; doi:10.1186/s12885-024-12039-6)
Supplement: Supplementary file 8 — Additional file 8: Supplementary figure 7. Reactome functional annotation of NUP155 in various cancers, including (A) CHOL, (B) PCPG, (C) KICH, (D) TGCT, (E) KIRC, (F) THCA, (G) PAAD, (H) THYM. [file 12885_2024_12039_MOESM8_ESM.xlsx]

## Sheet: CHOL
Supplementary Table S6. The enrichment analysis of NUP155 in the REACTOME pathway-CHOL
Description	GeneRatio	BgRatio	pvalue	p.adjust	qvalue	geneID	Count
M_PHASE	13/65	417/10968	7.79697e-07	0.000348525	0.000296285	NIPBL/HAUS2/SMC2/AHCTF1/TNPO1/NEDD1/TAOK1/PSME3/CENPL/XPO1/CDC27/NUP160/CDC23	13
CELL_CYCLE	16/65	693/10968	1.90349e-06	0.00042543	0.000361663	RAD1/NIPBL/HAUS2/SMC2/AHCTF1/TNPO1/NEDD1/LIN9/TAOK1/PSME3/CENPL/XPO1/CDC27/NUP160/CDC23/HERC2	16
MITOTIC_SPINDLE_CHECKPOINT	7/65	111/10968	3.85882e-06	0.000433391	0.000368431	AHCTF1/TAOK1/CENPL/XPO1/CDC27/NUP160/CDC23	7
CELL_CYCLE_MITOTIC	14/65	561/10968	3.87822e-06	0.000433391	0.000368431	NIPBL/HAUS2/SMC2/AHCTF1/TNPO1/NEDD1/LIN9/TAOK1/PSME3/CENPL/XPO1/CDC27/NUP160/CDC23	14
CELL_CYCLE_CHECKPOINTS	10/65	292/10968	7.51803e-06	0.000672112	0.00057137	RAD1/AHCTF1/TAOK1/PSME3/CENPL/XPO1/CDC27/NUP160/CDC23/HERC2	10
MITOTIC_METAPHASE_AND_ANAPHASE	9/65	236/10968	9.5059e-06	0.00070819	0.000602041	AHCTF1/TNPO1/TAOK1/PSME3/CENPL/XPO1/CDC27/NUP160/CDC23	9
SEPARATION_OF_SISTER_CHROMATIDS	8/65	191/10968	1.57747e-05	0.00100733	0.000856339	AHCTF1/TAOK1/PSME3/CENPL/XPO1/CDC27/NUP160/CDC23	8
MITOTIC_PROMETAPHASE	8/65	203/10968	2.45071e-05	0.00136933	0.00116409	HAUS2/SMC2/AHCTF1/NEDD1/TAOK1/CENPL/XPO1/NUP160	8
METABOLISM_OF_RNA	12/65	672/10968	0.000508108	0.0234648	0.0199477	NSUN2/HEATR1/TNPO1/PSME3/CHERP/XPO1/NUP160/WDR36/CSTF3/CDC40/TTC37/GCFC2	12
POSTMITOTIC_NUCLEAR_PORE_COMPLEX_NPC_REFORMATION	3/65	27/10968	0.00052494	0.0234648	0.0199477	AHCTF1/TNPO1/NUP160	3
RESOLUTION_OF_SISTER_CHROMATID_COHESION	5/65	126/10968	0.000879715	0.0357484	0.0303902	AHCTF1/TAOK1/CENPL/XPO1/NUP160	5
RHO_GTPASES_ACTIVATE_FORMINS	5/65	140/10968	0.00140958	0.0525067	0.0446366	AHCTF1/TAOK1/CENPL/XPO1/NUP160	5
INTERLEUKIN_6_SIGNALING	2/65	11/10968	0.00183767	0.0586741	0.0498795	STAT3/PTPN11	2
SIGNALING_BY_LEPTIN	2/65	11/10968	0.00183767	0.0586741	0.0498795	STAT3/PTPN11	2
INTRA_GOLGI_TRAFFIC	3/65	44/10968	0.0022123	0.0659267	0.056045	GOSR1/NSF/COG5	3
RETROGRADE_TRANSPORT_AT_THE_TRANS_GOLGI_NETWORK	3/65	49/10968	0.00301348	0.0801537	0.0681396	NSF/COG5/TGOLN2	3
DNA_DOUBLE_STRAND_BREAK_REPAIR	5/65	167/10968	0.00304835	0.0801537	0.0681396	RAD1/LIG3/BAZ1B/PRKDC/HERC2	5
TRANSPORT_TO_THE_GOLGI_AND_SUBSEQUENT_MODIFICATION	5/65	186/10968	0.00482465	0.119812	0.101854	MANEA/GOSR1/NSF/COG5/MIA3	5
ABERRANT_REGULATION_OF_MITOTIC_EXIT_IN_CANCER_DUE_TO_RB1_DEFECTS	2/65	20/10968	0.00613394	0.12579	0.106936	CDC27/CDC23	2
CONVERSION_FROM_APC_C_CDC20_TO_APC_C_CDH1_IN_LATE_ANAPHASE	2/65	20/10968	0.00613394	0.12579	0.106936	CDC27/CDC23	2
PHOSPHORYLATION_OF_THE_APC_C	2/65	20/10968	0.00613394	0.12579	0.106936	CDC27/CDC23	2
MITOTIC_G2_G2_M_PHASES	5/65	200/10968	0.00653549	0.12579	0.106936	HAUS2/NEDD1/LIN9/PSME3/XPO1	5
INHIBITION_OF_THE_PROTEOLYTIC_ACTIVITY_OF_APC_C_REQUIRED_FOR_THE_ONSET_OF_ANAPHASE_BY_MITOTIC_SPINDLE_CHECKPOINT_COMPONENTS	2/65	21/10968	0.00675385	0.12579	0.106936	CDC27/CDC23	2
INTERLEUKIN_37_SIGNALING	2/65	21/10968	0.00675385	0.12579	0.106936	STAT3/PTPN11	2
RHOBTB2_GTPASE_CYCLE	2/65	23/10968	0.00807508	0.139077	0.118231	PHIP/CUL3	2
POST_TRANSLATIONAL_PROTEIN_MODIFICATION	16/65	1435/10968	0.00827194	0.139077	0.118231	SUZ12/ZNF131/OTULIN/MANEA/GOSR1/NSF/PSME3/TRRAP/CUL3/COG5/MIA3/PRKDC/NUP160/TGOLN2/USP42/HERC2	16
INTERLEUKIN_6_FAMILY_SIGNALING	2/65	24/10968	0.00877573	0.139077	0.118231	STAT3/PTPN11	2
APC_C_CDC20_MEDIATED_DEGRADATION_OF_CYCLIN_B	2/65	24/10968	0.00877573	0.139077	0.118231	CDC27/CDC23	2
APC_C_CDH1_MEDIATED_DEGRADATION_OF_CDC20_AND_OTHER_APC_C_CDH1_TARGETED_PROTEINS_IN_LATE_MITOSIS_EARLY_G1	3/65	74/10968	0.00954713	0.139077	0.118231	PSME3/CDC27/CDC23	3
ANTIGEN_PROCESSING_UBIQUITINATION_PROTEASOME_DEGRADATION	6/65	308/10968	0.00961648	0.139077	0.118231	UBE3C/PSME3/CUL3/CDC27/CDC23/HERC2	6
INTERLEUKIN_20_FAMILY_SIGNALING	2/65	26/10968	0.0102555	0.139077	0.118231	STAT3/PTPN11	2
APC_CDC20_MEDIATED_DEGRADATION_OF_NEK2A	2/65	26/10968	0.0102555	0.139077	0.118231	CDC27/CDC23	2
NUCLEAR_ENVELOPE_NE_REASSEMBLY	3/65	76/10968	0.0102674	0.139077	0.118231	AHCTF1/TNPO1/NUP160	3
HIV_LIFE_CYCLE	4/65	149/10968	0.0116687	0.150232	0.127714	VTA1/TAF2/XPO1/NUP160	4
HIV_INFECTION	5/65	231/10968	0.0117631	0.150232	0.127714	VTA1/PSME3/TAF2/XPO1/NUP160	5
DOWNSTREAM_SIGNAL_TRANSDUCTION	2/65	29/10968	0.0126663	0.154957	0.13173	STAT3/PTPN11	2
RNA_POLYMERASE_II_TRANSCRIPTION	15/65	1374/10968	0.0128972	0.154957	0.13173	ICE1/RAD1/SUZ12/INTS2/PSME3/CDK12/TAF2/MAML1/MED23/CDC27/PTPN11/CDC23/CSTF3/CDC40/APAF1	15
ER_TO_GOLGI_ANTEROGRADE_TRANSPORT	4/65	155/10968	0.0133319	0.154957	0.13173	GOSR1/NSF/COG5/MIA3	4
SIGNALING_BY_CSF3_G_CSF	2/65	30/10968	0.0135197	0.154957	0.13173	STAT3/PTPN11	2
PROCESSING_OF_CAPPED_INTRON_CONTAINING_PRE_MRNA	5/65	242/10968	0.0141559	0.158192	0.134481	CHERP/NUP160/CSTF3/CDC40/GCFC2	5
REGULATION_OF_MRNA_STABILITY_BY_PROTEINS_THAT_BIND_AU_RICH_ELEMENTS	3/65	87/10968	0.0147858	0.160661	0.13658	TNPO1/PSME3/XPO1	3
APC_C_MEDIATED_DEGRADATION_OF_CELL_CYCLE_PROTEINS	3/65	88/10968	0.015244	0.160661	0.13658	PSME3/CDC27/CDC23	3
S_PHASE	4/65	162/10968	0.0154551	0.160661	0.13658	LIN9/PSME3/CDC27/CDC23	4
EXPORT_OF_VIRAL_RIBONUCLEOPROTEINS_FROM_NUCLEUS	2/65	33/10968	0.0162246	0.164827	0.140121	XPO1/NUP160	2
SWITCHING_OF_ORIGINS_TO_A_POST_REPLICATIVE_STATE	3/65	91/10968	0.0166665	0.165554	0.140739	PSME3/CDC27/CDC23	3
TRANSCRIPTIONAL_REGULATION_BY_E2F6	2/65	34/10968	0.0171734	0.166881	0.141867	SUZ12/APAF1	2
RHOBTB_GTPASE_CYCLE	2/65	35/10968	0.0181454	0.168979	0.143651	PHIP/CUL3	2
REGULATION_OF_TNFR1_SIGNALING	2/65	35/10968	0.0181454	0.168979	0.143651	SPPL2A/OTULIN	2
INTERACTIONS_OF_REV_WITH_HOST_CELLULAR_PROTEINS	2/65	37/10968	0.0201576	0.183886	0.156324	XPO1/NUP160	2
DISEASES_OF_MITOTIC_CELL_CYCLE	2/65	38/10968	0.0211971	0.189502	0.161098	CDC27/CDC23	2
COPI_MEDIATED_ANTEROGRADE_TRANSPORT	3/65	102/10968	0.022502	0.197223	0.167662	GOSR1/NSF/COG5	3
CLASS_I_MHC_MEDIATED_ANTIGEN_PROCESSING_PRESENTATION	6/65	377/10968	0.0238178	0.200808	0.170709	UBE3C/PSME3/CUL3/CDC27/CDC23/HERC2	6
TRANSCRIPTIONAL_REGULATION_BY_VENTX	2/65	41/10968	0.0244464	0.200808	0.170709	CDC27/CDC23	2
SUMOYLATION	4/65	187/10968	0.0247293	0.200808	0.170709	SUZ12/ZNF131/NUP160/HERC2	4
SIGNALING_BY_RHO_GTPASES_MIRO_GTPASES_AND_RHOBTB3	9/65	717/10968	0.0247352	0.200808	0.170709	AHCTF1/PHIP/TAOK1/TRIO/CENPL/CUL3/XPO1/NUP160/OSBPL11	9
MRNA_SPLICING	4/65	188/10968	0.0251572	0.200808	0.170709	CHERP/CSTF3/CDC40/GCFC2	4
SIGNALING_BY_SCF_KIT	2/65	43/10968	0.0267184	0.209529	0.178123	STAT3/PTPN11	2
TNF_SIGNALING	2/65	44/10968	0.0278854	0.21401	0.181932	SPPL2A/OTULIN	2
SENESCENCE_ASSOCIATED_SECRETORY_PHENOTYPE_SASP	3/65	112/10968	0.028656	0.21401	0.181932	CDC27/STAT3/CDC23	3
MET_ACTIVATES_PTPN11	1/65	5/10968	0.0292878	0.21401	0.181932	PTPN11	1
N_GLYCAN_TRIMMING_AND_ELONGATION_IN_THE_CIS_GOLGI	1/65	5/10968	0.0292878	0.21401	0.181932	MANEA	1
CELLULAR_SENESCENCE	4/65	198/10968	0.0296836	0.21401	0.181932	SUZ12/CDC27/STAT3/CDC23	4
CILIUM_ASSEMBLY	4/65	202/10968	0.0316214	0.224319	0.190697	HAUS2/TNPO1/NEDD1/TTC21B	4
INTRA_GOLGI_AND_RETROGRADE_GOLGI_TO_ER_TRAFFIC	4/65	203/10968	0.0321173	0.224319	0.190697	GOSR1/NSF/COG5/TGOLN2	4
ASPARAGINE_N_LINKED_GLYCOSYLATION	5/65	305/10968	0.0342466	0.232065	0.197281	MANEA/GOSR1/NSF/COG5/MIA3	5
ACTIVATION_OF_CASPASES_THROUGH_APOPTOSOME_MEDIATED_CLEAVAGE	1/65	6/10968	0.0350432	0.232065	0.197281	APAF1	1
PRE_NOTCH_PROCESSING_IN_THE_ENDOPLASMIC_RETICULUM	1/65	6/10968	0.0350432	0.232065	0.197281	POFUT1	1
NETRIN_1_SIGNALING	2/65	50/10968	0.035303	0.232065	0.197281	TRIO/PTPN11	2
CYTOPROTECTION_BY_HMOX1	3/65	124/10968	0.0371031	0.240364	0.204336	PSME3/CUL3/STAT3	3
DNA_REPLICATION	3/65	128/10968	0.0401732	0.249616	0.212201	PSME3/CDC27/CDC23	3
INTRAFLAGELLAR_TRANSPORT	2/65	54/10968	0.0406246	0.249616	0.212201	TNPO1/TTC21B	2
STAT5_ACTIVATION	1/65	7/10968	0.040765	0.249616	0.212201	PTPN11	1
APEX1_INDEPENDENT_RESOLUTION_OF_AP_SITES_VIA_THE_SINGLE_NUCLEOTIDE_REPLACEMENT_PATHWAY	1/65	7/10968	0.040765	0.249616	0.212201	LIG3	1
INTRINSIC_PATHWAY_FOR_APOPTOSIS	2/65	55/10968	0.0419997	0.250233	0.212726	STAT3/APAF1	2
HOST_INTERACTIONS_OF_HIV_FACTORS	3/65	131/10968	0.0425582	0.250233	0.212726	PSME3/XPO1/NUP160	3
RHO_GTPASE_EFFECTORS	5/65	324/10968	0.0426491	0.250233	0.212726	AHCTF1/TAOK1/CENPL/XPO1/NUP160	5
GOLGI_ASSOCIATED_VESICLE_BIOGENESIS	2/65	56/10968	0.0433922	0.250233	0.212726	AP4E1/TGOLN2	2
DEGRADATION_OF_DVL	2/65	57/10968	0.0448018	0.250233	0.212726	PSME3/CUL3	2
SIGNALING_BY_PDGF	2/65	58/10968	0.0462283	0.250233	0.212726	STAT3/PTPN11	2
SMAC_XIAP_REGULATED_APOPTOTIC_RESPONSE	1/65	8/10968	0.0464533	0.250233	0.212726	APAF1	1
NETRIN_MEDIATED_REPULSION_SIGNALS	1/65	8/10968	0.0464533	0.250233	0.212726	PTPN11	1
HUR_ELAVL1_BINDS_AND_STABILIZES_MRNA	1/65	8/10968	0.0464533	0.250233	0.212726	XPO1	1
DNA_REPAIR	5/65	332/10968	0.0465309	0.250233	0.212726	RAD1/LIG3/BAZ1B/PRKDC/HERC2	5
HOMOLOGY_DIRECTED_REPAIR	3/65	138/10968	0.0483946	0.250233	0.212726	RAD1/LIG3/HERC2	3
RRNA_MODIFICATION_IN_THE_NUCLEUS_AND_CYTOSOL	2/65	60/10968	0.049131	0.250233	0.212726	HEATR1/WDR36	2
TCF_DEPENDENT_SIGNALING_IN_RESPONSE_TO_WNT	4/65	234/10968	0.0497799	0.250233	0.212726	PSME3/TRRAP/CUL3/XPO1	4

## Sheet: PCPG
Supplementary Table S6. The enrichment analysis of NUP155 in the REACTOME pathway-PCPG
Description	GeneRatio	BgRatio	pvalue	p.adjust	qvalue	geneID	Count
METABOLISM_OF_RNA	18/77	672/10968	6.34207e-07	0.000216899	0.000167564	DHX9/SF3B3/POLR2B/CNOT1/NUP205/GEMIN5/DDX46/PAIP1/NUP153/DHX38/CSTF2/XRN2/UTP14C/CRNKL1/XPO1/NUP133/SMG8/UTP20	18
PROCESSING_OF_CAPPED_INTRON_CONTAINING_PRE_MRNA	10/77	242/10968	6.81166e-06	0.00116479	0.000899856	DHX9/SF3B3/POLR2B/NUP205/DDX46/NUP153/DHX38/CSTF2/CRNKL1/NUP133	10
EXPORT_OF_VIRAL_RIBONUCLEOPROTEINS_FROM_NUCLEUS	4/77	33/10968	7.87296e-05	0.00850871	0.00657337	NUP205/NUP153/XPO1/NUP133	4
DNA_REPAIR	10/77	332/10968	0.000102142	0.00850871	0.00657337	POLR2B/MDC1/RNF111/PARG/SMARCA5/RFC1/PRKDC/POLH/FTO/BAZ1B	10
INTERACTIONS_OF_REV_WITH_HOST_CELLULAR_PROTEINS	4/77	37/10968	0.000124396	0.00850871	0.00657337	NUP205/NUP153/XPO1/NUP133	4
ASSOCIATION_OF_TRIC_CCT_WITH_TARGET_PROTEINS_DURING_BIOSYNTHESIS	4/77	39/10968	0.000153283	0.00873713	0.00674983	AP3M1/LONP2/XRN2/CCT5	4
SUMOYLATION_OF_DNA_DAMAGE_RESPONSE_AND_REPAIR_PROTEINS	5/77	77/10968	0.000199218	0.00936156	0.00723223	NUP205/MDC1/NUP153/NUP133/SMC3	5
PROTEIN_UBIQUITINATION	5/77	79/10968	0.000224781	0.00936156	0.00723223	RNF20/WAC/USP9X/PRKDC/CDC73	5
VIRAL_MESSENGER_RNA_SYNTHESIS	4/77	44/10968	0.000246357	0.00936156	0.00723223	POLR2B/NUP205/NUP153/NUP133	4
CELL_CYCLE	14/77	693/10968	0.000288812	0.00987737	0.00763072	POLR2B/NUP205/MDC1/PHF8/FBXW11/SMARCA5/POLA1/RFC1/NUP153/NIPBL/XPO1/NUP133/KIF2A/SMC3	14
MRNA_SPLICING	7/77	188/10968	0.000339753	0.0105632	0.00816058	DHX9/SF3B3/POLR2B/DDX46/DHX38/CSTF2/CRNKL1	7
GENE_SILENCING_BY_RNA	6/77	140/10968	0.000437855	0.0124789	0.00964049	DROSHA/POLR2B/NUP205/NUP153/NUP133/IPO8	6
SNRNP_ASSEMBLY	4/77	54/10968	0.000544275	0.0143186	0.0110618	NUP205/GEMIN5/NUP153/NUP133	4
HIV_LIFE_CYCLE	6/77	149/10968	0.000609464	0.0148883	0.0115019	POLR2B/NUP205/NUP153/VPS4B/XPO1/NUP133	6
TRNA_PROCESSING_IN_THE_NUCLEUS	4/77	59/10968	0.000762808	0.0152427	0.0117757	NUP205/NUP153/CSTF2/NUP133	4
E3_UBIQUITIN_LIGASES_UBIQUITINATE_TARGET_PROTEINS	4/77	59/10968	0.000762808	0.0152427	0.0117757	RNF20/WAC/PRKDC/CDC73	4
MISCELLANEOUS_TRANSPORT_AND_BINDING_EVENTS	3/77	26/10968	0.000770086	0.0152427	0.0117757	NIPA2/MMGT1/ADD1	3
INFLUENZA_INFECTION	6/77	157/10968	0.000802247	0.0152427	0.0117757	POLR2B/NUP205/NUP153/CLTC/XPO1/NUP133	6
TRANSCRIPTIONAL_REGULATION_BY_SMALL_RNAS	5/77	107/10968	0.000910353	0.0163864	0.0126592	POLR2B/NUP205/NUP153/NUP133/IPO8	5
DNA_DOUBLE_STRAND_BREAK_REPAIR	6/77	167/10968	0.00110601	0.0189128	0.014611	MDC1/SMARCA5/RFC1/PRKDC/POLH/BAZ1B	6
REGULATION_OF_GLUCOKINASE_BY_GLUCOKINASE_REGULATORY_PROTEIN	3/77	32/10968	0.00142533	0.0232126	0.0179328	NUP205/NUP153/NUP133	3
NUCLEAR_IMPORT_OF_REV_PROTEIN	3/77	34/10968	0.00170237	0.0261421	0.020196	NUP205/NUP153/NUP133	3
CELL_CYCLE_MITOTIC	11/77	561/10968	0.0017581	0.0261421	0.020196	NUP205/PHF8/FBXW11/POLA1/RFC1/NUP153/NIPBL/XPO1/NUP133/KIF2A/SMC3	11
SUMOYLATION_OF_SUMOYLATION_PROTEINS	3/77	35/10968	0.00185263	0.0263999	0.0203951	NUP205/NUP153/NUP133	3
TRANSPORT_OF_THE_SLBP_DEPENDANT_MATURE_MRNA	3/77	36/10968	0.00201091	0.0264512	0.0204347	NUP205/NUP153/NUP133	3
NUCLEAR_PORE_COMPLEX_NPC_DISASSEMBLY	3/77	36/10968	0.00201091	0.0264512	0.0204347	NUP205/NUP153/NUP133	3
COHESIN_LOADING_ONTO_CHROMATIN	2/77	10/10968	0.00211082	0.0265949	0.0205458	NIPBL/SMC3	2
INTERACTIONS_OF_VPR_WITH_HOST_CELLULAR_PROTEINS	3/77	37/10968	0.00217736	0.0265949	0.0205458	NUP205/NUP153/NUP133	3
SUMOYLATION_OF_UBIQUITINYLATION_PROTEINS	3/77	39/10968	0.00253538	0.0299	0.0230991	NUP205/NUP153/NUP133	3
TRANSPORT_OF_MATURE_TRANSCRIPT_TO_CYTOPLASM	4/77	84/10968	0.00283374	0.0323	0.0249532	NUP205/NUP153/DHX38/NUP133	4
NS1_MEDIATED_EFFECTS_ON_HOST_PATHWAYS	3/77	41/10968	0.00292778	0.0323	0.0249532	NUP205/NUP153/NUP133	3
TRANSPORT_OF_MATURE_MRNAS_DERIVED_FROM_INTRONLESS_TRANSCRIPTS	3/77	43/10968	0.0033556	0.035863	0.0277058	NUP205/NUP153/NUP133	3
MITOTIC_TELOPHASE_CYTOKINESIS	2/77	13/10968	0.00360917	0.0374041	0.0288964	NIPBL/SMC3	2
SUMOYLATION_OF_DNA_REPLICATION_PROTEINS	3/77	46/10968	0.00406589	0.0408981	0.0315956	NUP205/NUP153/NUP133	3
POLYMERASE_SWITCHING	2/77	14/10968	0.00419161	0.040958	0.0316419	POLA1/RFC1	2
SUMOYLATION_OF_RNA_BINDING_PROTEINS	3/77	47/10968	0.00432139	0.0410532	0.0317155	NUP205/NUP153/NUP133	3
PROTEIN_FOLDING	4/77	98/10968	0.0049281	0.0455516	0.0351907	AP3M1/LONP2/XRN2/CCT5	4
HIV_INFECTION	6/77	231/10968	0.00558473	0.0502626	0.0388301	POLR2B/NUP205/NUP153/VPS4B/XPO1/NUP133	6
NUCLEAR_ENVELOPE_BREAKDOWN	3/77	53/10968	0.00605833	0.0531269	0.041043	NUP205/NUP153/NUP133	3
TRNA_PROCESSING	4/77	111/10968	0.00763126	0.064228	0.0496191	NUP205/NUP153/CSTF2/NUP133	4
TRANSLESION_SYNTHESIS_BY_POLH	2/77	19/10968	0.00769985	0.064228	0.0496191	RFC1/POLH	2
LAGGING_STRAND_SYNTHESIS	2/77	20/10968	0.00851672	0.069011	0.0533141	POLA1/RFC1	2
M_PHASE	8/77	417/10968	0.00867682	0.069011	0.0533141	NUP205/PHF8/NUP153/NIPBL/XPO1/NUP133/KIF2A/SMC3	8
SUMOYLATION	5/77	187/10968	0.0100275	0.0779411	0.060213	NUP205/MDC1/NUP153/NUP133/SMC3	5
DOWNREGULATION_OF_SMAD2_3_SMAD4_TRANSCRIPTIONAL_ACTIVITY	2/77	23/10968	0.0111878	0.085027	0.0656872	RNF111/USP9X	2
RESOLUTION_OF_SISTER_CHROMATID_COHESION	4/77	126/10968	0.0117899	0.0876551	0.0677175	XPO1/NUP133/KIF2A/SMC3	4
MEMBRANE_TRAFFICKING	10/77	629/10968	0.0121836	0.0886554	0.0684904	SEC24B/GAPVD1/RALGAPB/VPS4B/DENND4C/SNX2/CLTC/UBQLN2/KIF2A/EXOC2	10
RESOLUTION_OF_AP_SITES_VIA_THE_MULTIPLE_NUCLEOTIDE_PATCH_REPLACEMENT_PATHWAY	2/77	25/10968	0.0131467	0.0888622	0.0686501	PARG/RFC1	2
MICRORNA_MIRNA_BIOGENESIS	2/77	25/10968	0.0131467	0.0888622	0.0686501	DROSHA/POLR2B	2
DEADENYLATION_OF_MRNA	2/77	25/10968	0.0131467	0.0888622	0.0686501	CNOT1/PAIP1	2
HOST_INTERACTIONS_OF_HIV_FACTORS	4/77	131/10968	0.013445	0.0888622	0.0686501	NUP205/NUP153/XPO1/NUP133	4
SUMOYLATION_OF_CHROMATIN_ORGANIZATION_PROTEINS	3/77	71/10968	0.0135112	0.0888622	0.0686501	NUP205/NUP153/NUP133	3
GLYCOLYSIS	3/77	72/10968	0.0140287	0.0897948	0.0693706	NUP205/NUP153/NUP133	3
POLYMERASE_SWITCHING_ON_THE_C_STRAND_OF_THE_TELOMERE	2/77	26/10968	0.0141781	0.0897948	0.0693706	POLA1/RFC1	2
SIGNALING_BY_TGF_BETA_RECEPTOR_COMPLEX	3/77	73/10968	0.0145573	0.0905199	0.0699307	RNF111/USP9X/XPO1	3
POSTMITOTIC_NUCLEAR_PORE_COMPLEX_NPC_REFORMATION	2/77	27/10968	0.0152434	0.0930937	0.0719191	NUP205/NUP133	2
CLASS_I_MHC_MEDIATED_ANTIGEN_PROCESSING_PRESENTATION	7/77	377/10968	0.0163915	0.098349	0.0759791	HUWE1/CUL2/RNF111/FBXW11/SEC24B/KLHL20/ITCH	7
CHROMOSOME_MAINTENANCE	4/77	140/10968	0.0167834	0.0989642	0.0764543	POLR2B/SMARCA5/POLA1/RFC1	4
DNA_DOUBLE_STRAND_BREAK_RESPONSE	3/77	78/10968	0.0173689	0.100681	0.0777805	MDC1/SMARCA5/BAZ1B	3
MITOTIC_PROPHASE	4/77	143/10968	0.0180017	0.10261	0.0792707	NUP205/PHF8/NUP153/NUP133	4
RNA_POLYMERASE_II_TRANSCRIBES_SNRNA_GENES	3/77	81/10968	0.0191915	0.107503	0.0830513	ICE1/POLR2B/RPRD1B	3
ANTIVIRAL_MECHANISM_BY_IFN_STIMULATED_GENES	3/77	82/10968	0.0198217	0.107503	0.0830513	NUP205/NUP153/NUP133	3
REGULATION_OF_HSF1_MEDIATED_HEAT_SHOCK_RESPONSE	3/77	82/10968	0.0198217	0.107503	0.0830513	NUP205/NUP153/NUP133	3
ANTIGEN_PROCESSING_UBIQUITINATION_PROTEASOME_DEGRADATION	6/77	308/10968	0.0209202	0.107503	0.0830513	HUWE1/CUL2/RNF111/FBXW11/KLHL20/ITCH	6
SIGNALING_BY_HEDGEHOG	4/77	150/10968	0.0210552	0.107503	0.0830513	CDC73/ITCH/CSNK1A1/WDR35	4
DNA_STRAND_ELONGATION	2/77	32/10968	0.0210606	0.107503	0.0830513	POLA1/RFC1	2
TERMINATION_OF_TRANSLESION_DNA_SYNTHESIS	2/77	32/10968	0.0210606	0.107503	0.0830513	RFC1/POLH	2
RHOV_GTPASE_CYCLE	2/77	33/10968	0.0223187	0.111305	0.085988	USP9X/CLTC	2
HEDGEHOG_ON_STATE	3/77	86/10968	0.0224562	0.111305	0.085988	CDC73/ITCH/CSNK1A1	3
RHOU_GTPASE_CYCLE	2/77	34/10968	0.0236073	0.113714	0.0878491	USP9X/CLTC	2
TELOMERE_C_STRAND_LAGGING_STRAND_SYNTHESIS	2/77	34/10968	0.0236073	0.113714	0.0878491	POLA1/RFC1	2
MITOTIC_METAPHASE_AND_ANAPHASE	5/77	236/10968	0.0249558	0.11854	0.0915776	NUP205/XPO1/NUP133/KIF2A/SMC3	5
GLUCOSE_METABOLISM	3/77	92/10968	0.0267495	0.125319	0.0968149	NUP205/NUP153/NUP133	3
RESOLUTION_OF_ABASIC_SITES_AP_SITES	2/77	38/10968	0.029056	0.134071	0.103576	PARG/RFC1	2
VESICLE_MEDIATED_TRANSPORT	10/77	724/10968	0.0294015	0.134071	0.103576	SEC24B/GAPVD1/RALGAPB/VPS4B/DENND4C/SNX2/CLTC/UBQLN2/KIF2A/EXOC2	10
TRANSLESION_SYNTHESIS_BY_Y_FAMILY_DNA_POLYMERASES_BYPASSES_LESIONS_ON_DNA_TEMPLATE	2/77	39/10968	0.0304896	0.137203	0.105996	RFC1/POLH	2
SLC_TRANSPORTER_DISORDERS	3/77	99/10968	0.0322746	0.14335	0.110744	NUP205/NUP153/NUP133	3
CELLULAR_RESPONSE_TO_HEAT_STRESS	3/77	101/10968	0.0339548	0.148879	0.115016	NUP205/NUP153/NUP133	3
SIGNALING_BY_TGFB_FAMILY_MEMBERS	3/77	102/10968	0.0348117	0.150704	0.116426	RNF111/USP9X/XPO1	3
TRANSCRIPTIONAL_ACTIVITY_OF_SMAD2_SMAD3_SMAD4_HETEROTRIMER	2/77	44/10968	0.0380629	0.162719	0.125708	RNF111/USP9X	2
NUCLEOTIDE_EXCISION_REPAIR	3/77	110/10968	0.0420673	0.177618	0.137218	POLR2B/RNF111/RFC1	3
MITOTIC_SPINDLE_CHECKPOINT	3/77	111/10968	0.0430239	0.179441	0.138626	XPO1/NUP133/KIF2A	3
DNA_DAMAGE_BYPASS	2/77	48/10968	0.0445821	0.179527	0.138693	RFC1/POLH	2
TELOMERE_MAINTENANCE	3/77	113/10968	0.0449697	0.179527	0.138693	POLR2B/POLA1/RFC1	3
HEDGEHOG_OFF_STATE	3/77	113/10968	0.0449697	0.179527	0.138693	ITCH/CSNK1A1/WDR35	3
SEPARATION_OF_SISTER_CHROMATIDS	4/77	191/10968	0.0451443	0.179527	0.138693	XPO1/NUP133/KIF2A/SMC3	4
HCMV_LATE_EVENTS	3/77	116/10968	0.0479696	0.18496	0.14289	NUP205/NUP153/NUP133	3
HDMS_DEMETHYLATE_HISTONES	2/77	50/10968	0.047986	0.18496	0.14289	PHF8/KDM3B	2
DEX_H_BOX_HELICASES_ACTIVATE_TYPE_I_IFN_AND_INFLAMMATORY_CYTOKINES_PRODUCTION	1/77	7/10968	0.0481329	0.18496	0.14289	DHX9	1
EXTENSION_OF_TELOMERES	2/77	51/10968	0.0497225	0.186869	0.144365	POLA1/RFC1	2
CARGO_TRAFFICKING_TO_THE_PERICILIARY_MEMBRANE	2/77	51/10968	0.0497225	0.186869	0.144365	CCT5/EXOC2	2

## Sheet: KICH
Supplementary Table S6. The enrichment analysis of NUP155 in the REACTOME pathway-KICH
Description	GeneRatio	BgRatio	pvalue	p.adjust	qvalue	geneID	Count
METABOLISM_OF_RNA	16/58	672/10968	2.34459e-07	8.22952e-05	7.62609e-05	WDR36/CNOT8/NSUN2/ETF1/GEMIN5/UTP15/SLU7/PPWD1/CWC27/PRMT5/HNRNPH1/RIOK2/PAIP1/DDX46/NDC1/RBM22	16
PROCESSING_OF_CAPPED_INTRON_CONTAINING_PRE_MRNA	7/58	242/10968	0.00026904	0.0317387	0.0294115	SLU7/PPWD1/CWC27/HNRNPH1/DDX46/NDC1/RBM22	7
ANTIGEN_PRESENTATION_FOLDING_ASSEMBLY_AND_PEPTIDE_LOADING_OF_CLASS_I_MHC	3/58	25/10968	0.000297175	0.0317387	0.0294115	CANX/SEC24A/ERAP1	3
HDR_THROUGH_HOMOLOGOUS_RECOMBINATION_HRR	4/58	67/10968	0.000421091	0.0317387	0.0294115	RFC1/RAD17/RAD1/RAD50	4
MRNA_SPLICING	6/58	188/10968	0.000452118	0.0317387	0.0294115	SLU7/PPWD1/CWC27/HNRNPH1/DDX46/RBM22	6
HDR_THROUGH_SINGLE_STRAND_ANNEALING_SSA	3/58	37/10968	0.000959758	0.0561458	0.052029	RAD17/RAD1/RAD50	3
HOMOLOGOUS_DNA_PAIRING_AND_STRAND_EXCHANGE	3/58	42/10968	0.00139172	0.0594667	0.0551064	RAD17/RAD1/RAD50	3
REGULATION_OF_TP53_ACTIVITY_THROUGH_PHOSPHORYLATION	4/58	92/10968	0.00139178	0.0594667	0.0551064	RAD17/PRKAA1/RAD1/RAD50	4
REGULATION_OF_TP53_ACTIVITY	5/58	160/10968	0.00152479	0.0594667	0.0551064	RAD17/PRKAA1/PRMT5/RAD1/RAD50	5
SNRNP_ASSEMBLY	3/58	54/10968	0.00287509	0.0915461	0.0848335	GEMIN5/PRMT5/NDC1	3
TRANSCRIPTIONAL_REGULATION_BY_TP53	7/58	363/10968	0.00288707	0.0915461	0.0848335	CNOT8/RAD17/PRKAA1/PRMT5/RAD1/RAD50/CCNT1	7
CELL_CYCLE	10/58	693/10968	0.00312978	0.0915461	0.0848335	FBXW11/NIPBL/CDC23/RFC1/RAD17/KIF2A/RAD1/TMPO/RAD50/NDC1	10
CLASS_I_MHC_MEDIATED_ANTIGEN_PROCESSING_PRESENTATION	7/58	377/10968	0.00356132	0.0961555	0.089105	FBXW11/CDC23/PJA2/CANX/SEC24A/UBE2D2/ERAP1	7
MHC_CLASS_II_ANTIGEN_PRESENTATION	4/58	126/10968	0.00436543	0.109448	0.101422	CANX/SEC24A/KIF2A/DCTN4	4
HOMOLOGY_DIRECTED_REPAIR	4/58	138/10968	0.00601983	0.140864	0.130535	RFC1/RAD17/RAD1/RAD50	4
DEADENYLATION_OF_MRNA	2/58	25/10968	0.00762571	0.167289	0.155023	CNOT8/PAIP1	2
SYNTHESIS_OF_ACTIVE_UBIQUITIN_ROLES_OF_E1_AND_E2_ENZYMES	2/58	30/10968	0.010872	0.224475	0.208016	UBE2D2/OTULIN	2
DNA_DOUBLE_STRAND_BREAK_REPAIR	4/58	167/10968	0.0116227	0.226642	0.210024	RFC1/RAD17/RAD1/RAD50	4
G2_M_DNA_DAMAGE_CHECKPOINT	3/58	95/10968	0.0137755	0.238837	0.221325	RAD17/RAD1/RAD50	3
MITOCHONDRIAL_TRANSLATION	3/58	96/10968	0.0141673	0.238837	0.221325	MRPS27/MRPS30/GFM2	3
PROCESSING_OF_DNA_DOUBLE_STRAND_BREAK_ENDS	3/58	98/10968	0.0149699	0.238837	0.221325	RAD17/RAD1/RAD50	3
PROTEIN_FOLDING	3/58	98/10968	0.0149699	0.238837	0.221325	CCT5/HDAC3/TBCA	3
ACTIVATION_OF_ATR_IN_RESPONSE_TO_REPLICATION_STRESS	2/58	37/10968	0.0162572	0.248099	0.229907	RAD17/RAD1	2
ASSOCIATION_OF_TRIC_CCT_WITH_TARGET_PROTEINS_DURING_BIOSYNTHESIS	2/58	39/10968	0.0179666	0.262761	0.243495	CCT5/HDAC3	2
CELL_CYCLE_CHECKPOINTS	5/58	292/10968	0.018762	0.263419	0.244104	CDC23/RAD17/KIF2A/RAD1/RAD50	5
TRANSLATION	5/58	295/10968	0.019519	0.263506	0.244185	ETF1/MRPS27/MRPS30/GFM2/SRP72	5
RNA_POLYMERASE_II_TRANSCRIPTION	13/58	1374/10968	0.0249438	0.32427	0.300493	CNOT8/ICE1/CDC23/RAD17/SLU7/AFF4/PRKAA1/PRMT5/RAD1/TEAD1/HDAC3/RAD50/CCNT1	13
MATURATION_OF_SARS_COV_1_SPIKE_PROTEIN	1/58	5/10968	0.0261671	0.328023	0.303971	CANX	1
CELL_CYCLE_MITOTIC	7/58	561/10968	0.0276796	0.329307	0.305161	FBXW11/NIPBL/CDC23/RFC1/KIF2A/TMPO/NDC1	7
ADAPTIVE_IMMUNE_SYSTEM	9/58	825/10968	0.0281459	0.329307	0.305161	FBXW11/CDC23/PJA2/CANX/SEC24A/UBE2D2/KIF2A/ERAP1/DCTN4	9
SENSING_OF_DNA_DOUBLE_STRAND_BREAKS	1/58	6/10968	0.0313192	0.336632	0.311949	RAD50	1
P75NTR_NEGATIVELY_REGULATES_CELL_CYCLE_VIA_SC1	1/58	6/10968	0.0313192	0.336632	0.311949	HDAC3	1
NUCLEAR_ENVELOPE_BREAKDOWN	2/58	53/10968	0.0318782	0.336632	0.311949	TMPO/NDC1	2
GOLGI_TO_ER_RETROGRADE_TRANSPORT	3/58	134/10968	0.0337949	0.336632	0.311949	TMED7/KIF2A/DCTN4	3
DEADENYLATION_DEPENDENT_MRNA_DECAY	2/58	56/10968	0.0352702	0.336632	0.311949	CNOT8/PAIP1	2
MITOTIC_METAPHASE_AND_ANAPHASE	4/58	236/10968	0.0358879	0.336632	0.311949	CDC23/KIF2A/TMPO/NDC1	4
LOSS_OF_MECP2_BINDING_ABILITY_TO_THE_NCOR_SMRT_COMPLEX	1/58	7/10968	0.0364445	0.336632	0.311949	HDAC3	1
ZINC_EFFLUX_AND_COMPARTMENTALIZATION_BY_THE_SLC30_FAMILY	1/58	7/10968	0.0364445	0.336632	0.311949	SLC30A5	1
FORMATION_OF_RNA_POL_II_ELONGATION_COMPLEX	2/58	58/10968	0.0376061	0.338454	0.313638	AFF4/CCNT1	2
RRNA_MODIFICATION_IN_THE_NUCLEUS_AND_CYTOSOL	2/58	60/10968	0.0399998	0.350998	0.325262	WDR36/UTP15	2
RUNX3_REGULATES_YAP1_MEDIATED_TRANSCRIPTION	1/58	8/10968	0.0415431	0.35565	0.329572	TEAD1	1
ER_TO_GOLGI_ANTEROGRADE_TRANSPORT	3/58	155/10968	0.0485803	0.394196	0.365292	SEC24A/TMED7/DCTN4	3

## Sheet: TGCT
Supplementary Table S6. The enrichment analysis of NUP155 in the REACTOME pathway-TGCT
Description	GeneRatio	BgRatio	pvalue	p.adjust	qvalue	geneID	Count
METABOLISM_OF_RNA	28/68	672/10968	6.19371e-17	2.00057e-14	1.21918e-14	DHX9/PHAX/NSUN2/NUP153/ETF1/NCL/PSME3/XRN2/PSME4/PSMD1/DDX46/UTP18/NDC1/UTP20/HEATR1/PTBP1/HNRNPK/DHX37/SF3A1/CSTF2/WDR43/NOL11/XPO1/SMG8/DDX21/PRPF40A/TNPO1/TEX10	28
M_PHASE	14/68	417/10968	2.00038e-07	2.35079e-05	1.43261e-05	NUP153/CEP76/PSME3/PSME4/ANAPC1/PSMD1/INCENP/NDC1/SMC2/KPNB1/NCAPG2/HAUS6/XPO1/TNPO1	14
CELL_CYCLE_MITOTIC	16/68	561/10968	2.18339e-07	2.35079e-05	1.43261e-05	NUP153/PRIM1/MCM4/CEP76/PSME3/PSME4/ANAPC1/PSMD1/INCENP/NDC1/SMC2/KPNB1/NCAPG2/HAUS6/XPO1/TNPO1	16
RRNA_PROCESSING	10/68	205/10968	4.72734e-07	3.81732e-05	2.32635e-05	NCL/XRN2/UTP18/UTP20/HEATR1/DHX37/WDR43/NOL11/DDX21/TEX10	10
CELL_CYCLE	17/68	693/10968	7.18473e-07	4.64134e-05	2.82851e-05	CLSPN/NUP153/PRIM1/MCM4/CEP76/PSME3/PSME4/ANAPC1/PSMD1/INCENP/NDC1/SMC2/KPNB1/NCAPG2/HAUS6/XPO1/TNPO1	17
RRNA_MODIFICATION_IN_THE_NUCLEUS_AND_CYTOSOL	6/68	60/10968	1.7459e-06	9.39874e-05	5.72776e-05	UTP18/UTP20/HEATR1/DHX37/WDR43/NOL11	6
MITOTIC_METAPHASE_AND_ANAPHASE	9/68	236/10968	1.38557e-05	0.000607663	0.000370321	PSME3/PSME4/ANAPC1/PSMD1/INCENP/NDC1/KPNB1/XPO1/TNPO1	9
HOST_INTERACTIONS_OF_HIV_FACTORS	7/68	131/10968	1.56202e-05	0.000607663	0.000370321	NUP153/PSME3/PSME4/PSMD1/NDC1/KPNB1/XPO1	7
PROCESSING_OF_CAPPED_INTRON_CONTAINING_PRE_MRNA	9/68	242/10968	1.69318e-05	0.000607663	0.000370321	DHX9/NUP153/DDX46/NDC1/PTBP1/HNRNPK/SF3A1/CSTF2/PRPF40A	9
INTERACTIONS_OF_REV_WITH_HOST_CELLULAR_PROTEINS	4/68	37/10968	7.64992e-05	0.00247092	0.00150583	NUP153/NDC1/KPNB1/XPO1	4
HIV_INFECTION	8/68	231/10968	8.53601e-05	0.00250648	0.0015275	NUP153/PSME3/PSME4/PSMD1/NDC1/KPNB1/XPO1/XRCC5	8
DNA_REPLICATION	6/68	128/10968	0.000136023	0.00366128	0.00223125	PRIM1/MCM4/PSME3/PSME4/ANAPC1/PSMD1	6
MRNA_SPLICING	7/68	188/10968	0.000155899	0.00387349	0.00236057	DHX9/DDX46/PTBP1/HNRNPK/SF3A1/CSTF2/PRPF40A	7
DNA_REPLICATION_PRE_INITIATION	5/68	85/10968	0.000176407	0.00406996	0.00248031	PRIM1/MCM4/PSME3/PSME4/PSMD1	5
REGULATION_OF_MRNA_STABILITY_BY_PROTEINS_THAT_BIND_AU_RICH_ELEMENTS	5/68	87/10968	0.000196828	0.00423837	0.00258294	PSME3/PSME4/PSMD1/XPO1/TNPO1	5
SWITCHING_OF_ORIGINS_TO_A_POST_REPLICATIVE_STATE	5/68	91/10968	0.00024304	0.00490636	0.00299003	MCM4/PSME3/PSME4/ANAPC1/PSMD1	5
CELL_CYCLE_CHECKPOINTS	8/68	292/10968	0.000423652	0.00804939	0.00490544	CLSPN/MCM4/PSME3/PSME4/ANAPC1/PSMD1/INCENP/XPO1	8
S_PHASE	6/68	162/10968	0.000486354	0.00872736	0.00531861	PRIM1/MCM4/PSME3/PSME4/ANAPC1/PSMD1	6
POSTMITOTIC_NUCLEAR_PORE_COMPLEX_NPC_REFORMATION	3/68	27/10968	0.000599333	0.00987281	0.00601667	NDC1/KPNB1/TNPO1	3
CYTOSOLIC_SENSORS_OF_PATHOGEN_ASSOCIATED_DNA	4/68	63/10968	0.00061132	0.00987281	0.00601667	DHX9/PRKDC/POLR3B/XRCC5	4
ASSEMBLY_OF_THE_PRE_REPLICATIVE_COMPLEX	4/68	68/10968	0.000816603	0.0125601	0.00765438	MCM4/PSME3/PSME4/PSMD1	4
ORC1_REMOVAL_FROM_CHROMATIN	4/68	71/10968	0.000960809	0.0141064	0.00859671	MCM4/PSME3/PSME4/PSMD1	4
POLB_DEPENDENT_LONG_PATCH_BASE_EXCISION_REPAIR	2/68	8/10968	0.00103529	0.0142204	0.00866615	PARP1/PARG	2
EXPORT_OF_VIRAL_RIBONUCLEOPROTEINS_FROM_NUCLEUS	3/68	33/10968	0.00108862	0.0142204	0.00866615	NUP153/NDC1/XPO1	3
APC_C_CDH1_MEDIATED_DEGRADATION_OF_CDC20_AND_OTHER_APC_C_CDH1_TARGETED_PROTEINS_IN_LATE_MITOSIS_EARLY_G1	4/68	74/10968	0.00112208	0.0142204	0.00866615	PSME3/PSME4/ANAPC1/PSMD1	4
SEPARATION_OF_SISTER_CHROMATIDS	6/68	191/10968	0.00115196	0.0142204	0.00866615	PSME3/PSME4/ANAPC1/PSMD1/INCENP/XPO1	6
NUCLEAR_IMPORT_OF_REV_PROTEIN	3/68	34/10968	0.0011887	0.0142204	0.00866615	NUP153/NDC1/KPNB1	3
MITOTIC_G2_G2_M_PHASES	6/68	200/10968	0.00145918	0.0168327	0.0102581	CEP76/PSME3/PSME4/PSMD1/HAUS6/XPO1	6
FOLDING_OF_ACTIN_BY_CCT_TRIC	2/68	10/10968	0.00165057	0.0183839	0.0112035	CCT5/CCT4	2
ASSOCIATION_OF_TRIC_CCT_WITH_TARGET_PROTEINS_DURING_BIOSYNTHESIS	3/68	39/10968	0.00177573	0.0191187	0.0116513	CCT5/XRN2/CCT4	3
NS1_MEDIATED_EFFECTS_ON_HOST_PATHWAYS	3/68	41/10968	0.00205304	0.0213914	0.0130363	NUP153/NDC1/KPNB1	3
APC_C_MEDIATED_DEGRADATION_OF_CELL_CYCLE_PROTEINS	4/68	88/10968	0.00213118	0.0215116	0.0131096	PSME3/PSME4/ANAPC1/PSMD1	4
ORGANELLE_BIOGENESIS_AND_MAINTENANCE	7/68	296/10968	0.00230302	0.0225417	0.0137373	CCT5/CEP76/HCFC1/CCT4/TFAM/HAUS6/TNPO1	7
MAPK6_MAPK4_SIGNALING	4/68	93/10968	0.00260739	0.0247702	0.0150954	PSME3/PSME4/PSMD1/XPO1	4
IRF3_MEDIATED_INDUCTION_OF_TYPE_I_IFN	2/68	13/10968	0.00282682	0.0249648	0.015214	PRKDC/XRCC5	2
INFLUENZA_INFECTION	5/68	157/10968	0.0028453	0.0249648	0.015214	NUP153/PARP1/NDC1/KPNB1/XPO1	5
SUMOYLATION_OF_DNA_REPLICATION_PROTEINS	3/68	46/10968	0.00285974	0.0249648	0.015214	NUP153/INCENP/NDC1	3
SUMOYLATION_OF_RNA_BINDING_PROTEINS	3/68	47/10968	0.00304128	0.0258509	0.015754	NUP153/NDC1/HNRNPK	3
CROSS_PRESENTATION_OF_SOLUBLE_EXOGENOUS_ANTIGENS_ENDOSOMES	3/68	50/10968	0.00362787	0.0292222	0.0178085	PSME3/PSME4/PSMD1	3
UCH_PROTEINASES	4/68	102/10968	0.0036403	0.0292222	0.0178085	PSME3/PSME4/PSMD1/HCFC1	4
DNA_DOUBLE_STRAND_BREAK_REPAIR	5/68	167/10968	0.00370932	0.0292222	0.0178085	CLSPN/PRKDC/PARP1/XRCC5/RIF1	5
G2_M_CHECKPOINTS	5/68	168/10968	0.00380502	0.0292624	0.017833	CLSPN/MCM4/PSME3/PSME4/PSMD1	5
STING_MEDIATED_INDUCTION_OF_HOST_IMMUNE_RESPONSES	2/68	16/10968	0.00429709	0.0319387	0.019464	PRKDC/XRCC5	2
DNA_REPAIR	7/68	332/10968	0.00435079	0.0319387	0.019464	CLSPN/PRKDC/PARP1/MSH6/PARG/XRCC5/RIF1	7
SNRNP_ASSEMBLY	3/68	54/10968	0.00451091	0.0319649	0.01948	PHAX/NUP153/NDC1	3
DISORDERS_OF_TRANSMEMBRANE_TRANSPORTERS	5/68	176/10968	0.00463554	0.0319649	0.01948	NUP153/PSME3/PSME4/PSMD1/NDC1	5
AUF1_HNRNP_D0_BINDS_AND_DESTABILIZES_MRNA	3/68	55/10968	0.0047502	0.0319649	0.01948	PSME3/PSME4/PSMD1	3
DEGRADATION_OF_AXIN	3/68	55/10968	0.0047502	0.0319649	0.01948	PSME3/PSME4/PSMD1	3
TRNA_PROCESSING	4/68	111/10968	0.00492154	0.0321575	0.0195974	NSUN2/NUP153/NDC1/CSTF2	4
APOPTOSIS	5/68	179/10968	0.00497794	0.0321575	0.0195974	CLSPN/PSME3/PSME4/PSMD1/KPNB1	5
STABILIZATION_OF_P53	3/68	57/10968	0.00525149	0.0326198	0.0198791	PSME3/PSME4/PSMD1	3
DEGRADATION_OF_DVL	3/68	57/10968	0.00525149	0.0326198	0.0198791	PSME3/PSME4/PSMD1	3
TRNA_PROCESSING_IN_THE_NUCLEUS	3/68	59/10968	0.00578351	0.034594	0.0210822	NUP153/NDC1/CSTF2	3
METABOLISM_OF_POLYAMINES	3/68	59/10968	0.00578351	0.034594	0.0210822	PSME3/PSME4/PSMD1	3
SUMOYLATION	5/68	187/10968	0.00597855	0.0349601	0.0213053	NUP153/PARP1/INCENP/NDC1/HNRNPK	5
DEGRADATION_OF_GLI1_BY_THE_PROTEASOME	3/68	60/10968	0.0060612	0.0349601	0.0213053	PSME3/PSME4/PSMD1	3
DEFECTIVE_CFTR_CAUSES_CYSTIC_FIBROSIS	3/68	61/10968	0.00634675	0.0359649	0.0219177	PSME3/PSME4/PSMD1	3
TRANSCRIPTIONAL_REGULATION_BY_RUNX2	4/68	120/10968	0.00647603	0.0360648	0.0219785	PSME3/PSME4/PSMD1/RBM14	4
DECTIN_1_MEDIATED_NONCANONICAL_NF_KB_SIGNALING	3/68	62/10968	0.00664022	0.0363524	0.0221538	PSME3/PSME4/PSMD1	3
ASYMMETRIC_LOCALIZATION_OF_PCP_PROTEINS	3/68	64/10968	0.00725113	0.0384464	0.02343	PSME3/PSME4/PSMD1	3
CYTOPROTECTION_BY_HMOX1	4/68	124/10968	0.00726078	0.0384464	0.02343	LRPPRC/PSME3/PSME4/PSMD1	4
REGULATION_OF_HMOX1_EXPRESSION_AND_ACTIVITY	3/68	65/10968	0.00756868	0.0388045	0.0236482	PSME3/PSME4/PSMD1	3
HEDGEHOG_LIGAND_BIOGENESIS	3/68	65/10968	0.00756868	0.0388045	0.0236482	PSME3/PSME4/PSMD1	3
CILIUM_ASSEMBLY	5/68	202/10968	0.00822399	0.0411623	0.0250851	CCT5/CEP76/CCT4/HAUS6/TNPO1	5
MITOTIC_PROMETAPHASE	5/68	203/10968	0.00839191	0.0411623	0.0250851	CEP76/INCENP/SMC2/HAUS6/XPO1	5
G1_S_DNA_DAMAGE_CHECKPOINTS	3/68	68/10968	0.00857029	0.0411623	0.0250851	PSME3/PSME4/PSMD1	3
REGULATION_OF_RAS_BY_GAPS	3/68	68/10968	0.00857029	0.0411623	0.0250851	PSME3/PSME4/PSMD1	3
BBSOME_MEDIATED_CARGO_TARGETING_TO_CILIUM	2/68	23/10968	0.00881014	0.0411623	0.0250851	CCT5/CCT4	2
NONHOMOLOGOUS_END_JOINING_NHEJ	3/68	69/10968	0.00892063	0.0411623	0.0250851	PRKDC/XRCC5/RIF1	3
REGULATION_OF_PTEN_STABILITY_AND_ACTIVITY	3/68	69/10968	0.00892063	0.0411623	0.0250851	PSME3/PSME4/PSMD1	3
PROGRAMMED_CELL_DEATH	5/68	208/10968	0.00926742	0.0421603	0.0256932	CLSPN/PSME3/PSME4/PSMD1/KPNB1	5
RESOLUTION_OF_AP_SITES_VIA_THE_MULTIPLE_NUCLEOTIDE_PATCH_REPLACEMENT_PATHWAY	2/68	25/10968	0.0103639	0.0460405	0.0280579	PARP1/PARG	2
REGULATION_OF_RUNX2_EXPRESSION_AND_ACTIVITY	3/68	73/10968	0.0104054	0.0460405	0.0280579	PSME3/PSME4/PSMD1	3
FORMATION_OF_TUBULIN_FOLDING_INTERMEDIATES_BY_CCT_TRIC	2/68	26/10968	0.011183	0.0482279	0.029391	CCT5/CCT4	2
CELLULAR_RESPONSE_TO_HYPOXIA	3/68	75/10968	0.0111984	0.0482279	0.029391	PSME3/PSME4/PSMD1	3
NUCLEAR_ENVELOPE_NE_REASSEMBLY	3/68	76/10968	0.0116077	0.0491677	0.0299637	NDC1/KPNB1/TNPO1	3
MITOTIC_PROPHASE	4/68	143/10968	0.0118452	0.0491677	0.0299637	NUP153/NDC1/SMC2/NCAPG2	4
SUMOYLATION_OF_DNA_DAMAGE_RESPONSE_AND_REPAIR_PROTEINS	3/68	77/10968	0.0120255	0.0491677	0.0299637	NUP153/PARP1/NDC1	3
ABC_TRANSPORTER_DISORDERS	3/68	77/10968	0.0120255	0.0491677	0.0299637	PSME3/PSME4/PSMD1	3
THE_ROLE_OF_GTSE1_IN_G2_M_PROGRESSION_AFTER_G2_CHECKPOINT	3/68	79/10968	0.0128869	0.0514553	0.0313578	PSME3/PSME4/PSMD1	3
RNA_POLYMERASE_III_TRANSCRIPTION_INITIATION_FROM_TYPE_1_PROMOTER	2/68	28/10968	0.0129036	0.0514553	0.0313578	GTF3C4/POLR3B	2
HIV_LIFE_CYCLE	4/68	149/10968	0.0136061	0.052949	0.0322681	NUP153/NDC1/XPO1/XRCC5	4
MITOTIC_G1_PHASE_AND_G1_S_TRANSITION	4/68	149/10968	0.0136061	0.052949	0.0322681	PRIM1/MCM4/PSME3/PSMD1	4
DOWNSTREAM_SIGNALING_EVENTS_OF_B_CELL_RECEPTOR_BCR	3/68	81/10968	0.0137829	0.0529985	0.0322983	PSME3/PSME4/PSMD1	3
ANTIVIRAL_MECHANISM_BY_IFN_STIMULATED_GENES	3/68	82/10968	0.0142439	0.0534974	0.0326023	NUP153/NDC1/KPNB1	3
REGULATION_OF_HSF1_MEDIATED_HEAT_SHOCK_RESPONSE	3/68	82/10968	0.0142439	0.0534974	0.0326023	HSPA14/NUP153/NDC1	3
DEGRADATION_OF_BETA_CATENIN_BY_THE_DESTRUCTION_COMPLEX	3/68	85/10968	0.0156791	0.0582111	0.0354749	PSME3/PSME4/PSMD1	3
HEDGEHOG_ON_STATE	3/68	86/10968	0.0161751	0.0593698	0.036181	PSME3/PSME4/PSMD1	3
DNA_STRAND_ELONGATION	2/68	32/10968	0.0166649	0.0598086	0.0364484	PRIM1/MCM4	2
REGULATION_OF_GLUCOKINASE_BY_GLUCOKINASE_REGULATORY_PROTEIN	2/68	32/10968	0.0166649	0.0598086	0.0364484	NUP153/NDC1	2
CELLULAR_RESPONSE_TO_CHEMICAL_STRESS	4/68	160/10968	0.0172504	0.0612293	0.0373143	LRPPRC/PSME3/PSME4/PSMD1	4
ACTIVATION_OF_THE_PRE_REPLICATIVE_COMPLEX	2/68	33/10968	0.0176698	0.0613695	0.0373997	PRIM1/MCM4	2
COOPERATION_OF_PREFOLDIN_AND_TRIC_CCT_IN_ACTIN_AND_TUBULIN_FOLDING	2/68	33/10968	0.0176698	0.0613695	0.0373997	CCT5/CCT4	2
PCP_CE_PATHWAY	3/68	92/10968	0.0193353	0.0664393	0.0404893	PSME3/PSME4/PSMD1	3
SUMOYLATION_OF_SUMOYLATION_PROTEINS	2/68	35/10968	0.0197548	0.0671663	0.0409324	NUP153/NDC1	2
TRANSPORT_OF_THE_SLBP_DEPENDANT_MATURE_MRNA	2/68	36/10968	0.0208341	0.0693756	0.0422787	NUP153/NDC1	2
NUCLEAR_PORE_COMPLEX_NPC_DISASSEMBLY	2/68	36/10968	0.0208341	0.0693756	0.0422787	NUP153/NDC1	2
REGULATION_OF_EXPRESSION_OF_SLITS_AND_ROBOS	4/68	172/10968	0.021865	0.0708586	0.0431825	ETF1/PSME3/PSME4/PSMD1	4
INTERACTIONS_OF_VPR_WITH_HOST_CELLULAR_PROTEINS	2/68	37/10968	0.0219376	0.0708586	0.0431825	NUP153/NDC1	2
ACTIVATION_OF_ATR_IN_RESPONSE_TO_REPLICATION_STRESS	2/68	37/10968	0.0219376	0.0708586	0.0431825	CLSPN/MCM4	2
PROTEIN_FOLDING	3/68	98/10968	0.0228137	0.0723298	0.0440791	CCT5/XRN2/CCT4	3
COOPERATION_OF_PDCL_PHLP1_AND_TRIC_CCT_IN_G_PROTEIN_BETA_FOLDING	2/68	38/10968	0.0230649	0.0723298	0.0440791	CCT5/CCT4	2
RESOLUTION_OF_ABASIC_SITES_AP_SITES	2/68	38/10968	0.0230649	0.0723298	0.0440791	PARP1/PARG	2
CLEC7A_DECTIN_1_SIGNALING	3/68	100/10968	0.024044	0.0744787	0.0453887	PSME3/PSME4/PSMD1	3
SUMOYLATION_OF_UBIQUITINYLATION_PROTEINS	2/68	39/10968	0.0242157	0.0744787	0.0453887	NUP153/NDC1	2
CELLULAR_RESPONSE_TO_HEAT_STRESS	3/68	101/10968	0.0246725	0.0744787	0.0453887	HSPA14/NUP153/NDC1	3
TNFR2_NON_CANONICAL_NF_KB_PATHWAY	3/68	101/10968	0.0246725	0.0744787	0.0453887	PSME3/PSME4/PSMD1	3
INTERLEUKIN_1_SIGNALING	3/68	102/10968	0.0253099	0.0756952	0.0461301	PSME3/PSME4/PSMD1	3
ABC_FAMILY_PROTEINS_MEDIATED_TRANSPORT	3/68	103/10968	0.0259561	0.0769157	0.0468738	PSME3/PSME4/PSMD1	3
RNA_POLYMERASE_III_TRANSCRIPTION	2/68	41/10968	0.0265864	0.0780672	0.0475756	GTF3C4/POLR3B	2
ANTIGEN_PROCESSING_CROSS_PRESENTATION	3/68	106/10968	0.0279478	0.0813254	0.0495612	PSME3/PSME4/PSMD1	3
TRANSPORT_OF_MATURE_MRNAS_DERIVED_FROM_INTRONLESS_TRANSCRIPTS	2/68	43/10968	0.0290471	0.0837696	0.0510508	NUP153/NDC1	2
CELLULAR_RESPONSES_TO_EXTERNAL_STIMULI	9/68	706/10968	0.0294624	0.0842154	0.0513224	HSPA14/NUP153/LRPPRC/PSME3/PSME4/ANAPC1/PSMD1/NDC1/XPO1	9
VIRAL_MESSENGER_RNA_SYNTHESIS	2/68	44/10968	0.0303104	0.0858794	0.0523365	NUP153/NDC1	2
DISEASES_OF_MISMATCH_REPAIR_MMR	1/68	5/10968	0.0306228	0.0860101	0.0524161	MSH6	1
MITOTIC_SPINDLE_CHECKPOINT	3/68	111/10968	0.0314438	0.0875547	0.0533574	ANAPC1/INCENP/XPO1	3
HEDGEHOG_OFF_STATE	3/68	113/10968	0.0329038	0.0908369	0.0553576	PSME3/PSME4/PSMD1	3
HCMV_LATE_EVENTS	3/68	116/10968	0.0351593	0.0962412	0.0586512	NUP153/NDC1/HNRNPK	3
DEUBIQUITINATION	5/68	298/10968	0.0371856	0.100932	0.0615101	CLSPN/PSME3/PSME4/PSMD1/HCFC1	5
CARGO_TRAFFICKING_TO_THE_PERICILIARY_MEMBRANE	2/68	51/10968	0.0397406	0.106969	0.0651886	CCT5/CCT4	2
APOPTOTIC_EXECUTION_PHASE	2/68	52/10968	0.0411681	0.109242	0.0665743	CLSPN/KPNB1	2
TCR_SIGNALING	3/68	124/10968	0.041556	0.109242	0.0665743	PSME3/PSME4/PSMD1	3
ANTIGEN_PROCESSING_UBIQUITINATION_PROTEASOME_DEGRADATION	5/68	308/10968	0.0419015	0.109242	0.0665743	PSME3/PSME4/ANAPC1/PSMD1/RNF34	5
2_LTR_CIRCLE_FORMATION	1/68	7/10968	0.0426115	0.109242	0.0665743	XRCC5	1
DEX_H_BOX_HELICASES_ACTIVATE_TYPE_I_IFN_AND_INFLAMMATORY_CYTOKINES_PRODUCTION	1/68	7/10968	0.0426115	0.109242	0.0665743	DHX9	1
NUCLEAR_ENVELOPE_BREAKDOWN	2/68	53/10968	0.0426147	0.109242	0.0665743	NUP153/NDC1	2
NEGATIVE_REGULATION_OF_NOTCH4_SIGNALING	2/68	54/10968	0.0440802	0.11211	0.0683216	PSME3/PSMD1	2
REGULATION_OF_RUNX3_EXPRESSION_AND_ACTIVITY	2/68	55/10968	0.0455644	0.11321	0.0689922	PSME3/PSMD1	2
REGULATION_OF_CHOLESTEROL_BIOSYNTHESIS_BY_SREBP_SREBF	2/68	55/10968	0.0455644	0.11321	0.0689922	HMGCR/KPNB1	2
TRANSCRIPTIONAL_ACTIVATION_OF_MITOCHONDRIAL_BIOGENESIS	2/68	55/10968	0.0455644	0.11321	0.0689922	HCFC1/TFAM	2
SIGNALING_BY_ROBO_RECEPTORS	4/68	218/10968	0.04611	0.113691	0.0692854	ETF1/PSME3/PSME4/PSMD1	4
RUNX1_REGULATES_TRANSCRIPTION_OF_GENES_INVOLVED_IN_DIFFERENTIATION_OF_HSCS	3/68	130/10968	0.046713	0.114305	0.0696597	PSME3/PSME4/PSMD1	3
UB_SPECIFIC_PROCESSING_PROTEASES	4/68	221/10968	0.0480618	0.115309	0.0702711	CLSPN/PSME3/PSME4/PSMD1	4
DNA_REPLICATION_INITIATION	1/68	8/10968	0.048551	0.115309	0.0702711	PRIM1	1
COENZYME_A_BIOSYNTHESIS	1/68	8/10968	0.048551	0.115309	0.0702711	PANK3	1
HUR_ELAVL1_BINDS_AND_STABILIZES_MRNA	1/68	8/10968	0.048551	0.115309	0.0702711	XPO1	1

## Sheet: KIRC
Supplementary Table S6. The enrichment analysis of NUP155 in the REACTOME pathway-KIRC
Description	GeneRatio	BgRatio	pvalue	p.adjust	qvalue	geneID	Count
CELL_CYCLE	17/69	693/10968	8.98174e-07	0.000282027	0.000224071	POLA1/ANAPC1/TNPO1/NUP205/RAD1/SMC2/NUP98/ZW10/NUP133/ATRX/FBXW11/NIPBL/PDS5A/RSF1/PHF20/HAUS2/RANBP2	17
ANTIGEN_PROCESSING_UBIQUITINATION_PROTEASOME_DEGRADATION	11/69	308/10968	3.05874e-06	0.000434273	0.000345031	ANAPC1/ITCH/RNF111/UBR1/RLIM/HUWE1/FBXW11/UBE4A/TRIP12/PJA2/UBE3A	11
SUMOYLATION_OF_UBIQUITINYLATION_PROTEINS	5/69	39/10968	4.1491e-06	0.000434273	0.000345031	NUP205/NUP98/NUP133/RANBP2/PIAS1	5
CLASS_I_MHC_MEDIATED_ANTIGEN_PROCESSING_PRESENTATION	11/69	377/10968	2.07863e-05	0.00118124	0.000938497	ANAPC1/ITCH/RNF111/UBR1/RLIM/HUWE1/FBXW11/UBE4A/TRIP12/PJA2/UBE3A	11
SNRNP_ASSEMBLY	5/69	54/10968	2.11867e-05	0.00118124	0.000938497	NUP205/GEMIN5/NUP98/NUP133/RANBP2	5
POSTMITOTIC_NUCLEAR_PORE_COMPLEX_NPC_REFORMATION	4/69	27/10968	2.25715e-05	0.00118124	0.000938497	TNPO1/NUP205/NUP98/NUP133	4
CELL_CYCLE_MITOTIC	13/69	561/10968	3.92521e-05	0.00149633	0.00118884	POLA1/ANAPC1/TNPO1/NUP205/SMC2/NUP98/ZW10/NUP133/FBXW11/NIPBL/PDS5A/HAUS2/RANBP2	13
REGULATION_OF_GLUCOKINASE_BY_GLUCOKINASE_REGULATORY_PROTEIN	4/69	32/10968	4.5166e-05	0.00149633	0.00118884	NUP205/NUP98/NUP133/RANBP2	4
EXPORT_OF_VIRAL_RIBONUCLEOPROTEINS_FROM_NUCLEUS	4/69	33/10968	5.11529e-05	0.00149633	0.00118884	NUP205/NUP98/NUP133/RANBP2	4
M_PHASE	11/69	417/10968	5.2451e-05	0.00149633	0.00118884	ANAPC1/TNPO1/NUP205/SMC2/NUP98/ZW10/NUP133/NIPBL/PDS5A/HAUS2/RANBP2	11
NUCLEAR_IMPORT_OF_REV_PROTEIN	4/69	34/10968	5.76993e-05	0.00149633	0.00118884	NUP205/NUP98/NUP133/RANBP2	4
SUMOYLATION_OF_SUMOYLATION_PROTEINS	4/69	35/10968	6.48366e-05	0.00149633	0.00118884	NUP205/NUP98/NUP133/RANBP2	4
TRANSPORT_OF_THE_SLBP_DEPENDANT_MATURE_MRNA	4/69	36/10968	7.25965e-05	0.00149633	0.00118884	NUP205/NUP98/NUP133/RANBP2	4
NUCLEAR_PORE_COMPLEX_NPC_DISASSEMBLY	4/69	36/10968	7.25965e-05	0.00149633	0.00118884	NUP205/NUP98/NUP133/RANBP2	4
SUMOYLATION_OF_CHROMATIN_ORGANIZATION_PROTEINS	5/69	71/10968	8.03104e-05	0.00149633	0.00118884	NUP205/NUP98/NUP133/RANBP2/PIAS1	5
INTERACTIONS_OF_VPR_WITH_HOST_CELLULAR_PROTEINS	4/69	37/10968	8.10117e-05	0.00149633	0.00118884	NUP205/NUP98/NUP133/RANBP2	4
INTERACTIONS_OF_REV_WITH_HOST_CELLULAR_PROTEINS	4/69	37/10968	8.10117e-05	0.00149633	0.00118884	NUP205/NUP98/NUP133/RANBP2	4
MITOTIC_METAPHASE_AND_ANAPHASE	8/69	236/10968	0.000110071	0.00191366	0.00152041	ANAPC1/TNPO1/NUP205/NUP98/ZW10/NUP133/PDS5A/RANBP2	8
SUMOYLATION_OF_DNA_DAMAGE_RESPONSE_AND_REPAIR_PROTEINS	5/69	77/10968	0.000118373	0.00191366	0.00152041	NUP205/NUP98/NUP133/RANBP2/PIAS1	5
NS1_MEDIATED_EFFECTS_ON_HOST_PATHWAYS	4/69	41/10968	0.000121889	0.00191366	0.00152041	NUP205/NUP98/NUP133/RANBP2	4
TRANSPORT_OF_MATURE_MRNAS_DERIVED_FROM_INTRONLESS_TRANSCRIPTS	4/69	43/10968	0.000147138	0.00219921	0.00174727	NUP205/NUP98/NUP133/RANBP2	4
ANTIVIRAL_MECHANISM_BY_IFN_STIMULATED_GENES	5/69	82/10968	0.000159554	0.00219921	0.00174727	NUP205/NUP98/NUP133/ARIH1/RANBP2	5
VIRAL_MESSENGER_RNA_SYNTHESIS	4/69	44/10968	0.000161088	0.00219921	0.00174727	NUP205/NUP98/NUP133/RANBP2	4
SUMOYLATION_OF_DNA_REPLICATION_PROTEINS	4/69	46/10968	0.00019182	0.00250964	0.00199392	NUP205/NUP98/NUP133/RANBP2	4
SUMOYLATION_OF_RNA_BINDING_PROTEINS	4/69	47/10968	0.000208675	0.00262095	0.00208235	NUP205/NUP98/NUP133/RANBP2	4
MITOTIC_PROMETAPHASE	7/69	203/10968	0.000274031	0.00330946	0.00262937	SMC2/NUP98/ZW10/NUP133/PDS5A/HAUS2/RANBP2	7
NUCLEAR_ENVELOPE_BREAKDOWN	4/69	53/10968	0.000333007	0.00387274	0.0030769	NUP205/NUP98/NUP133/RANBP2	4
TRNA_PROCESSING_IN_THE_NUCLEUS	4/69	59/10968	0.000503119	0.00564212	0.00448268	NUP205/NUP98/NUP133/RANBP2	4
TRANSCRIPTIONAL_REGULATION_BY_SMALL_RNAS	5/69	107/10968	0.000550718	0.00596295	0.00473758	NUP205/IPO8/NUP98/NUP133/RANBP2	5
MITOTIC_SPINDLE_CHECKPOINT	5/69	111/10968	0.000651209	0.00681599	0.00541532	ANAPC1/NUP98/ZW10/NUP133/RANBP2	5
ZINC_EFFLUX_AND_COMPARTMENTALIZATION_BY_THE_SLC30_FAMILY	2/69	7/10968	0.000802614	0.00812971	0.00645907	SLC30A6/SLC30A5	2
GLYCOLYSIS	4/69	72/10968	0.00106965	0.0104959	0.00833902	NUP205/NUP98/NUP133/RANBP2	4
SUMOYLATION	6/69	187/10968	0.00111518	0.0106111	0.00843057	NUP205/NUP98/NUP133/SENP1/RANBP2/PIAS1	6
RESOLUTION_OF_SISTER_CHROMATID_COHESION	5/69	126/10968	0.00115406	0.0106581	0.00846788	NUP98/ZW10/NUP133/PDS5A/RANBP2	5
SEPARATION_OF_SISTER_CHROMATIDS	6/69	191/10968	0.00124371	0.0111578	0.00886492	ANAPC1/NUP98/ZW10/NUP133/PDS5A/RANBP2	6
NUCLEAR_ENVELOPE_NE_REASSEMBLY	4/69	76/10968	0.00130903	0.0114176	0.00907134	TNPO1/NUP205/NUP98/NUP133	4
INTERFERON_SIGNALING	6/69	203/10968	0.00169821	0.013968	0.0110976	NUP205/NUP98/NUP133/ARIH1/RANBP2/PIAS1	6
COHESIN_LOADING_ONTO_CHROMATIN	2/69	10/10968	0.00169901	0.013968	0.0110976	NIPBL/PDS5A	2
REGULATION_OF_HSF1_MEDIATED_HEAT_SHOCK_RESPONSE	4/69	82/10968	0.00173488	0.013968	0.0110976	NUP205/NUP98/NUP133/RANBP2	4
GENE_SILENCING_BY_RNA	5/69	140/10968	0.0018415	0.0144558	0.0114851	NUP205/IPO8/NUP98/NUP133/RANBP2	5
TRANSPORT_OF_MATURE_TRANSCRIPT_TO_CYTOPLASM	4/69	84/10968	0.00189594	0.0145201	0.0115363	NUP205/NUP98/NUP133/RANBP2	4
MITOTIC_PROPHASE	5/69	143/10968	0.0020211	0.0151101	0.012005	NUP205/SMC2/NUP98/NUP133/RANBP2	5
CELL_CYCLE_CHECKPOINTS	7/69	292/10968	0.00232078	0.0169471	0.0134645	ANAPC1/RAD1/NUP98/ZW10/NUP133/PHF20/RANBP2	7
GLUCOSE_METABOLISM	4/69	92/10968	0.00264422	0.0188701	0.0149924	NUP205/NUP98/NUP133/RANBP2	4
MITOTIC_TELOPHASE_CYTOKINESIS	2/69	13/10968	0.00290926	0.0201807	0.0160336	NIPBL/PDS5A	2
METABOLISM_OF_RNA	11/69	672/10968	0.00295641	0.0201807	0.0160336	TNPO1/NUP205/GEMIN5/AQR/CNOT1/NUP98/NUP133/TTC37/WDR3/NUDT21/RANBP2	11
SLC_TRANSPORTER_DISORDERS	4/69	99/10968	0.0034472	0.0230302	0.0182975	NUP205/NUP98/NUP133/RANBP2	4
CELLULAR_RESPONSE_TO_HEAT_STRESS	4/69	101/10968	0.00370398	0.0242302	0.0192509	NUP205/NUP98/NUP133/RANBP2	4
PROCESSING_OF_CAPPED_INTRON_CONTAINING_PRE_MRNA	6/69	242/10968	0.00407585	0.0261187	0.0207514	NUP205/AQR/NUP98/NUP133/NUDT21/RANBP2	6
ZINC_TRANSPORTERS	2/69	17/10968	0.00499087	0.0313426	0.0249018	SLC30A6/SLC30A5	2
TRNA_PROCESSING	4/69	111/10968	0.00518432	0.0319192	0.0253599	NUP205/NUP98/NUP133/RANBP2	4
HCMV_LATE_EVENTS	4/69	116/10968	0.00605477	0.0365615	0.0290482	NUP205/NUP98/NUP133/RANBP2	4
DOWNREGULATION_OF_SMAD2_3_SMAD4_TRANSCRIPTIONAL_ACTIVITY	2/69	23/10968	0.00906162	0.0536858	0.0426535	RNF111/USP9X	2
HOST_INTERACTIONS_OF_HIV_FACTORS	4/69	131/10968	0.00923669	0.0537097	0.0426724	NUP205/NUP98/NUP133/RANBP2	4
RNA_POLYMERASE_II_TRANSCRIPTION	16/69	1374/10968	0.00994878	0.0567985	0.0451265	ICE1/ANAPC1/CDK12/ITCH/MED14/MED13/RAD1/RNF111/CNOT1/AFF4/PRKAA1/INTS2/MED1/PHF20/NUDT21/USP9X	16
HCMV_EARLY_EVENTS	4/69	138/10968	0.0110354	0.0618769	0.0491613	NUP205/NUP98/NUP133/RANBP2	4
METAL_ION_SLC_TRANSPORTERS	2/69	26/10968	0.0115001	0.0627347	0.0498429	SLC30A6/SLC30A5	2
RHO_GTPASES_ACTIVATE_FORMINS	4/69	140/10968	0.0115879	0.0627347	0.0498429	NUP98/ZW10/NUP133/RANBP2	4
INSULIN_PROCESSING	2/69	27/10968	0.0123701	0.0658342	0.0523054	SLC30A6/SLC30A5	2
ADAPTIVE_IMMUNE_SYSTEM	11/69	825/10968	0.0133461	0.0698443	0.0554915	ANAPC1/ITCH/RNF111/UBR1/RLIM/HUWE1/FBXW11/UBE4A/TRIP12/PJA2/UBE3A	11
HIV_LIFE_CYCLE	4/69	149/10968	0.0142946	0.0735818	0.0584609	NUP205/NUP98/NUP133/RANBP2	4
POST_TRANSLATIONAL_PROTEIN_MODIFICATION	16/69	1435/10968	0.0147734	0.0748202	0.0594448	CAND1/COG5/NUP205/PRKDC/ASXL2/USP34/NUP98/NUP133/SENP1/SEC23IP/USP37/PUM2/FBXW11/RANBP2/PIAS1/USP9X	16
TRANSCRIPTIONAL_REGULATION_OF_WHITE_ADIPOCYTE_DIFFERENTIATION	3/69	84/10968	0.0157964	0.078731	0.062552	MED14/MED13/MED1	3
INFLUENZA_INFECTION	4/69	157/10968	0.0170124	0.0834669	0.0663146	NUP205/NUP98/NUP133/RANBP2	4
HCMV_INFECTION	4/69	162/10968	0.0188649	0.0911319	0.0724045	NUP205/NUP98/NUP133/RANBP2	4
DISEASES_OF_MITOTIC_CELL_CYCLE	2/69	38/10968	0.0237022	0.112765	0.0895919	ANAPC1/ATRX	2
DISORDERS_OF_TRANSMEMBRANE_TRANSPORTERS	4/69	176/10968	0.024702	0.115768	0.0919775	NUP205/NUP98/NUP133/RANBP2	4
SIGNALING_BY_TGFB_FAMILY_MEMBERS	3/69	102/10968	0.0262859	0.121379	0.0964359	RNF111/SMAD5/USP9X	3
FORMATION_OF_INCISION_COMPLEX_IN_GG_NER	2/69	43/10968	0.0298408	0.135797	0.107891	RNF111/PIAS1	2
TRANSCRIPTIONAL_ACTIVITY_OF_SMAD2_SMAD3_SMAD4_HETEROTRIMER	2/69	44/10968	0.0311368	0.139671	0.110969	RNF111/USP9X	2
NUCLEOTIDE_EXCISION_REPAIR	3/69	110/10968	0.0318954	0.141059	0.112071	RNF111/AQR/PIAS1	3
SUMO_IS_PROTEOLYTICALLY_PROCESSED	1/69	6/10968	0.0371658	0.162084	0.128776	SENP1	1
REGULATION_OF_LIPID_METABOLISM_BY_PPARALPHA	3/69	120/10968	0.0397191	0.170847	0.135738	MED14/MED13/MED1	3
RAS_SIGNALING_DOWNSTREAM_OF_NF1_LOSS_OF_FUNCTION_VARIANTS	1/69	7/10968	0.0432263	0.18342	0.145728	NF1	1
DEADENYLATION_DEPENDENT_MRNA_DECAY	2/69	56/10968	0.0483165	0.200835	0.159564	CNOT1/TTC37	2
DNA_REPLICATION_INITIATION	1/69	8/10968	0.0492493	0.200835	0.159564	POLA1	1
COENZYME_A_BIOSYNTHESIS	1/69	8/10968	0.0492493	0.200835	0.159564	PANK3	1

## Sheet: THCA
Supplementary Table S6. The enrichment analysis of NUP155 in the REACTOME pathway-THCA
Description	GeneRatio	BgRatio	pvalue	p.adjust	qvalue	geneID	Count
SNRNP_ASSEMBLY	5/73	54/10968	2.78975e-05	0.00357192	0.0027637	PHAX/NUP153/NUP133/GEMIN5/NDC1	5
METABOLISM_OF_RNA	15/73	672/10968	2.86363e-05	0.00357192	0.0027637	CNOT1/UTP20/XRN2/PHAX/TSR1/CPSF2/NUP153/NUDT21/DHX9/NUP133/WDR3/WDR36/GEMIN5/NDC1/PRPF40A	15
REGULATION_OF_CHOLESTEROL_BIOSYNTHESIS_BY_SREBP_SREBF	5/73	55/10968	3.05292e-05	0.00357192	0.0027637	MED1/MTF1/SEC24B/KPNB1/SEC24A	5
MEMBRANE_TRAFFICKING	14/73	629/10968	5.70719e-05	0.00500806	0.00387488	TRIP11/RALGAPB/VPS4B/SEC23IP/SEC24B/EXOC2/EXOC5/PAFAH1B1/GOLGB1/CLTC/AP1G1/SEC24A/VAMP7/GOSR1	14
NUCLEAR_IMPORT_OF_REV_PROTEIN	4/73	34/10968	7.20117e-05	0.00505522	0.00391137	NUP153/NUP133/KPNB1/NDC1	4
INTERACTIONS_OF_REV_WITH_HOST_CELLULAR_PROTEINS	4/73	37/10968	0.000101019	0.0059096	0.00457243	NUP153/NUP133/KPNB1/NDC1	4
NS1_MEDIATED_EFFECTS_ON_HOST_PATHWAYS	4/73	41/10968	0.000151816	0.00717	0.00554764	NUP153/NUP133/KPNB1/NDC1	4
TRANSPORT_OF_MATURE_MRNAS_DERIVED_FROM_INTRONLESS_TRANSCRIPTS	4/73	43/10968	0.000183158	0.00717	0.00554764	CPSF2/NUP153/NUP133/NDC1	4
CLASS_I_MHC_MEDIATED_ANTIGEN_PROCESSING_PRESENTATION	10/73	377/10968	0.000183846	0.00717	0.00554764	FBXW11/HUWE1/SEC24B/TRIP12/ITCH/RNF111/PJA2/UBR4/TRIM37/SEC24A	10
ANTIVIRAL_MECHANISM_BY_IFN_STIMULATED_GENES	5/73	82/10968	0.000208328	0.00731232	0.00565775	NUP153/NUP133/KPNB1/NDC1/ARIH1	5
VESICLE_MEDIATED_TRANSPORT	14/73	724/10968	0.000253548	0.00809048	0.00625984	TRIP11/RALGAPB/VPS4B/SEC23IP/SEC24B/EXOC2/EXOC5/PAFAH1B1/GOLGB1/CLTC/AP1G1/SEC24A/VAMP7/GOSR1	14
GOLGI_ASSOCIATED_VESICLE_BIOGENESIS	4/73	56/10968	0.000510705	0.0149381	0.0115581	GOLGB1/CLTC/AP1G1/VAMP7	4
POSTMITOTIC_NUCLEAR_PORE_COMPLEX_NPC_REFORMATION	3/73	27/10968	0.000737727	0.0199186	0.0154116	NUP133/KPNB1/NDC1	3
HIV_INFECTION	7/73	231/10968	0.000839679	0.0210519	0.0162885	VPS4B/SUPT16H/NUP153/NUP133/KPNB1/NDC1/AP1G1	7
ANTIGEN_PROCESSING_UBIQUITINATION_PROTEASOME_DEGRADATION	8/73	308/10968	0.000972061	0.0227462	0.0175994	FBXW11/HUWE1/TRIP12/ITCH/RNF111/PJA2/UBR4/TRIM37	8
PROCESSING_OF_CAPPED_INTRON_CONTAINING_PRE_MRNA	7/73	242/10968	0.0011021	0.0241773	0.0187067	CPSF2/NUP153/NUDT21/DHX9/NUP133/NDC1/PRPF40A	7
REGULATION_OF_GLUCOKINASE_BY_GLUCOKINASE_REGULATORY_PROTEIN	3/73	32/10968	0.00122151	0.0247045	0.0191146	NUP153/NUP133/NDC1	3
TRANS_GOLGI_NETWORK_VESICLE_BUDDING	4/73	72/10968	0.00132043	0.0247045	0.0191146	GOLGB1/CLTC/AP1G1/VAMP7	4
EXPORT_OF_VIRAL_RIBONUCLEOPROTEINS_FROM_NUCLEUS	3/73	33/10968	0.00133728	0.0247045	0.0191146	NUP153/NUP133/NDC1	3
SUMOYLATION_OF_SUMOYLATION_PROTEINS	3/73	35/10968	0.00158899	0.025833	0.0199878	NUP153/NUP133/NDC1	3
LYSOSOME_VESICLE_BIOGENESIS	3/73	35/10968	0.00158899	0.025833	0.0199878	CLTC/AP1G1/VAMP7	3
TRANSPORT_OF_THE_SLBP_DEPENDANT_MATURE_MRNA	3/73	36/10968	0.00172521	0.025833	0.0199878	NUP153/NUP133/NDC1	3
NUCLEAR_PORE_COMPLEX_NPC_DISASSEMBLY	3/73	36/10968	0.00172521	0.025833	0.0199878	NUP153/NUP133/NDC1	3
HOST_INTERACTIONS_OF_HIV_FACTORS	5/73	131/10968	0.00176636	0.025833	0.0199878	NUP153/NUP133/KPNB1/NDC1/AP1G1	5
INTERACTIONS_OF_VPR_WITH_HOST_CELLULAR_PROTEINS	3/73	37/10968	0.00186852	0.0262341	0.0202981	NUP153/NUP133/NDC1	3
SUMOYLATION_OF_UBIQUITINYLATION_PROTEINS	3/73	39/10968	0.00217693	0.0293885	0.0227388	NUP153/NUP133/NDC1	3
TRANSPORT_OF_MATURE_TRANSCRIPT_TO_CYTOPLASM	4/73	84/10968	0.00233245	0.0303219	0.0234609	CPSF2/NUP153/NUP133/NDC1	4
ADAPTIVE_IMMUNE_SYSTEM	13/73	825/10968	0.00283695	0.0355632	0.0275163	FBXW11/HUWE1/MTOR/SEC24B/TRIP12/ITCH/RNF111/PJA2/UBR4/TRIM37/CLTC/AP1G1/SEC24A	13
VIRAL_MESSENGER_RNA_SYNTHESIS	3/73	44/10968	0.00308067	0.0359549	0.0278194	NUP153/NUP133/NDC1	3
HIV_LIFE_CYCLE	5/73	149/10968	0.00309527	0.0359549	0.0278194	VPS4B/SUPT16H/NUP153/NUP133/NDC1	5
RNA_POLYMERASE_II_TRANSCRIPTION	18/73	1374/10968	0.00324631	0.0359549	0.0278194	MED1/CNOT1/RAD50/ICE1/PHF20/PHAX/MTOR/PBRM1/AFF4/CPSF2/PPM1A/SUPT16H/ITCH/NUDT21/RNF111/CDC73/RBBP5/CDK12	18
METABOLISM_OF_STEROIDS	5/73	151/10968	0.00327794	0.0359549	0.0278194	MED1/MTF1/SEC24B/KPNB1/SEC24A	5
SUMOYLATION_OF_DNA_REPLICATION_PROTEINS	3/73	46/10968	0.00349762	0.037202	0.0287843	NUP153/NUP133/NDC1	3
ER_TO_GOLGI_ANTEROGRADE_TRANSPORT	5/73	155/10968	0.00366643	0.0372903	0.0288526	SEC23IP/SEC24B/GOLGB1/SEC24A/GOSR1	5
SUMOYLATION_OF_RNA_BINDING_PROTEINS	3/73	47/10968	0.00371841	0.0372903	0.0288526	NUP153/NUP133/NDC1	3
INFLUENZA_INFECTION	5/73	157/10968	0.00387262	0.0377581	0.0292145	NUP153/NUP133/KPNB1/NDC1/CLTC	5
CELLULAR_RESPONSE_TO_HEAT_STRESS	4/73	101/10968	0.00453484	0.0430197	0.0332856	MTOR/NUP153/NUP133/NDC1	4
NUCLEAR_ENVELOPE_BREAKDOWN	3/73	53/10968	0.00522134	0.0482287	0.037316	NUP153/NUP133/NDC1	3
TRANSCRIPTIONAL_REGULATION_BY_SMALL_RNAS	4/73	107/10968	0.00556335	0.0500702	0.0387408	IPO8/NUP153/NUP133/NDC1	4
DNA_REPAIR	7/73	332/10968	0.00643408	0.0561832	0.0434706	PRKDC/PARG/BAZ1B/RAD50/RNF111/USP1/RFC1	7
FORMATION_OF_RNA_POL_II_ELONGATION_COMPLEX	3/73	58/10968	0.0067165	0.0561832	0.0434706	AFF4/SUPT16H/CDC73	3
PROCESSING_OF_INTRONLESS_PRE_MRNAS	2/73	19/10968	0.00694419	0.0561832	0.0434706	CPSF2/NUDT21	2
SIGNALING_BY_FLT3_FUSION_PROTEINS	2/73	19/10968	0.00694419	0.0561832	0.0434706	TRIP11/GOLGB1	2
TRNA_PROCESSING_IN_THE_NUCLEUS	3/73	59/10968	0.00704291	0.0561832	0.0434706	NUP153/NUP133/NDC1	3
RRNA_MODIFICATION_IN_THE_NUCLEUS_AND_CYTOSOL	3/73	60/10968	0.00737861	0.0575532	0.0445306	UTP20/WDR3/WDR36	3
TRANSPORT_TO_THE_GOLGI_AND_SUBSEQUENT_MODIFICATION	5/73	186/10968	0.00787323	0.0600761	0.0464827	SEC23IP/SEC24B/GOLGB1/SEC24A/GOSR1	5
VXPX_CARGO_TARGETING_TO_CILIUM	2/73	21/10968	0.0084551	0.0631434	0.0488559	EXOC2/EXOC5	2
MHC_CLASS_II_ANTIGEN_PRESENTATION	4/73	126/10968	0.00981962	0.071806	0.0555584	SEC24B/CLTC/AP1G1/SEC24A	4
DOWNREGULATION_OF_SMAD2_3_SMAD4_TRANSCRIPTIONAL_ACTIVITY	2/73	23/10968	0.0100995	0.0723451	0.0559755	PPM1A/RNF111	2
COPII_MEDIATED_VESICLE_TRANSPORT	3/73	68/10968	0.0104054	0.0730462	0.056518	SEC23IP/SEC24B/SEC24A	3
INTERFERON_SIGNALING	5/73	203/10968	0.0112319	0.0748277	0.0578964	NUP153/NUP133/KPNB1/NDC1/ARIH1	5
RRNA_PROCESSING	5/73	205/10968	0.0116825	0.0748277	0.0578964	UTP20/XRN2/TSR1/WDR3/WDR36	5
SUMOYLATION_OF_CHROMATIN_ORGANIZATION_PROTEINS	3/73	71/10968	0.0117002	0.0748277	0.0578964	NUP153/NUP133/NDC1	3
RESOLUTION_OF_AP_SITES_VIA_THE_MULTIPLE_NUCLEOTIDE_PATCH_REPLACEMENT_PATHWAY	2/73	25/10968	0.0118735	0.0748277	0.0578964	PARG/RFC1	2
ANTIGEN_PRESENTATION_FOLDING_ASSEMBLY_AND_PEPTIDE_LOADING_OF_CLASS_I_MHC	2/73	25/10968	0.0118735	0.0748277	0.0578964	SEC24B/SEC24A	2
TRANSLOCATION_OF_SLC2A4_GLUT4_TO_THE_PLASMA_MEMBRANE	3/73	72/10968	0.0121515	0.0748277	0.0578964	RALGAPB/EXOC2/EXOC5	3
GLYCOLYSIS	3/73	72/10968	0.0121515	0.0748277	0.0578964	NUP153/NUP133/NDC1	3
INSULIN_PROCESSING	2/73	27/10968	0.0137737	0.0822283	0.0636225	EXOC2/EXOC5	2
GENE_SILENCING_BY_RNA	4/73	140/10968	0.0140331	0.0822283	0.0636225	IPO8/NUP153/NUP133/NDC1	4
NUCLEAR_ENVELOPE_NE_REASSEMBLY	3/73	76/10968	0.0140561	0.0822283	0.0636225	NUP133/KPNB1/NDC1	3
SUMOYLATION_OF_DNA_DAMAGE_RESPONSE_AND_REPAIR_PROTEINS	3/73	77/10968	0.0145573	0.08229	0.0636701	NUP153/NUP133/NDC1	3
PROCESSING_OF_CAPPED_INTRONLESS_PRE_MRNA	2/73	28/10968	0.01477	0.08229	0.0636701	CPSF2/NUDT21	2
FLT3_SIGNALING_IN_DISEASE	2/73	28/10968	0.01477	0.08229	0.0636701	TRIP11/GOLGB1	2
ENERGY_DEPENDENT_REGULATION_OF_MTOR_BY_LKB1_AMPK	2/73	29/10968	0.0157964	0.0866336	0.067031	MTOR/PPM1A	2
RECOGNITION_OF_DNA_DAMAGE_BY_PCNA_CONTAINING_REPLICATION_COMPLEX	2/73	30/10968	0.0168527	0.0910044	0.0704127	USP1/RFC1	2
REGULATION_OF_HSF1_MEDIATED_HEAT_SHOCK_RESPONSE	3/73	82/10968	0.0172144	0.0915494	0.0708344	NUP153/NUP133/NDC1	3
HEDGEHOG_ON_STATE	3/73	86/10968	0.0195228	0.102276	0.0791339	CSNK1A1/ITCH/CDC73	3
CARGO_CONCENTRATION_IN_THE_ER	2/73	33/10968	0.0201956	0.104245	0.0806573	SEC24B/SEC24A	2
REGULATION_OF_TP53_ACTIVITY	4/73	160/10968	0.0218098	0.110946	0.0858418	RAD50/PHF20/MTOR/SUPT16H	4
GLUCOSE_METABOLISM	3/73	92/10968	0.0232915	0.11679	0.0903638	NUP153/NUP133/NDC1	3
REGULATION_OF_TP53_EXPRESSION_AND_DEGRADATION	2/73	37/10968	0.0250438	0.12211	0.0944802	PHF20/MTOR	2
DNA_DOUBLE_STRAND_BREAK_REPAIR	4/73	167/10968	0.0250482	0.12211	0.0944802	PRKDC/BAZ1B/RAD50/RFC1	4
RESOLUTION_OF_ABASIC_SITES_AP_SITES	2/73	38/10968	0.026323	0.126567	0.0979283	PARG/RFC1	2
SLC_TRANSPORTER_DISORDERS	3/73	99/10968	0.0281533	0.133538	0.103322	NUP153/NUP133/NDC1	3
MTOR_SIGNALLING	2/73	41/10968	0.0303151	0.141875	0.109773	MTOR/PPM1A	2
ACTIVATION_OF_GENE_EXPRESSION_BY_SREBF_SREBP	2/73	42/10968	0.031696	0.146386	0.113263	MED1/MTF1	2
TRANSCRIPTIONAL_REGULATION_BY_TP53	6/73	363/10968	0.033495	0.152685	0.118137	CNOT1/RAD50/PHF20/MTOR/SUPT16H/CDK12	6
INTRA_GOLGI_TRAFFIC	2/73	44/10968	0.0345311	0.153423	0.118708	TRIP11/GOSR1	2
TRANSCRIPTIONAL_ACTIVITY_OF_SMAD2_SMAD3_SMAD4_HETEROTRIMER	2/73	44/10968	0.0345311	0.153423	0.118708	PPM1A/RNF111	2
CHROMATIN_MODIFYING_ENZYMES	5/73	274/10968	0.0355753	0.156087	0.120769	PHF20/KDM5A/PBRM1/KDM3B/RBBP5	5
MRNA_SPLICING	4/73	188/10968	0.0364394	0.157904	0.122175	CPSF2/NUDT21/DHX9/PRPF40A	4
TRNA_PROCESSING	3/73	111/10968	0.0376456	0.161142	0.12468	NUP153/NUP133/NDC1	3
SENSING_OF_DNA_DOUBLE_STRAND_BREAKS	1/73	6/10968	0.0392845	0.16577	0.128261	RAD50	1
CELL_CYCLE	9/73	693/10968	0.0396714	0.16577	0.128261	FBXW11/RAD50/PHF20/NUP153/NUP133/KPNB1/PAFAH1B1/NDC1/RFC1	9
DNA_DAMAGE_BYPASS	2/73	48/10968	0.040483	0.167171	0.129345	USP1/RFC1	2
HCMV_LATE_EVENTS	3/73	116/10968	0.0420266	0.171527	0.132716	NUP153/NUP133/NDC1	3
HDMS_DEMETHYLATE_HISTONES	2/73	50/10968	0.0435941	0.174288	0.134852	KDM5A/KDM3B	2
CARGO_TRAFFICKING_TO_THE_PERICILIARY_MEMBRANE	2/73	51/10968	0.0451822	0.174288	0.134852	EXOC2/EXOC5	2
CILIUM_ASSEMBLY	4/73	202/10968	0.0454566	0.174288	0.134852	TRIP11/EXOC2/EXOC5/PAFAH1B1	4
WAX_AND_PLASMALOGEN_BIOSYNTHESIS	1/73	7/10968	0.0456823	0.174288	0.134852	AGPS	1
TYSND1_CLEAVES_PEROXISOMAL_PROTEINS	1/73	7/10968	0.0456823	0.174288	0.134852	AGPS	1
DEX_H_BOX_HELICASES_ACTIVATE_TYPE_I_IFN_AND_INFLAMMATORY_CYTOKINES_PRODUCTION	1/73	7/10968	0.0456823	0.174288	0.134852	DHX9	1
ORGANELLE_BIOGENESIS_AND_MAINTENANCE	5/73	296/10968	0.0469837	0.177325	0.137202	MED1/TRIP11/EXOC2/EXOC5/PAFAH1B1	5

## Sheet: PAAD
Supplementary Table S6. The enrichment analysis of NUP155 in the REACTOME pathway-PAAD
Description	GeneRatio	BgRatio	pvalue	p.adjust	qvalue	geneID	Count
CELL_CYCLE	21/72	693/10968	1.74003e-09	6.47292e-07	5.23842e-07	RAD1/NUP205/POLA1/NIPBL/PDS5A/CKAP5/ANAPC1/POT1/SMC2/KPNB1/NUP188/XPO1/RAD21/NCAPG2/NCAPD3/LIN54/MAPRE1/SKP2/DKC1/PHF20/PPP2R5E	21
CELL_CYCLE_MITOTIC	17/72	561/10968	8.6355e-08	1.6062e-05	1.29987e-05	NUP205/POLA1/NIPBL/PDS5A/CKAP5/ANAPC1/SMC2/KPNB1/NUP188/XPO1/RAD21/NCAPG2/NCAPD3/LIN54/MAPRE1/SKP2/PPP2R5E	17
M_PHASE	14/72	417/10968	4.22104e-07	5.23409e-05	4.23585e-05	NUP205/NIPBL/PDS5A/CKAP5/ANAPC1/SMC2/KPNB1/NUP188/XPO1/RAD21/NCAPG2/NCAPD3/MAPRE1/PPP2R5E	14
MITOTIC_METAPHASE_AND_ANAPHASE	10/72	236/10968	2.92905e-06	0.000272402	0.00022045	NUP205/PDS5A/CKAP5/ANAPC1/KPNB1/NUP188/XPO1/RAD21/MAPRE1/PPP2R5E	10
PROCESSING_OF_CAPPED_INTRON_CONTAINING_PRE_MRNA	9/72	242/10968	2.70858e-05	0.00195266	0.00158025	NUP205/PRPF4/HNRNPK/NCBP1/NUP188/CPSF2/SNRNP200/SF3B3/DHX9	9
COHESIN_LOADING_ONTO_CHROMATIN	3/72	10/10968	3.14946e-05	0.00195266	0.00158025	NIPBL/PDS5A/RAD21	3
MITOTIC_TELOPHASE_CYTOKINESIS	3/72	13/10968	7.40063e-05	0.00393291	0.00318283	NIPBL/PDS5A/RAD21	3
INTERACTIONS_OF_REV_WITH_HOST_CELLULAR_PROTEINS	4/72	37/10968	9.57135e-05	0.00410643	0.00332326	NUP205/KPNB1/NUP188/XPO1	4
METABOLISM_OF_RNA	14/72	672/10968	9.93492e-05	0.00410643	0.00332326	PAIP1/NUP205/NSUN2/PRPF4/HNRNPK/NCBP1/NUP188/CPSF2/XPO1/SNRNP200/SF3B3/DHX9/DIS3/DKC1	14
RESOLUTION_OF_SISTER_CHROMATID_COHESION	6/72	126/10968	0.000171502	0.00587132	0.00475155	PDS5A/CKAP5/XPO1/RAD21/MAPRE1/PPP2R5E	6
TRANSPORT_OF_MATURE_MRNAS_DERIVED_FROM_INTRONLESS_TRANSCRIPTS	4/72	43/10968	0.000173614	0.00587132	0.00475155	NUP205/NCBP1/NUP188/CPSF2	4
SUMOYLATION	7/72	187/10968	0.000216433	0.00639953	0.00517902	NUP205/ZNF131/HNRNPK/NUP188/RAD21/SENP2/UBA2	7
MRNA_SPLICING	7/72	188/10968	0.000223639	0.00639953	0.00517902	PRPF4/HNRNPK/NCBP1/CPSF2/SNRNP200/SF3B3/DHX9	7
SEPARATION_OF_SISTER_CHROMATIDS	7/72	191/10968	0.000246429	0.00654798	0.00529916	PDS5A/CKAP5/ANAPC1/XPO1/RAD21/MAPRE1/PPP2R5E	7
DNA_REPAIR	9/72	332/10968	0.000303751	0.00753302	0.00609633	RAD1/PRKDC/POT1/DDB1/BAZ1B/CUL4B/PARG/USP10/MSH2	9
MITOTIC_PROMETAPHASE	7/72	203/10968	0.000357081	0.00830212	0.00671875	PDS5A/CKAP5/SMC2/XPO1/RAD21/MAPRE1/PPP2R5E	7
S_PHASE	6/72	162/10968	0.000661401	0.014473	0.0117127	POLA1/PDS5A/ANAPC1/RAD21/LIN54/SKP2	6
POSTMITOTIC_NUCLEAR_PORE_COMPLEX_NPC_REFORMATION	3/72	27/10968	0.00070857	0.0146438	0.0118509	NUP205/KPNB1/NUP188	3
MITOTIC_SPINDLE_CHECKPOINT	5/72	111/10968	0.000791505	0.0154968	0.0125413	CKAP5/ANAPC1/XPO1/MAPRE1/PPP2R5E	5
EXPORT_OF_VIRAL_RIBONUCLEOPROTEINS_FROM_NUCLEUS	3/72	33/10968	0.00128495	0.0239	0.0193418	NUP205/NUP188/XPO1	3
NUCLEAR_IMPORT_OF_REV_PROTEIN	3/72	34/10968	0.0014027	0.0248478	0.0201088	NUP205/KPNB1/NUP188	3
TRANSPORT_OF_THE_SLBP_DEPENDANT_MATURE_MRNA	3/72	36/10968	0.00165803	0.0280359	0.0226889	NUP205/NCBP1/NUP188	3
PROCESSING_AND_ACTIVATION_OF_SUMO	2/72	10/10968	0.0018484	0.0298958	0.0241941	SENP2/UBA2	2
TRANSPORT_OF_MATURE_TRANSCRIPT_TO_CYTOPLASM	4/72	84/10968	0.00221743	0.0334737	0.0270896	NUP205/NCBP1/NUP188/CPSF2	4
ESTABLISHMENT_OF_SISTER_CHROMATID_COHESION	2/72	11/10968	0.00224957	0.0334737	0.0270896	PDS5A/RAD21	2
NS1_MEDIATED_EFFECTS_ON_HOST_PATHWAYS	3/72	41/10968	0.00241808	0.0336053	0.0271962	NUP205/KPNB1/NUP188	3
MITOTIC_PROPHASE	5/72	143/10968	0.0024391	0.0336053	0.0271962	NUP205/SMC2/NUP188/NCAPG2/NCAPD3	5
HIV_LIFE_CYCLE	5/72	149/10968	0.0029146	0.0379933	0.0307472	NUP205/NCBP1/NUP188/XPO1/SUPT16H	5
CELL_CYCLE_CHECKPOINTS	7/72	292/10968	0.00296184	0.0379933	0.0307472	RAD1/CKAP5/ANAPC1/XPO1/MAPRE1/PHF20/PPP2R5E	7
TELOMERE_C_STRAND_SYNTHESIS_INITIATION	2/72	13/10968	0.00316333	0.0392253	0.0317443	POLA1/POT1	2
SUMOYLATION_OF_RNA_BINDING_PROTEINS	3/72	47/10968	0.00357626	0.0429151	0.0347304	NUP205/HNRNPK/NUP188	3
DNA_DAMAGE_BYPASS	3/72	48/10968	0.00379687	0.0441386	0.0357206	DDB1/CUL4B/USP10	3
HIV_INFECTION	6/72	231/10968	0.00401335	0.0452413	0.036613	NUP205/NCBP1/KPNB1/NUP188/XPO1/SUPT16H	6
EXTENSION_OF_TELOMERES	3/72	51/10968	0.00450789	0.0493217	0.0399151	POLA1/POT1/DKC1	3
MRNA_SPLICING_MINOR_PATHWAY	3/72	52/10968	0.00476158	0.0506088	0.0409568	NCBP1/SNRNP200/SF3B3	3
SNRNP_ASSEMBLY	3/72	54/10968	0.00529448	0.0547097	0.0442755	NUP205/NCBP1/NUP188	3
PROCESSING_OF_INTRONLESS_PRE_MRNAS	2/72	19/10968	0.00676089	0.0679744	0.0550104	NCBP1/CPSF2	2
ABERRANT_REGULATION_OF_MITOTIC_EXIT_IN_CANCER_DUE_TO_RB1_DEFECTS	2/72	20/10968	0.00748039	0.0732291	0.0592629	ANAPC1/SKP2	2
TP53_REGULATES_TRANSCRIPTION_OF_DNA_REPAIR_GENES	3/72	62/10968	0.00777707	0.0741813	0.0600335	CDK12/SUPT16H/MSH2	3
CYTOSOLIC_SENSORS_OF_PATHOGEN_ASSOCIATED_DNA	3/72	63/10968	0.00812797	0.0755901	0.0611737	PRKDC/DHX9/POLR3A	3
TELOMERE_EXTENSION_BY_TELOMERASE	2/72	23/10968	0.00983524	0.0892368	0.0722176	POT1/DKC1	2
HOST_INTERACTIONS_OF_HIV_FACTORS	4/72	131/10968	0.0106961	0.0947368	0.0766688	NUP205/KPNB1/NUP188/XPO1	4
POLYMERASE_SWITCHING_ON_THE_C_STRAND_OF_THE_TELOMERE	2/72	26/10968	0.0124752	0.10658	0.0862534	POLA1/POT1	2
CONDENSATION_OF_PROPHASE_CHROMOSOMES	3/72	74/10968	0.0126063	0.10658	0.0862534	SMC2/NCAPG2/NCAPD3	3
RHO_GTPASES_ACTIVATE_FORMINS	4/72	140/10968	0.0133936	0.109536	0.0886457	CKAP5/XPO1/MAPRE1/PPP2R5E	4
NUCLEAR_ENVELOPE_NE_REASSEMBLY	3/72	76/10968	0.0135448	0.109536	0.0886457	NUP205/KPNB1/NUP188	3
SUMOYLATION_OF_DNA_DAMAGE_RESPONSE_AND_REPAIR_PROTEINS	3/72	77/10968	0.0140287	0.111035	0.0898589	NUP205/NUP188/RAD21	3
PROCESSING_OF_CAPPED_INTRONLESS_PRE_MRNA	2/72	28/10968	0.0143879	0.111506	0.0902397	NCBP1/CPSF2	2
PROTEIN_UBIQUITINATION	3/72	79/10968	0.0150257	0.112241	0.0908344	PRKDC/UBE2K/OTULIN	3
G1_S_SPECIFIC_TRANSCRIPTION	2/72	29/10968	0.0153887	0.112241	0.0908344	POLA1/LIN54	2
ANTIGEN_PROCESSING_UBIQUITINATION_PROTEASOME_DEGRADATION	6/72	308/10968	0.0154699	0.112241	0.0908344	ANAPC1/HUWE1/ITCH/UBE2K/SKP2/UBE3C	6
RNA_POLYMERASE_II_TRANSCRIBES_SNRNA_GENES	3/72	81/10968	0.0160619	0.112241	0.0908344	ICE1/NCBP1/RPRD1B	3
SYNTHESIS_OF_ACTIVE_UBIQUITIN_ROLES_OF_E1_AND_E2_ENZYMES	2/72	30/10968	0.0164186	0.112241	0.0908344	UBE2K/OTULIN	2
RECOGNITION_OF_DNA_DAMAGE_BY_PCNA_CONTAINING_REPLICATION_COMPLEX	2/72	30/10968	0.0164186	0.112241	0.0908344	DDB1/CUL4B	2
ANTIVIRAL_MECHANISM_BY_IFN_STIMULATED_GENES	3/72	82/10968	0.0165947	0.112241	0.0908344	NUP205/KPNB1/NUP188	3
REGULATION_OF_GLUCOKINASE_BY_GLUCOKINASE_REGULATORY_PROTEIN	2/72	32/10968	0.0185641	0.123319	0.0997996	NUP205/NUP188	2
INFLUENZA_INFECTION	4/72	157/10968	0.0195941	0.127877	0.103489	NUP205/KPNB1/NUP188/XPO1	4
NEGATIVE_REGULATORS_OF_DDX58_IFIH1_SIGNALING	2/72	34/10968	0.0208212	0.131279	0.106242	ITCH/UBE2K	2
TELOMERE_C_STRAND_LAGGING_STRAND_SYNTHESIS	2/72	34/10968	0.0208212	0.131279	0.106242	POLA1/POT1	2
SUMOYLATION_OF_SUMOYLATION_PROTEINS	2/72	35/10968	0.0219905	0.136341	0.110338	NUP205/NUP188	2
NUCLEAR_PORE_COMPLEX_NPC_DISASSEMBLY	2/72	36/10968	0.0231865	0.1414	0.114432	NUP205/NUP188	2
INTERACTIONS_OF_VPR_WITH_HOST_CELLULAR_PROTEINS	2/72	37/10968	0.0244089	0.146453	0.118522	NUP205/NUP188	2
DNA_DAMAGE_RECOGNITION_IN_GG_NER	2/72	38/10968	0.0256571	0.149132	0.12069	DDB1/CUL4B	2
DISEASES_OF_MITOTIC_CELL_CYCLE	2/72	38/10968	0.0256571	0.149132	0.12069	ANAPC1/SKP2	2
SUMOYLATION_OF_UBIQUITINYLATION_PROTEINS	2/72	39/10968	0.0269309	0.154127	0.124732	NUP205/NUP188	2
DUAL_INCISION_IN_GG_NER	2/72	41/10968	0.0295534	0.166574	0.134805	DDB1/CUL4B	2
TRANSCRIPTIONAL_REGULATION_BY_TP53	6/72	363/10968	0.0315863	0.167402	0.135476	RAD1/CDK12/SUPT16H/LRPPRC/PHF20/MSH2	6
FORMATION_OF_INCISION_COMPLEX_IN_GG_NER	2/72	43/10968	0.0322736	0.167402	0.135476	DDB1/CUL4B	2
HIV_TRANSCRIPTION_ELONGATION	2/72	43/10968	0.0322736	0.167402	0.135476	NCBP1/SUPT16H	2
MATURATION_OF_SARS_COV_1_SPIKE_PROTEIN	1/72	5/10968	0.0324005	0.167402	0.135476	GANAB	1
SUMO_IS_CONJUGATED_TO_E1_UBA2_SAE1	1/72	5/10968	0.0324005	0.167402	0.135476	UBA2	1
DISEASES_OF_MISMATCH_REPAIR_MMR	1/72	5/10968	0.0324005	0.167402	0.135476	MSH2	1
VIRAL_MESSENGER_RNA_SYNTHESIS	2/72	44/10968	0.0336694	0.171576	0.138853	NUP205/NUP188	2
TRNA_PROCESSING	3/72	111/10968	0.0363586	0.181014	0.146491	NUP205/NSUN2/NUP188	3
SUMOYLATION_OF_DNA_REPLICATION_PROTEINS	2/72	46/10968	0.0365305	0.181014	0.146491	NUP205/NUP188	2
CLASS_I_MHC_MEDIATED_ANTIGEN_PROCESSING_PRESENTATION	6/72	377/10968	0.0369813	0.181014	0.146491	ANAPC1/HUWE1/ITCH/UBE2K/SKP2/UBE3C	6
TELOMERE_MAINTENANCE	3/72	113/10968	0.0380273	0.182493	0.147688	POLA1/POT1/DKC1	3
PRE_NOTCH_PROCESSING_IN_THE_ENDOPLASMIC_RETICULUM	1/72	6/10968	0.0387552	0.182493	0.147688	POFUT1	1
SUMO_IS_PROTEOLYTICALLY_PROCESSED	1/72	6/10968	0.0387552	0.182493	0.147688	SENP2	1
HCMV_LATE_EVENTS	3/72	116/10968	0.0406029	0.188803	0.152795	NUP205/HNRNPK/NUP188	3
MITOTIC_G2_G2_M_PHASES	4/72	200/10968	0.0422615	0.19409	0.157073	CKAP5/XPO1/LIN54/MAPRE1	4
POST_TRANSLATIONAL_PROTEIN_MODIFICATION	15/72	1435/10968	0.0436676	0.198102	0.16032	NUP205/ZNF131/PRKDC/HNRNPK/DDB1/NUP188/UBE2K/RAD21/OTULIN/CUL4B/SKP2/GANAB/SENP2/UBA2/USP10	15
SUMO_IS_TRANSFERRED_FROM_E1_TO_E2_UBE2I_UBC9	1/72	7/10968	0.0450688	0.199591	0.161525	UBA2	1
DEX_H_BOX_HELICASES_ACTIVATE_TYPE_I_IFN_AND_INFLAMMATORY_CYTOKINES_PRODUCTION	1/72	7/10968	0.0450688	0.199591	0.161525	DHX9	1
FORMATION_OF_TC_NER_PRE_INCISION_COMPLEX	2/72	53/10968	0.0472382	0.204333	0.165363	DDB1/CUL4B	2
NUCLEAR_ENVELOPE_BREAKDOWN	2/72	53/10968	0.0472382	0.204333	0.165363	NUP205/NUP188	2

## Sheet: THYM
Supplementary Table S6. The enrichment analysis of NUP155 in the REACTOME pathway-THYM
Description	GeneRatio	BgRatio	pvalue	p.adjust	qvalue	geneID	Count
CELL_CYCLE	26/67	693/10968	9.48917e-15	3.74822e-12	2.66696e-12	CKAP5/CDC27/MCM8/MAPRE1/SKP2/SMC1A/SMC2/XPO1/RMI1/YWHAQ/TOPBP1/ZW10/PPP2R5E/PDS5A/ANAPC1/PDS5B/GINS4/RFC1/NUP133/NUP205/CEP76/NDC1/POLA1/TUBGCP3/YWHAB/MIS18BP1	26
CELL_CYCLE_MITOTIC	21/67	561/10968	7.57292e-12	1.49565e-09	1.06419e-09	CKAP5/CDC27/MCM8/MAPRE1/SKP2/SMC1A/SMC2/XPO1/ZW10/PPP2R5E/PDS5A/ANAPC1/PDS5B/GINS4/RFC1/NUP133/NUP205/CEP76/NDC1/POLA1/TUBGCP3	21
MITOTIC_METAPHASE_AND_ANAPHASE	13/67	236/10968	1.38098e-09	1.81829e-07	1.29376e-07	CKAP5/CDC27/MAPRE1/SMC1A/XPO1/ZW10/PPP2R5E/PDS5A/ANAPC1/PDS5B/NUP133/NUP205/NDC1	13
M_PHASE	16/67	417/10968	2.71148e-09	2.26631e-07	1.61254e-07	CKAP5/CDC27/MAPRE1/SMC1A/SMC2/XPO1/ZW10/PPP2R5E/PDS5A/ANAPC1/PDS5B/NUP133/NUP205/CEP76/NDC1/TUBGCP3	16
MITOTIC_PROMETAPHASE	12/67	203/10968	2.86874e-09	2.26631e-07	1.61254e-07	CKAP5/MAPRE1/SMC1A/SMC2/XPO1/ZW10/PPP2R5E/PDS5A/PDS5B/NUP133/CEP76/TUBGCP3	12
CELL_CYCLE_CHECKPOINTS	13/67	292/10968	1.8092e-08	1.0385e-06	7.38922e-07	CKAP5/CDC27/MCM8/MAPRE1/XPO1/RMI1/YWHAQ/TOPBP1/ZW10/PPP2R5E/ANAPC1/NUP133/YWHAB	13
SEPARATION_OF_SISTER_CHROMATIDS	11/67	191/10968	1.84039e-08	1.0385e-06	7.38922e-07	CKAP5/CDC27/MAPRE1/SMC1A/XPO1/ZW10/PPP2R5E/PDS5A/ANAPC1/PDS5B/NUP133	11
S_PHASE	10/67	162/10968	4.49912e-08	2.22144e-06	1.58061e-06	CDC27/MCM8/SKP2/SMC1A/PDS5A/ANAPC1/PDS5B/GINS4/RFC1/POLA1	10
RESOLUTION_OF_SISTER_CHROMATID_COHESION	9/67	126/10968	6.37652e-08	2.79858e-06	1.99126e-06	CKAP5/MAPRE1/SMC1A/XPO1/ZW10/PPP2R5E/PDS5A/PDS5B/NUP133	9
MITOTIC_SPINDLE_CHECKPOINT	8/67	111/10968	3.38995e-07	1.33903e-05	9.52753e-06	CKAP5/CDC27/MAPRE1/XPO1/ZW10/PPP2R5E/ANAPC1/NUP133	8
PROCESSING_OF_CAPPED_INTRON_CONTAINING_PRE_MRNA	10/67	242/10968	1.86805e-06	6.708e-05	4.77292e-05	CPSF2/DDX46/HNRNPU/NCBP1/DHX15/HNRNPH1/NUP133/NUP205/HNRNPK/NDC1	10
TRANSPORT_OF_MATURE_MRNAS_DERIVED_FROM_INTRONLESS_TRANSCRIPTS	5/67	43/10968	5.88006e-06	0.000193552	0.000137717	CPSF2/NCBP1/NUP133/NUP205/NDC1	5
DNA_REPLICATION	7/67	128/10968	1.21603e-05	0.000369485	0.000262898	CDC27/MCM8/SKP2/ANAPC1/GINS4/RFC1/POLA1	7
COHESIN_LOADING_ONTO_CHROMATIN	3/67	10/10968	2.53584e-05	0.000715468	0.000509074	SMC1A/PDS5A/PDS5B	3
HIV_LIFE_CYCLE	7/67	149/10968	3.26111e-05	0.000857036	0.000609803	SUPT16H/NCBP1/XRCC5/XPO1/NUP133/NUP205/NDC1	7
ESTABLISHMENT_OF_SISTER_CHROMATID_COHESION	3/67	11/10968	3.47154e-05	0.000857036	0.000609803	SMC1A/PDS5A/PDS5B	3
DNA_STRAND_ELONGATION	4/67	32/10968	4.02089e-05	0.000934265	0.000664753	MCM8/GINS4/RFC1/POLA1	4
EXPORT_OF_VIRAL_RIBONUCLEOPROTEINS_FROM_NUCLEUS	4/67	33/10968	4.55453e-05	0.000999466	0.000711146	XPO1/NUP133/NUP205/NDC1	4
MITOTIC_TELOPHASE_CYTOKINESIS	3/67	13/10968	5.96486e-05	0.00124006	0.000882337	SMC1A/PDS5A/PDS5B	3
TRANSPORT_OF_THE_SLBP_DEPENDANT_MATURE_MRNA	4/67	36/10968	6.46664e-05	0.00127716	0.000908733	NCBP1/NUP133/NUP205/NDC1	4
INTERACTIONS_OF_REV_WITH_HOST_CELLULAR_PROTEINS	4/67	37/10968	7.21727e-05	0.00135753	0.000965921	XPO1/NUP133/NUP205/NDC1	4
HIV_INFECTION	8/67	231/10968	7.66907e-05	0.00137695	0.000979732	SUPT16H/NCBP1/XRCC5/XPO1/NUP133/NUP205/PAK2/NDC1	8
MRNA_SPLICING	7/67	188/10968	0.000141879	0.00238608	0.00169776	CPSF2/DDX46/HNRNPU/NCBP1/DHX15/HNRNPH1/HNRNPK	7
RHO_GTPASE_EFFECTORS	9/67	324/10968	0.000144977	0.00238608	0.00169776	CKAP5/MAPRE1/XPO1/YWHAQ/ZW10/PPP2R5E/NUP133/PAK2/YWHAB	9
TRANSPORT_OF_MATURE_TRANSCRIPT_TO_CYTOPLASM	5/67	84/10968	0.000155486	0.00245668	0.00174799	CPSF2/NCBP1/NUP133/NUP205/NDC1	5
DNA_REPAIR	9/67	332/10968	0.000174217	0.00261643	0.00186166	XRCC5/PARG/MSH6/RMI1/TOPBP1/MSH2/DCLRE1B/RFC1/BAZ1B	9
METABOLISM_OF_RNA	13/67	672/10968	0.000178845	0.00261643	0.00186166	CPSF2/DDX46/HNRNPU/NCBP1/NOL11/DHX15/XPO1/HNRNPH1/NUP133/NUP205/HNRNPK/NDC1/YWHAB	13
SUMOYLATION_OF_RNA_BINDING_PROTEINS	4/67	47/10968	0.000186176	0.00262641	0.00186876	NUP133/NUP205/HNRNPK/NDC1	4
RHO_GTPASES_ACTIVATE_FORMINS	6/67	140/10968	0.000204545	0.00278605	0.00198234	CKAP5/MAPRE1/XPO1/ZW10/PPP2R5E/NUP133	6
ABERRANT_REGULATION_OF_MITOTIC_EXIT_IN_CANCER_DUE_TO_RB1_DEFECTS	3/67	20/10968	0.00023059	0.0030361	0.00216026	CDC27/SKP2/ANAPC1	3
SNRNP_ASSEMBLY	4/67	54/10968	0.000319682	0.00407337	0.00289831	NCBP1/NUP133/NUP205/NDC1	4
DISEASES_OF_MISMATCH_REPAIR_MMR	2/67	5/10968	0.000363285	0.00448429	0.00319069	MSH6/MSH2	2
POSTMITOTIC_NUCLEAR_PORE_COMPLEX_NPC_REFORMATION	3/67	27/10968	0.000573831	0.00686859	0.00488718	NUP133/NUP205/NDC1	3
REGULATION_OF_GLUCOKINASE_BY_GLUCOKINASE_REGULATORY_PROTEIN	3/67	32/10968	0.000952071	0.0110608	0.00787006	NUP133/NUP205/NDC1	3
NUCLEAR_IMPORT_OF_REV_PROTEIN	3/67	34/10968	0.00113866	0.0128506	0.00914352	NUP133/NUP205/NDC1	3
HOST_INTERACTIONS_OF_HIV_FACTORS	5/67	131/10968	0.00120224	0.0128894	0.00917116	XPO1/NUP133/NUP205/PAK2/NDC1	5
SUMOYLATION_OF_DNA_DAMAGE_RESPONSE_AND_REPAIR_PROTEINS	4/67	77/10968	0.0012314	0.0128894	0.00917116	SMC1A/NUP133/NUP205/NDC1	4
SUMOYLATION_OF_SUMOYLATION_PROTEINS	3/67	35/10968	0.00124	0.0128894	0.00917116	NUP133/NUP205/NDC1	3
NUCLEAR_PORE_COMPLEX_NPC_DISASSEMBLY	3/67	36/10968	0.00134684	0.0136411	0.009706	NUP133/NUP205/NDC1	3
INTERACTIONS_OF_VPR_WITH_HOST_CELLULAR_PROTEINS	3/67	37/10968	0.00145931	0.0143213	0.01019	NUP133/NUP205/NDC1	3
RECRUITMENT_OF_MITOTIC_CENTROSOME_PROTEINS_AND_COMPLEXES	4/67	81/10968	0.00148652	0.0143213	0.01019	CKAP5/MAPRE1/CEP76/TUBGCP3	4
ANTIVIRAL_MECHANISM_BY_IFN_STIMULATED_GENES	4/67	82/10968	0.00155564	0.0144911	0.0103108	EIF4G2/NUP133/NUP205/NDC1	4
DISEASES_OF_MITOTIC_CELL_CYCLE	3/67	38/10968	0.00157752	0.0144911	0.0103108	CDC27/SKP2/ANAPC1	3
SUMOYLATION_OF_UBIQUITINYLATION_PROTEINS	3/67	39/10968	0.00170155	0.0152753	0.0108688	NUP133/NUP205/NDC1	3
NS1_MEDIATED_EFFECTS_ON_HOST_PATHWAYS	3/67	41/10968	0.00196755	0.0172707	0.0122885	NUP133/NUP205/NDC1	3
DEACTIVATION_OF_THE_BETA_CATENIN_TRANSACTIVATING_COMPLEX	3/67	42/10968	0.0021097	0.0180639	0.0128529	XPO1/RBBP5/ASH2L	3
SWITCHING_OF_ORIGINS_TO_A_POST_REPLICATIVE_STATE	4/67	91/10968	0.00228154	0.0180639	0.0128529	CDC27/MCM8/SKP2/ANAPC1	4
PURINE_RIBONUCLEOSIDE_MONOPHOSPHATE_BIOSYNTHESIS	2/67	12/10968	0.0023323	0.0180639	0.0128529	GMPS/GART	2
REGULATION_OF_LOCALIZATION_OF_FOXO_TRANSCRIPTION_FACTORS	2/67	12/10968	0.0023323	0.0180639	0.0128529	YWHAQ/YWHAB	2
DISEASES_OF_DNA_REPAIR	2/67	12/10968	0.0023323	0.0180639	0.0128529	MSH6/MSH2	2
UNWINDING_OF_DNA	2/67	12/10968	0.0023323	0.0180639	0.0128529	MCM8/GINS4	2
VIRAL_MESSENGER_RNA_SYNTHESIS	3/67	44/10968	0.0024128	0.018328	0.0130409	NUP133/NUP205/NDC1	3
G2_M_DNA_DAMAGE_CHECKPOINT	4/67	95/10968	0.00266858	0.0193657	0.0137792	RMI1/YWHAQ/TOPBP1/YWHAB	4
RECRUITMENT_OF_NUMA_TO_MITOTIC_CENTROSOMES	4/67	95/10968	0.00266858	0.0193657	0.0137792	CKAP5/MAPRE1/CEP76/TUBGCP3	4
SUMOYLATION_OF_DNA_REPLICATION_PROTEINS	3/67	46/10968	0.00274158	0.0193657	0.0137792	NUP133/NUP205/NDC1	3
CHK1_CHK2_CDS1_MEDIATED_INACTIVATION_OF_CYCLIN_B_CDK1_COMPLEX	2/67	13/10968	0.00274551	0.0193657	0.0137792	YWHAQ/YWHAB	2
HCMV_INFECTION	5/67	162/10968	0.00305294	0.0211564	0.0150533	NUP133/NUP205/HNRNPK/NDC1/CBX1	5
POLYMERASE_SWITCHING	2/67	14/10968	0.0031905	0.0217284	0.0154603	RFC1/POLA1	2
DNA_DOUBLE_STRAND_BREAK_REPAIR	5/67	167/10968	0.00347859	0.0229907	0.0163585	XRCC5/RMI1/TOPBP1/RFC1/BAZ1B	5
G2_M_CHECKPOINTS	5/67	168/10968	0.00356859	0.0229907	0.0163585	MCM8/RMI1/YWHAQ/TOPBP1/YWHAB	5
ACTIVATION_OF_BAD_AND_TRANSLOCATION_TO_MITOCHONDRIA	2/67	15/10968	0.00366688	0.0229907	0.0163585	YWHAQ/YWHAB	2
NUCLEOBASE_BIOSYNTHESIS	2/67	15/10968	0.00366688	0.0229907	0.0163585	GMPS/GART	2
MISMATCH_REPAIR	2/67	15/10968	0.00366688	0.0229907	0.0163585	MSH6/MSH2	2
NUCLEAR_ENVELOPE_BREAKDOWN	3/67	53/10968	0.00410421	0.0253307	0.0180234	NUP133/NUP205/NDC1	3
HCMV_LATE_EVENTS	4/67	116/10968	0.00545542	0.0331026	0.0235534	NUP133/NUP205/HNRNPK/NDC1	4
TRNA_PROCESSING_IN_THE_NUCLEUS	3/67	59/10968	0.00554935	0.0331026	0.0235534	NUP133/NUP205/NDC1	3
SUMOYLATION	5/67	187/10968	0.00561487	0.0331026	0.0235534	SMC1A/NUP133/NUP205/HNRNPK/NDC1	5
PROCESSING_OF_INTRONLESS_PRE_MRNAS	2/67	19/10968	0.00587852	0.0341473	0.0242967	CPSF2/NCBP1	2
LAGGING_STRAND_SYNTHESIS	2/67	20/10968	0.00650607	0.0361957	0.0257542	RFC1/POLA1	2
CONVERSION_FROM_APC_C_CDC20_TO_APC_C_CDH1_IN_LATE_ANAPHASE	2/67	20/10968	0.00650607	0.0361957	0.0257542	CDC27/ANAPC1	2
PHOSPHORYLATION_OF_THE_APC_C	2/67	20/10968	0.00650607	0.0361957	0.0257542	CDC27/ANAPC1	2
INHIBITION_OF_THE_PROTEOLYTIC_ACTIVITY_OF_APC_C_REQUIRED_FOR_THE_ONSET_OF_ANAPHASE_BY_MITOTIC_SPINDLE_CHECKPOINT_COMPONENTS	2/67	21/10968	0.00716272	0.0392955	0.0279597	CDC27/ANAPC1	2
MITOTIC_G2_G2_M_PHASES	5/67	200/10968	0.00742196	0.0396637	0.0282218	CKAP5/MAPRE1/XPO1/CEP76/TUBGCP3	5
RNA_POLYMERASE_II_TRANSCRIPTION	16/67	1374/10968	0.00743067	0.0396637	0.0282218	SUPT16H/CPSF2/CDC27/NCBP1/SKP2/ARID1A/ZNF669/RMI1/YWHAQ/TOPBP1/MSH2/RBBP5/ANAPC1/ASH2L/YWHAB/ZNF670	16
E2F_MEDIATED_REGULATION_OF_DNA_REPLICATION	2/67	22/10968	0.00784811	0.0410554	0.029212	MCM8/POLA1	2
HDR_THROUGH_HOMOLOGOUS_RECOMBINATION_HRR	3/67	67/10968	0.00789927	0.0410554	0.029212	RMI1/TOPBP1/RFC1	3
SUMOYLATION_OF_CHROMATIN_ORGANIZATION_PROTEINS	3/67	71/10968	0.00926308	0.0471147	0.0335233	NUP133/NUP205/NDC1	3
APC_C_CDC20_MEDIATED_DEGRADATION_OF_CYCLIN_B	2/67	24/10968	0.00930366	0.0471147	0.0335233	CDC27/ANAPC1	2
GLYCOLYSIS	3/67	72/10968	0.00962419	0.0475194	0.0338113	NUP133/NUP205/NDC1	3
AURKA_ACTIVATION_BY_TPX2	3/67	72/10968	0.00962419	0.0475194	0.0338113	CKAP5/MAPRE1/CEP76	3
HCMV_EARLY_EVENTS	4/67	138/10968	0.00997369	0.0485228	0.0345252	NUP133/NUP205/NDC1/CBX1	4
RESOLUTION_OF_AP_SITES_VIA_THE_MULTIPLE_NUCLEOTIDE_PATCH_REPLACEMENT_PATHWAY	2/67	25/10968	0.0100731	0.0485228	0.0345252	PARG/RFC1	2
APC_C_CDH1_MEDIATED_DEGRADATION_OF_CDC20_AND_OTHER_APC_C_CDH1_TARGETED_PROTEINS_IN_LATE_MITOSIS_EARLY_G1	3/67	74/10968	0.0103708	0.0493552	0.0351175	CDC27/SKP2/ANAPC1	3
POLYMERASE_SWITCHING_ON_THE_C_STRAND_OF_THE_TELOMERE	2/67	26/10968	0.0108698	0.0505127	0.0359411	RFC1/POLA1	2
APC_CDC20_MEDIATED_DEGRADATION_OF_NEK2A	2/67	26/10968	0.0108698	0.0505127	0.0359411	CDC27/ANAPC1	2
NUCLEAR_ENVELOPE_NE_REASSEMBLY	3/67	76/10968	0.0111503	0.0505415	0.0359615	NUP133/NUP205/NDC1	3
SIGNALING_BY_RHO_GTPASES_MIRO_GTPASES_AND_RHOBTB3	10/67	717/10968	0.0112096	0.0505415	0.0359615	CKAP5/MAPRE1/XPO1/YWHAQ/ZW10/PPP2R5E/NUP133/PAK2/YWHAB/ARHGAP32	10
MITOTIC_PROPHASE	4/67	143/10968	0.0112599	0.0505415	0.0359615	SMC2/NUP133/NUP205/NDC1	4
FGFR2_ALTERNATIVE_SPLICING	2/67	27/10968	0.0116935	0.0518981	0.0369269	NCBP1/HNRNPH1	2
PROCESSING_OF_CAPPED_INTRONLESS_PRE_MRNA	2/67	28/10968	0.0125438	0.0550533	0.0391718	CPSF2/NCBP1	2
REGULATION_OF_HSF1_MEDIATED_HEAT_SHOCK_RESPONSE	3/67	82/10968	0.013688	0.0594149	0.0422752	NUP133/NUP205/NDC1	3
ACTIVATION_OF_BH3_ONLY_PROTEINS	2/67	30/10968	0.0143228	0.0614944	0.0437549	YWHAQ/YWHAB	2
INFLUENZA_INFECTION	4/67	157/10968	0.0154163	0.0654777	0.0465891	XPO1/NUP133/NUP205/NDC1	4
REGULATION_OF_PLK1_ACTIVITY_AT_G2_M_TRANSITION	3/67	87/10968	0.016034	0.0673771	0.0479405	CKAP5/MAPRE1/CEP76	3
APC_C_MEDIATED_DEGRADATION_OF_CELL_CYCLE_PROTEINS	3/67	88/10968	0.0165287	0.0687247	0.0488994	CDC27/SKP2/ANAPC1	3
ACTIVATION_OF_THE_PRE_REPLICATIVE_COMPLEX	2/67	33/10968	0.0171822	0.0706974	0.050303	MCM8/POLA1	2
TELOMERE_C_STRAND_LAGGING_STRAND_SYNTHESIS	2/67	34/10968	0.0181849	0.0732962	0.0521521	RFC1/POLA1	2
RAF_ACTIVATION	2/67	34/10968	0.0181849	0.0732962	0.0521521	PPP2R5E/YWHAB	2
REGULATION_OF_TP53_ACTIVITY_THROUGH_PHOSPHORYLATION	3/67	92/10968	0.0185928	0.0734417	0.0522557	SUPT16H/RMI1/TOPBP1	3
GLUCOSE_METABOLISM	3/67	92/10968	0.0185928	0.0734417	0.0522557	NUP133/NUP205/NDC1	3
HDR_THROUGH_SINGLE_STRAND_ANNEALING_SSA	2/67	37/10968	0.0213372	0.0827404	0.0588719	RMI1/TOPBP1	2
ANCHORING_OF_THE_BASAL_BODY_TO_THE_PLASMA_MEMBRANE	3/67	97/10968	0.0213659	0.0827404	0.0588719	CKAP5/MAPRE1/CEP76	3
RESOLUTION_OF_ABASIC_SITES_AP_SITES	2/67	38/10968	0.022435	0.0855906	0.0608999	PARG/RFC1	2
SLC_TRANSPORTER_DISORDERS	3/67	99/10968	0.0225352	0.0855906	0.0608999	NUP133/NUP205/NDC1	3
TRANSCRIPTIONAL_REGULATION_BY_TP53	6/67	363/10968	0.02311	0.0869378	0.0618584	SUPT16H/RMI1/YWHAQ/TOPBP1/MSH2/YWHAB	6
CELLULAR_RESPONSE_TO_HEAT_STRESS	3/67	101/10968	0.023739	0.0884615	0.0629427	NUP133/NUP205/NDC1	3
TRANSCRIPTIONAL_REGULATION_BY_VENTX	2/67	41/10968	0.0258648	0.0954822	0.067938	CDC27/ANAPC1	2
HOMOLOGOUS_DNA_PAIRING_AND_STRAND_EXCHANGE	2/67	42/10968	0.0270525	0.0985512	0.0701217	RMI1/TOPBP1	2
CLASS_I_MHC_MEDIATED_ANTIGEN_PROCESSING_PRESENTATION	6/67	377/10968	0.0271951	0.0985512	0.0701217	CDC27/SKP2/ANAPC1/CHUK/TRIM37/TRIP12	6
TRANSCRIPTIONAL_REGULATION_BY_SMALL_RNAS	3/67	107/10968	0.0275568	0.0989541	0.0704084	NUP133/NUP205/NDC1	3
HIV_TRANSCRIPTION_ELONGATION	2/67	43/10968	0.028262	0.0996741	0.0709207	SUPT16H/NCBP1	2
NEGATIVE_REGULATION_OF_MAPK_PATHWAY	2/67	43/10968	0.028262	0.0996741	0.0709207	PPP2R5E/YWHAB	2
TRNA_PROCESSING	3/67	111/10968	0.0302737	0.105824	0.0752965	NUP133/NUP205/NDC1	3
INTERFERON_SIGNALING	4/67	203/10968	0.0353507	0.122487	0.0871527	EIF4G2/NUP133/NUP205/NDC1	4
EXTENSION_OF_TELOMERES	2/67	51/10968	0.0386847	0.132873	0.0945428	RFC1/POLA1	2
ANTIGEN_PROCESSING_UBIQUITINATION_PROTEASOME_DEGRADATION	5/67	308/10968	0.0396946	0.135167	0.0961748	CDC27/SKP2/ANAPC1/TRIM37/TRIP12	5
2_LTR_CIRCLE_FORMATION	1/67	7/10968	0.0419963	0.1394	0.0991864	XRCC5	1
ARMS_MEDIATED_ACTIVATION	1/67	7/10968	0.0419963	0.1394	0.0991864	YWHAB	1
IKBA_VARIANT_LEADS_TO_EDA_ID	1/67	7/10968	0.0419963	0.1394	0.0991864	CHUK	1
RHOJ_GTPASE_CYCLE	2/67	55/10968	0.044364	0.144824	0.103046	PAK2/ARHGAP32	2
INTRINSIC_PATHWAY_FOR_APOPTOSIS	2/67	55/10968	0.044364	0.144824	0.103046	YWHAQ/YWHAB	2
POLB_DEPENDENT_LONG_PATCH_BASE_EXCISION_REPAIR	1/67	8/10968	0.0478522	0.148832	0.105898	PARG	1
DNA_REPLICATION_INITIATION	1/67	8/10968	0.0478522	0.148832	0.105898	POLA1	1
SIGNALING_BY_MRAS_COMPLEX_MUTANTS	1/67	8/10968	0.0478522	0.148832	0.105898	YWHAB	1
CHREBP_ACTIVATES_METABOLIC_GENE_EXPRESSION	1/67	8/10968	0.0478522	0.148832	0.105898	ACLY	1
NEF_AND_SIGNAL_TRANSDUCTION	1/67	8/10968	0.0478522	0.148832	0.105898	PAK2	1
HUR_ELAVL1_BINDS_AND_STABILIZES_MRNA	1/67	8/10968	0.0478522	0.148832	0.105898	XPO1	1
FORMATION_OF_RNA_POL_II_ELONGATION_COMPLEX	2/67	58/10968	0.0488137	0.150636	0.107181	SUPT16H/NCBP1	2
