# Supplementary material for: Pan-cancer analysis of NUP155 and validation of its role in breast cancer cell proliferation, migration, and apoptosis
Source: BMC Cancer. 2024 Mar 19;24:353. doi: 10.1186/s12885-024-12039-6 (PMC10953186; doi:10.1186/s12885-024-12039-6)
Supplement: Supplementary file 9 — Additional file 9: Supplementary figure 8. Relative mRNA expression of NUP155 in normal breast cell and breast cancer cell lines. *p < 0.05 and **p < 0.01. [file 12885_2024_12039_MOESM9_ESM.xlsx]

## Sheet: Sheet1
Supplementary Table S7. Genes interacting with NUP155 in the PPI network
Symbol	Description	Score	Functions	Links
NUP155		0.89099	ADP metabolic process, ATP generation from ADP, ATP metabolic process, carbohydrate catabolic process, cellular response to heat, establishment of RNA localization, gene silencing, gene silencing by miRNA, gene silencing by RNA, glycolytic process, import into nucleus, mRNA transport, mRNA-containing ribonucleoprotein complex export from nucleus, multi-organism localization, multi-organism transp…	http://www.ncbi.nlm.nih.gov/sites/entrez?db=gene&cmd=search&term=9631
NUP133		0.00508777	ADP metabolic process, ATP generation from ADP, ATP metabolic process, carbohydrate catabolic process, cellular response to heat, establishment of RNA localization, gene silencing, gene silencing by miRNA, gene silencing by RNA, glycolytic process, import into nucleus, mRNA transport, mRNA-containing ribonucleoprotein complex export from nucleus, multi-organism localization, multi-organism transp…	http://www.ncbi.nlm.nih.gov/sites/entrez?db=gene&cmd=search&term=55746
GLE1		0.00206012	establishment of RNA localization, mRNA transport, mRNA-containing ribonucleoprotein complex export from nucleus, nuclear envelope, nuclear export, nuclear pore, nuclear transport, nucleic acid transport, nucleobase-containing compound transport, nucleocytoplasmic transport, protein export from nucleus, protein-containing complex localization, ribonucleoprotein complex export from nucleus, ribonu…	http://www.ncbi.nlm.nih.gov/sites/entrez?db=gene&cmd=search&term=2733
REG1B		0.00169864		http://www.ncbi.nlm.nih.gov/sites/entrez?db=gene&cmd=search&term=5968
SNX5		0.00136462		http://www.ncbi.nlm.nih.gov/sites/entrez?db=gene&cmd=search&term=27131
TACC2		0.00117435		http://www.ncbi.nlm.nih.gov/sites/entrez?db=gene&cmd=search&term=10579
GCKR		0.000537481	ADP metabolic process, ATP generation from ADP, ATP metabolic process, carbohydrate catabolic process, glycolytic process, import into nucleus, nuclear transport, nucleocytoplasmic transport, nucleoside diphosphate metabolic process, nucleoside diphosphate phosphorylation, nucleotide phosphorylation, protein import, protein localization to nucleus, purine nucleoside diphosphate metabolic process,…	http://www.ncbi.nlm.nih.gov/sites/entrez?db=gene&cmd=search&term=2646
PINK1		0.000476832	ATP metabolic process, regulation of ATP metabolic process, regulation of generation of precursor metabolites and energy, regulation of nucleotide metabolic process, regulation of purine nucleotide metabolic process	http://www.ncbi.nlm.nih.gov/sites/entrez?db=gene&cmd=search&term=65018
PHAX		0.000473704	establishment of RNA localization, ncRNA export from nucleus, nuclear export, nuclear transport, nucleic acid transport, nucleobase-containing compound transport, nucleocytoplasmic transport, RNA export from nucleus, RNA localization, RNA transport	http://www.ncbi.nlm.nih.gov/sites/entrez?db=gene&cmd=search&term=51808
LYAR		0.000460588		http://www.ncbi.nlm.nih.gov/sites/entrez?db=gene&cmd=search&term=55646
SNUPN		0.000458851	nuclear envelope, nuclear transport, nucleocytoplasmic transport	http://www.ncbi.nlm.nih.gov/sites/entrez?db=gene&cmd=search&term=10073
OTUD7B		0.000456313	protein localization to nucleus	http://www.ncbi.nlm.nih.gov/sites/entrez?db=gene&cmd=search&term=56957
SLBP		0.000433372	establishment of RNA localization, mRNA transport, mRNA-containing ribonucleoprotein complex export from nucleus, nuclear export, nuclear transport, nucleic acid transport, nucleobase-containing compound transport, nucleocytoplasmic transport, protein export from nucleus, protein-containing complex localization, ribonucleoprotein complex export from nucleus, ribonucleoprotein complex localization…	http://www.ncbi.nlm.nih.gov/sites/entrez?db=gene&cmd=search&term=7884
DDX20		0.0004091	nuclear transport, nucleocytoplasmic transport, SMN-Sm protein complex	http://www.ncbi.nlm.nih.gov/sites/entrez?db=gene&cmd=search&term=11218
KPNB1		0.000407051	import into nucleus, multi-organism localization, multi-organism transport, nuclear envelope, nuclear transport, nucleocytoplasmic transport, protein import, protein localization to nucleus, transport of virus, viral life cycle	http://www.ncbi.nlm.nih.gov/sites/entrez?db=gene&cmd=search&term=3837
NUP205		0.000395644	ADP metabolic process, ATP generation from ADP, ATP metabolic process, carbohydrate catabolic process, cellular response to heat, establishment of RNA localization, gene silencing, gene silencing by miRNA, gene silencing by RNA, glycolytic process, mRNA transport, mRNA-containing ribonucleoprotein complex export from nucleus, multi-organism localization, multi-organism transport, ncRNA export fro…	http://www.ncbi.nlm.nih.gov/sites/entrez?db=gene&cmd=search&term=23165
NUP35		0.000381758	ADP metabolic process, ATP generation from ADP, ATP metabolic process, carbohydrate catabolic process, cellular response to heat, establishment of RNA localization, gene silencing, gene silencing by miRNA, gene silencing by RNA, glycolytic process, import into nucleus, mRNA transport, mRNA-containing ribonucleoprotein complex export from nucleus, multi-organism localization, multi-organism transp…	http://www.ncbi.nlm.nih.gov/sites/entrez?db=gene&cmd=search&term=129401
GCK		0.000370216	ADP metabolic process, ATP generation from ADP, ATP metabolic process, carbohydrate catabolic process, glycolytic process, nucleoside diphosphate metabolic process, nucleoside diphosphate phosphorylation, nucleotide phosphorylation, purine nucleoside diphosphate metabolic process, purine ribonucleoside diphosphate metabolic process, pyruvate metabolic process, regulation of ATP metabolic process,…	http://www.ncbi.nlm.nih.gov/sites/entrez?db=gene&cmd=search&term=2645
BRCA1		0.000359485		http://www.ncbi.nlm.nih.gov/sites/entrez?db=gene&cmd=search&term=672
NUP88		0.000355781	ADP metabolic process, ATP generation from ADP, ATP metabolic process, carbohydrate catabolic process, cellular response to heat, establishment of RNA localization, gene silencing, gene silencing by miRNA, gene silencing by RNA, glycolytic process, import into nucleus, mRNA transport, mRNA-containing ribonucleoprotein complex export from nucleus, multi-organism localization, multi-organism transp…	http://www.ncbi.nlm.nih.gov/sites/entrez?db=gene&cmd=search&term=4927
GEMIN7		0.000354266	nuclear transport, nucleocytoplasmic transport, SMN-Sm protein complex	http://www.ncbi.nlm.nih.gov/sites/entrez?db=gene&cmd=search&term=79760
