# Supplementary material for: Pan-cancer analysis of NUP155 and validation of its role in breast cancer cell proliferation, migration, and apoptosis
Source: BMC Cancer. 2024 Mar 19;24:353. doi: 10.1186/s12885-024-12039-6 (PMC10953186; doi:10.1186/s12885-024-12039-6)
Supplement: Supplementary file 10 — Additional file 10: Supplementary table S1. The R-Scripts and online tools in this study. Supplementary table S2. The detail results of the methylation levels of NUP155 in pan-cancer. Supplementary table S3. The landscape of NUP155 copy number variation (CNV) in different cancer types. Supplementary table S4. The correlation between NUP155 expression levels and drug sensitivity in the CTRP database. Supplementary table S5. The correlation between NUP155 expression levels and drug sensitivity in the GDSC database. Supplementary table S6. The enrichment analysis of NUP155 in the REACTOME pathway. Supplementary table S7. Genes interacting with NUP155 in the PPI network. Supplementary table S8. Functional enrichment of genes interacting with NUP155 in the PPI network. [file 12885_2024_12039_MOESM10_ESM.xlsx]

## Sheet: Sheet1
Supplementary Table S8. Functional enrichment of genes interacting with NUP155 in the PPI network
Function	FDR	Genes in network	Genes in genome
nuclear transport	2.2e-15	13	291
nucleocytoplasmic transport	2.2e-15	13	287
regulation of ATP metabolic process	2.73e-10	8	100
regulation of purine nucleotide metabolic process	2.73e-10	8	98
regulation of nucleotide metabolic process	2.73e-10	8	101
regulation of generation of precursor metabolites and energy	2.36e-09	8	136
RNA export from nucleus	2.36e-09	8	137
regulation of carbohydrate catabolic process	2.38e-09	7	75
ncRNA export from nucleus	3.96e-09	6	38
RNA transport	4.74e-09	8	156
nucleic acid transport	5.84e-09	8	162
establishment of RNA localization	6.21e-09	8	165
glycolytic process	7.48e-09	7	94
ADP metabolic process	1.06e-08	7	102
nuclear export	1.06e-08	8	184
ATP generation from ADP	1.06e-08	7	100
nucleoside diphosphate phosphorylation	1.06e-08	7	101
purine ribonucleoside diphosphate metabolic process	1.19e-08	7	105
purine nucleoside diphosphate metabolic process	1.21e-08	7	106
nucleobase-containing compound transport	1.3e-08	8	195
nucleotide phosphorylation	1.3e-08	7	109
ribonucleoside diphosphate metabolic process	1.3e-08	7	109
mRNA transport	1.36e-08	7	112
RNA localization	1.36e-08	8	198
mRNA-containing ribonucleoprotein complex export from nucleus	1.36e-08	7	112
pyruvate metabolic process	2.14e-08	7	120
nucleoside diphosphate metabolic process	2.32e-08	7	122
transport of virus	2.79e-08	6	62
ribonucleoprotein complex export from nucleus	3.1e-08	7	129
ribonucleoprotein complex localization	3.1e-08	7	129
multi-organism transport	3.27e-08	6	65
multi-organism localization	3.27e-08	6	65
ATP metabolic process	5.94e-08	8	248
regulation of carbohydrate metabolic process	9.28e-08	7	154
protein export from nucleus	9.28e-08	7	154
nuclear pore	1.05e-07	5	33
tRNA-containing ribonucleoprotein complex export from nucleus	1.2e-07	5	34
nuclear envelope	1.21e-07	8	276
carbohydrate catabolic process	1.24e-07	7	163
tRNA transport	1.5e-07	5	36
protein localization to nucleus	4.15e-07	7	195
import into nucleus	5.61e-07	6	108
protein-containing complex localization	1.88e-06	7	244
protein import	4.22e-06	6	152
cellular response to heat	9.92e-06	5	83
regulation of posttranscriptional gene silencing	1.51e-05	5	91
regulation of gene silencing by RNA	1.51e-05	5	91
response to heat	2.77e-05	5	103
regulation of gene silencing	3.6e-05	5	109
gene silencing by miRNA	5.48e-05	5	119
post-transcriptional gene silencing by RNA	8.04e-05	5	129
gene silencing by RNA	8.36e-05	5	131
posttranscriptional gene silencing	8.36e-05	5	131
viral life cycle	9.77e-05	6	267
response to temperature stimulus	0.000133539	5	145
viral gene expression	0.00058224	5	196
nucleus organization	0.000630967	4	85
gene silencing	0.00075275	5	208
SMN-Sm protein complex	0.0161758	2	10
